# Supplementary material for: Food groups and risk of type 2 diabetes mellitus: a systematic review and meta-analysis of prospective studies
Source: PubMed Central journal article supplement (PMC5506108; doi:10.1007/s10654-017-0246-y), 2017-04-10
Supplement: 10654_2017_246_MOESM1_ESM.pdf [file 10654_2017_246_MOESM1_ESM.pdf]

Supplementary Appendix S1

#1 food\*[tiab] OR whole grain\*[tiab] OR refined grain\*[tiab] OR cereal\*[tiab] OR pasta\*[tiab] OR rice\*[tiab] OR potato\*[tiab] OR vegetable\*[tiab] OR fruit\*[tiab] OR nut\*[tiab] OR legume\*[tiab] OR bean\*[tiab] OR egg\*[tiab] OR dairy[tiab] OR dairies[tiab] OR milk[tiab] OR yogurt[tiab] OR cheese[tiab] OR fish[tiab] OR seafood[tiab] OR meat[tiab] OR processed meat[tiab] OR sugar sweetened beverage\*[tiab]

#2 diabetes

#3 prospective OR follow-up OR cohort OR longitudinal

#4 (#1 AND #2 AND #3)

| Food group                  | Amount       |
|-----------------------------|--------------|
| Refined grains/whole grains | 30 grams     |
| Vegetables/fruits           | 80 grams     |
| Nuts                        | 28 grams     |
| Legumes                     | 100 grams    |
| Eggs                        | 55 grams     |
| Dairy                       | 200 grams    |
| Fish                        | 100 grams    |
| Red meat                    | 85 grams     |
| Processed meat              | 30 grams     |
| SSB                         | 250 ml/grams |

Supplementary Table S1: Conversion of 1 serving in grams

| Author     | Year | Country   | Cohort name                              | Age at entry | Sex  | Sample size | Total cases | Dietary assessment                 | Outcome assessment                 | Type of whole grains                       | Adjustment factors                                                                                                                                                                 | Follow up years | Results (high vs. low intake category), Risk ratio (RR) |
|------------|------|-----------|------------------------------------------|--------------|------|-------------|-------------|------------------------------------|------------------------------------|--------------------------------------------|------------------------------------------------------------------------------------------------------------------------------------------------------------------------------------|-----------------|---------------------------------------------------------|
| Ericson    | 2013 | Sweden    | MDC                                      | 45-74        | Both | 27140       | 1709        | 7 day menu book & SFFQ & interview | Registries                         | fiber rich soft or crisp bread and cereals | Age, season, energy intake, Body Mass Index, physical activity, smoking, Alcohol, Education                                                                                        | 12              | ♀: 0.85 (0.68, 1.06)<br>♂: 0.84 (0.68, 1.04)            |
| Hodge      | 2004 | Australia | The Melbourne Collaborative Cohort Study | 40-69        | Both | 31641       | 365         | FFQ                                | self-reported/ doctor confirmation | whole meal bread                           | Sex, Age, Body Mass Index, waist: hip ratio, energy intake, education, alcohol, physical activity, weight change in the last 5 years, country of birth, family history of diabetes | 4               | 0.86 (0.63, 1.18)                                       |
| Kochar     | 2007 | USA       | PHS I                                    | 40-86        | Men  | 21152       | 1958        | abbreviated food questionnaire     | self reported                      | whole grain cereals                        | Age, Body Mass Index, physical activity, smoking, Alcohol, vegetables, vitamin intake                                                                                              | 19.1            | 0.60 (0.5, 0.71)                                        |
| Lacoppidan | 2015 | Denmark   | DCH                                      | 50-64        | Both | 55060       | 7366        | SFFQ                               | registry                           | rye bread & oatmeal                        | Age, Study area, Body Mass Index, energy intake, smoking, alcohol,                                                                                                                 | 15.3            | ♀: Rye bread: 0.96 (0.88, 1.04)<br>Oatmeal:             |

|          |      |         |                                                 |       |       |       |      |                           |                                                  |              |                                                                                                                                                                      |     |                                                                                       |
|----------|------|---------|-------------------------------------------------|-------|-------|-------|------|---------------------------|--------------------------------------------------|--------------|----------------------------------------------------------------------------------------------------------------------------------------------------------------------|-----|---------------------------------------------------------------------------------------|
|          |      |         |                                                 |       |       |       |      |                           |                                                  |              | coffee, fiber, calcium, magnesium, vegetable, fruit, meat, rice, family history of diabetes, Hypertension, physical activity                                         |     | 0.90 (0.81, 0.99)<br>♂:<br>Rye bread: 0.89 (0.84, 0.96)<br>Oatmeal: 0.88 (0.81, 0.96) |
| Meyer    | 2000 | USA     | IWHS                                            | 55-69 | Women | 35988 | 1141 | FFQ                       | self reported                                    | whole grains | Age, energy intake, waist: hip ratio, Body Mass Index, physical activity, smoking, alcohol, education, dietary factors                                               | 6   | 0.93 (0.75, 1.15)                                                                     |
| Montonen | 2003 | Finland | Finnish Mobile Clinic Health Examination Survey | 40-69 | Both  | 4316  | 156  | Dietary history interview | registration to the Social Insurance Institution | whole grains | Age, Sex, area, energy intake, Body Mass Index, smoking, vegetables, fruit and berries                                                                               | 10  | 0.65 (0.36, 1.17)                                                                     |
| Parker   | 2013 | USA     | WHI                                             | 50-79 | Women | 72215 | 3465 | SFFQ                      | self reported                                    | whole grains | Age, Race, energy intake, Body Mass Index, smoking, alcohol, hormone use, education income, family history of diabetes, physical activity, dairy, vegetables, fruit, | 7.9 | 0.78 (0.64, 0.95)                                                                     |

|             |      |         |                            |       |       |       |      |      |                                                                         |                   |                                                                                                                                                                                            |    |                   |
|-------------|------|---------|----------------------------|-------|-------|-------|------|------|-------------------------------------------------------------------------|-------------------|--------------------------------------------------------------------------------------------------------------------------------------------------------------------------------------------|----|-------------------|
|             |      |         |                            |       |       |       |      |      |                                                                         |                   | vitamin D, folic acid, Potassium, magnesium, fiber                                                                                                                                         |    |                   |
| van Dam     | 2006 | USA     | Black Women's Health Study | 21-69 | Women | 41186 | 1964 | SFFQ | self reported                                                           | whole grains      | Age, energy intake, Body Mass Index, Alcohol, physical activity, family history of diabetes, Smoking, Education, Coffee, Sugar-sweetened soft drink, red meat, processed meat, whole grain | 8  | 0.69 (0.60, 0.79) |
| von Ruesten | 2013 | Germany | EPIC-Potsdam study         | 35-65 | Both  | 23531 | 837  | SFFQ | self-reported/inquiry to the physician                                  | whole grain bread | Age, Sex, energy intake, Body Mass Index, waist: hip ratio, smoking, alcohol, physical activity, Hypertension, high blood lipid levels, education, vitamin supplementation                 | 8  | 0.92 (0.85, 1.00) |
| Sun         | 2010 | USA     | HPFS                       | 32-87 | Men   | 39765 | 2648 | SFFQ | self-reported/extra questionnaire/National Diabetes Data group criteria | whole grains      | Age, ethnicity, Body Mass Index, physical activity, energy intake, smoking, alcohol, family history of diabetes,                                                                           | 20 | 0.72 (0.63, 0.82) |

|          |      |        |        |       |       |       |      |      |                                                                         |              |                                                                                                                                                                            |      |                   |
|----------|------|--------|--------|-------|-------|-------|------|------|-------------------------------------------------------------------------|--------------|----------------------------------------------------------------------------------------------------------------------------------------------------------------------------|------|-------------------|
|          |      |        |        |       |       |       |      |      |                                                                         |              | multivitamin intake, red meat, fruits, vegetables, coffee                                                                                                                  |      |                   |
| Sun      | 2010 | USA    | NHS I  | 37-65 | Women | 69120 | 5500 | SFFQ | self-reported/extra questionnaire/National Diabetes Data group criteria | whole grains | Age, ethnicity, Body Mass Index, physical activity, energy intake, smoking, alcohol, family history of diabetes, multivitamin intake, red meat, fruits, vegetables, coffee | 22   | 0.70 (0.64, 0.77) |
| Sun      | 2010 | USA    | NHS II | 26-45 | Women | 88343 | 2359 | SFFQ | self-reported/extra questionnaire/National Diabetes Data group criteria | whole grains | Age, ethnicity, Body Mass Index, physical activity, energy intake, smoking, alcohol, family history of diabetes, multivitamin intake, red meat, fruits, vegetables, coffee | 14   | 0.73 (0.68, 0.78) |
| Wirström | 2013 | Sweden | NA     | 35-56 | Both  | 5206  | 165  | SFFQ | OGTT/WHO criteria                                                       | whole grains | Age, Sex, education, blood pressure, physical activity, smoking, family history of diabetes                                                                                | 8-10 | 0.59 (0.41, 0.85) |

Supplementary Table S2: General study characteristics of the included studies investigating the association between whole grain intake and risk of T2D;

| Author  | Year | Country | Cohort name | Age at entry | Sex  | Sample size | Total cases | Dietary assessment                 | Outcome assessment                                                                        | Type of refined grains | Adjustment factors                                                                                                                                                    | Follow up years | Results (high vs. low intake category) Risk ratio (RR) |
|---------|------|---------|-------------|--------------|------|-------------|-------------|------------------------------------|-------------------------------------------------------------------------------------------|------------------------|-----------------------------------------------------------------------------------------------------------------------------------------------------------------------|-----------------|--------------------------------------------------------|
| Ericson | 2013 | Sweden  | MDC         | 45-74        | Both | 27140       | 1709        | 7 day menu book & SFFQ & interview | Registries                                                                                | refined cereals        | Age, season, energy intake, Body Mass Index, physical activity, smoking, Alcohol, Education                                                                           | 12              | ♀: 1.07 (0.87, 1.32)<br>♂: 1.02 (0.82, 1.27)           |
| Fung    | 2002 | USA     | HPFS        | 40-75        | Men  | 42898       | 1197        | SFFQ                               | self-reported/extra questionnaire/National Diabetes Data group criteria                   | refined grains         | Age, period, missing food frequency questionnaire, energy intake, Body Mass Index, physical activity, smoking, Alcohol, family history of diabetes, fruit, vegetables | ≤12             | 1.08 (0.87, 1.34)                                      |
| Golozar | 2017 | Iran    | GCS         | 40-87        | Both | 50045       | 902         | FFQ                                | Participants who had FPG ≥126 mg/dl, HbA1c >6.5% or were receiving treatment for diabetes | white rice             | Age, sex, wealth score, education, marital status, opium, alcohol, physical activity, smoking, energy                                                                 | 5               | 0.90 (0.73, 1.12)                                      |



|        |      |           |                                          |       |       |       |      |      |                                                                                                                                            |                          |                                                                                                                                                                                    |    |                                                                |
|--------|------|-----------|------------------------------------------|-------|-------|-------|------|------|--------------------------------------------------------------------------------------------------------------------------------------------|--------------------------|------------------------------------------------------------------------------------------------------------------------------------------------------------------------------------|----|----------------------------------------------------------------|
|        |      |           |                                          |       |       |       |      |      |                                                                                                                                            |                          | intake, meat, employment status,                                                                                                                                                   |    |                                                                |
| Golzar | 2017 | Iran      | TLGS                                     | 39    | Both  | 2887  | 81   | FFQ  | Participants who had FPG $\geq$ 126 mg/dl, or 2h plasma glucose $\geq$ 200 mg/dl during OGTT receiving treatment anti-diabetic medications | white rice               | Age, sex, family history of diabetes, education, marital status, physical activity, smoking, energy intake, meat, employment status                                                | 3  | 2.28 (1.19, 4.37)                                              |
| Hodge  | 2004 | Australia | The Melbourne Collaborative Cohort Study | 40-69 | Both  | 31641 | 365  | FFQ  | self-reported/ doctor confirmation                                                                                                         | white bread, white pasta | Sex, Age, body Mass Index, waist: hip ratio, energy intake, education, alcohol, physical activity, weight change in the last 5 years, country of birth, family history of diabetes | 4  | white bread: 1.13 (0.86, 1.5)<br>white pasta: 0.86 (0.6, 1.23) |
| Liu    | 2000 | USA       | NHS                                      | 38-63 | Women | 75521 | 1879 | SFFQ | self-reported/extra questionnaire/National Diabetes Data group criteria                                                                    | refined grains           | Age, Body Mass Index, physical activity, energy intake, smoking, alcohol, family history of diabetes, vitamin E or multivitamin intake                                             | 10 | 1.11 (0.94, 1.31)                                              |
| Meyer  | 2000 | USA       | IWHS                                     | 55-69 | Women | 35988 | 1141 | FFQ  | self reported                                                                                                                              | refined grains           | Age, energy intake, waist: hip ratio, Body Mass                                                                                                                                    | 6  | 0.87 (0.70, 1.08)                                              |

|          |      |         |                                                 |       |      |       |      |                           |                                                  |                |                                                                                                                                                                                                                 |    |                                                                                                                                                                                                 |
|----------|------|---------|-------------------------------------------------|-------|------|-------|------|---------------------------|--------------------------------------------------|----------------|-----------------------------------------------------------------------------------------------------------------------------------------------------------------------------------------------------------------|----|-------------------------------------------------------------------------------------------------------------------------------------------------------------------------------------------------|
|          |      |         |                                                 |       |      |       |      |                           |                                                  |                | Index, physical activity, smoking, alcohol, education                                                                                                                                                           |    |                                                                                                                                                                                                 |
| Montonen | 2003 | Finland | Finnish Mobile Clinic Health Examination Survey | 40-69 | Both | 4316  | 156  | Dietary history interview | registration to the Social Insurance Institution | refined grains | Age, Sex, Area, energy intake, Body Mass Index, smoking, vegetables, fruit and berries                                                                                                                          | 10 | 0.62<br>(0.36, 1.07)                                                                                                                                                                            |
| Nanri    | 2010 | Japan   | JPHC                                            | 45-75 | Both | 59288 | 1103 | SFFQ                      | self reported                                    | rice cooked    | Age, Area, energy intake, Body Mass Index, smoking, alcohol, family history of diabetes, physical activity, hypertension, occupation, vegetables, fruit, coffee, calcium, magnesium, fish, fiber, bread, noodle | 5  | ♂:<br>Rice cooked: 1.19<br>(0.85, 1.68)<br>Bread: 0.85<br>(0.64, 1.14)<br>Noodle: 0.89<br>(0.68, 1.17)<br><br>♀:<br>Rice cooked: 1.65<br>(1.06, 2.57)<br>Bread: 0.99<br>(0.73, 1.34)<br>Noodle: |

|          |      |       |                   |       |       |       |      |      |                                                                         |                       |                                                                                                                                                                                                                         |     |                         |
|----------|------|-------|-------------------|-------|-------|-------|------|------|-------------------------------------------------------------------------|-----------------------|-------------------------------------------------------------------------------------------------------------------------------------------------------------------------------------------------------------------------|-----|-------------------------|
|          |      |       |                   |       |       |       |      |      |                                                                         |                       |                                                                                                                                                                                                                         |     | 1.15<br>(0.83,<br>1.58) |
| Parker   | 2013 | USA   | WHI               | 50-79 | Women | 72215 | 3465 | SFFQ | self reported                                                           | refined grains        | Age, Race, energy intake, Body Mass Index, smoking, alcohol, hormone use, education income, family history of diabetes, physical activity, dairy, vegetables, fruit, vitamin D, folic acid, potassium, magnesium, fiber | 7.9 | 0.77<br>(0.61,<br>0.97) |
| Soriguer | 2013 | Spain | The Pizzara study |       | Both  | 605   | 54   | FFQ  | Fasting blood sample and OGTT/WHO criteria                              | White rice            | Age, Sex, abnormal glucose regulation at baseline, obesity, carbohydrate consumption                                                                                                                                    | 6   | 0.41<br>(0.17,<br>0.99) |
| Sun      | 2010 | USA   | HPFS              | 32-87 | Men   | 39765 | 2648 | SFFQ | self-reported/extra questionnaire/National Diabetes Data group criteria | white rice (uncooked) | Age, ethnicity, Body Mass Index, physical activity, energy intake, smoking, alcohol, family history of diabetes, multivitamin intake, red meat, fruits, vegetables, whole grains,                                       | 20  | 1.02<br>(0.77,<br>1.35) |

|     |      |     |        |       |       |       |      |      |                                                                         |                       |                                                                                                                                                                                                                                                  |    |                      |
|-----|------|-----|--------|-------|-------|-------|------|------|-------------------------------------------------------------------------|-----------------------|--------------------------------------------------------------------------------------------------------------------------------------------------------------------------------------------------------------------------------------------------|----|----------------------|
|     |      |     |        |       |       |       |      |      |                                                                         |                       | coffee                                                                                                                                                                                                                                           |    |                      |
| Sun | 2010 | USA | NHS I  | 37-65 | Women | 69120 | 5500 | SFFQ | self-reported/extra questionnaire/National Diabetes Data group criteria | white rice (uncooked) | Age, ethnicity, Body Mass Index, physical activity, energy intake, smoking, alcohol, family history of diabetes, multivitamin intake, red meat, fruits, vegetables, whole grains, coffee, postmenopausal status, hormone use, oral contraceptive | 22 | 1.11<br>(0.87, 1.42) |
| Sun | 2010 | USA | NHS II | 26-45 | Women | 88343 | 2359 | SFFQ | self-reported/extra questionnaire/National Diabetes Data group criteria | white rice (uncooked) | Age, ethnicity, Body Mass Index, physical activity, energy intake, smoking, alcohol, family history of diabetes, multivitamin intake, red meat, fruits, vegetables, whole grains, coffee, postmenopausal status, hormone use, oral contraceptive | 14 | 1.40<br>(1.09, 1.80) |

Supplementary Table S3: General study characteristics of the included studies investigating the association between refined grain intake and risk of T2D.

| Author  | Year | Country   | Cohort name                              | Age at entry | Sex   | Sample size | Total cases | Dietary assessment              | Outcome assessment                                                      | Type of vegetables | Adjustment factors                                                                                                                                                                                                   | Follow up years           | Results (high vs. low intake category) Risk ratio (RR) |
|---------|------|-----------|------------------------------------------|--------------|-------|-------------|-------------|---------------------------------|-------------------------------------------------------------------------|--------------------|----------------------------------------------------------------------------------------------------------------------------------------------------------------------------------------------------------------------|---------------------------|--------------------------------------------------------|
| Bazzano | 2008 | USA       | NHS                                      | 38-63        | Women | 71346       | 4529        | SFFQ                            | self-reported/extra questionnaire/National Diabetes Data group criteria | vegetables         | Age, energy intake, Body Mass Index, family history of diabetes, postmenopausal hormone use, smoking, alcohol, physical activity, whole grains, nuts, processed meats, coffee, potatoes, sugar sweetened soft drinks | 18                        | 1.05 (0.94, 1.17)                                      |
| Cooper  | 2013 | Europe    | EPIC-InterAct                            | 52.3         | Both  | 16154       | 10821       | Country specific questionnaires | self reported or registers or mortality data                            | vegetables         | Age, Sex, country, center, education, energy intake, Body Mass Index, smoking, alcohol, physical activity, vegetables                                                                                                | 3.99 million person-years | 0.94 (0.84, 1.05)                                      |
| Hodge   | 2004 | Australia | The Melbourne Collaborative Cohort Study | 40-69        | Both  | 31641       | 365         | FFQ                             | self-reported/doctor confirmation                                       | vegetables         | Sex, Age, Body Mass Index, waist: hip ratio, energy intake, education, alcohol, physical activity, weight change in the last 5                                                                                       | 4                         | 0.88 (0.60, 1.29)                                      |

|            |      |         |      |       |       |       |      |      |                            |                         |                                                                                                                                                                                                 |      |                                                                                                                                                              |
|------------|------|---------|------|-------|-------|-------|------|------|----------------------------|-------------------------|-------------------------------------------------------------------------------------------------------------------------------------------------------------------------------------------------|------|--------------------------------------------------------------------------------------------------------------------------------------------------------------|
|            |      |         |      |       |       |       |      |      |                            |                         | years, country of birth, family history of diabetes                                                                                                                                             |      |                                                                                                                                                              |
| Kurotani   | 2013 | Japan   | JPHC | 45-75 | Both  | 48437 | 896  | SFFQ | self reported              | vegetables              | Age, energy intake, Body Mass Index, smoking, alcohol, physical activity, area, hypertension, family history of diabetes, coffee, magnesium, calcium                                            | 5    | ♂<br>0.81 (0.59, 1.11)<br>♀<br>0.99 (0.66, 1.49)                                                                                                             |
| Lacoppidan | 2015 | Denmark | DCH  | 50-64 | Both  | 55060 | 7366 | SFFQ | registry                   | root vegetable, cabbage | Age, Study area, Body Mass Index, energy intake, smoking, alcohol, coffee, fiber, calcium, magnesium, vegetable, fruit, meat, rice, family history of diabetes, Hypertension, physical activity | 15.3 | ♀:<br>Cabbage:<br>0.99 (0.92, 1.06)<br>Root vegetables:<br>0.94 (0.87, 1.02)<br>♂:<br>Cabbage:<br>0.92 (0.86, 0.99)<br>Root vegetables:<br>0.98 (0.91, 1.05) |
| Liu        | 2004 | USA     | WHS  | ≥45   | Women | 38018 | 1614 | SFFQ | self-reported/ADA criteria | vegetables              | Age, energy intake, Body Mass Index, smoking, alcohol, physical activity, hypertension, hypercholesterolemia, family history of diabetes                                                        | 8.8  | 1.03 (0.86, 1.23)                                                                                                                                            |

|          |      |         |                                                 |       |       |        |       |                           |                                                                             |            |                                                                                                                                                      |      |                   |
|----------|------|---------|-------------------------------------------------|-------|-------|--------|-------|---------------------------|-----------------------------------------------------------------------------|------------|------------------------------------------------------------------------------------------------------------------------------------------------------|------|-------------------|
| Mamluk   | 2016 | USA     | NIH-AARP                                        | >50   | Both  | 401909 | 22782 | FFQ                       | self-administered questionnaires or in interviews                           | vegetables | age, sex, Body mass Index, physical activity, energy intake, alcohol consumption, education, smoking                                                 | 10.6 | 0.92 (0.87, 0.97) |
| Mamluk   | 2016 | Europe  | EPIC Greece                                     | >50   | Both  | 20629  | 1077  | 24 h recall               | self-administered questionnaires or in interviews                           | vegetables | age, sex, Body Mass Index, physical activity, energy intake, alcohol consumption, education, smoking                                                 | 10   | 2.15 (0.93, 4.97) |
| Meyer    | 2000 | USA     | IWHS                                            | 55-69 | Women | 35988  | 1141  | FFQ                       | self reported                                                               | vegetables | Age, energy intake, Body Mass Index, waist: hip ratio, education, smoking, alcohol, physical activity                                                | 6    | 1.07 (0.86, 1.33) |
| Montonen | 2005 | Finland | Finnish Mobile Clinic Health Examination Survey | 40-69 | Both  | 4304   | 383   | Dietary history interview | registration to the Social Insurance Institution                            | vegetables | Age, Sex, energy intake, Body Mass Index, smoking, family history of diabetes, Geographic area                                                       | 23   | 0.77 (0.57, 1.04) |
| Mursu    | 2014 | Finland | KIHD                                            | 42-60 | Men   | 2332   | 432   | 4 day food recording      | self reported and diabetes register and blood glucose measurements and OGTT | vegetables | Age, examination years, waist: hip ratio, education, energy intake, Body Mass Index, family history of diabetes, smoking, alcohol, physical activity | 19.3 | 0.81 (0.61, 1.08) |
| Qiao     | 2014 | USA     | WHI                                             | 50-79 | Women | 154493 | 10285 | FFQ                       | self reported                                                               | vegetables | Age, energy intake, Body Mass Index,                                                                                                                 | 7.6  | 1.10 (0.96, 1.26) |



|          |      |       |      |       |       |       |      |     |                            |            |                                                                                                                                                                     |     |                   |
|----------|------|-------|------|-------|-------|-------|------|-----|----------------------------|------------|---------------------------------------------------------------------------------------------------------------------------------------------------------------------|-----|-------------------|
|          |      |       |      |       |       |       |      |     |                            |            | Waist: hip ratio, education, smoking, physical activity, family history of diabetes, study arms, hormone therapy use                                                |     |                   |
| Villegas | 2008 | China | SWHS | 40-70 | Women | 64191 | 1608 | FFQ | self-reported/ADA criteria | vegetables | Age, energy intake, Body Mass Index, waist: hip ratio, education, smoking, alcohol, physical activity, vegetable and fiber intake, income, occupation, hypertension | 4.6 | 0.72 (0.61, 0.85) |

Supplementary Table S4: General study characteristics of the included studies investigating the association between vegetable intake and risk of T2D.

| Author   | Year | Country   | Cohort name                              | Age at entry | Sex  | Sample size | Total cases | Dietary assessment              | Outcome assessment                           | Type of fruits | Adjustment factors                                                                                                                                                                 | Follow up years           | Results (high vs. low intake category) Risk ratio (RR) |
|----------|------|-----------|------------------------------------------|--------------|------|-------------|-------------|---------------------------------|----------------------------------------------|----------------|------------------------------------------------------------------------------------------------------------------------------------------------------------------------------------|---------------------------|--------------------------------------------------------|
| Cooper   | 2013 | Europe    | EPIC-InterAct                            | 52.3         | Both | 16154       | 10821       | Country specific questionnaires | self reported or registers or mortality data | fruit          | Age, Sex, country, center, education, energy intake, Body Mass Index, smoking, alcohol, physical activity, vegetables                                                              | 3.99 million person-years | 0.89 (0.76, 1.04)                                      |
| Hodge    | 2004 | Australia | The Melbourne Collaborative Cohort Study | 40-69        | Both | 31641       | 365         | FFQ                             | self-reported/ doctor confirmation           | fruit          | Sex, Age, Body Mass Index, waist: hip ratio, energy intake, education, alcohol, physical activity, weight change in the last 5 years, country of birth, family history of diabetes | 4                         | 0.85 (0.59, 1.22)                                      |
| Kurotani | 2013 | Japan     | JPHC                                     | 45-75        | Both | 48437       | 896         | SFFQ                            | self reported                                | fruit          | Age, energy intake, Body Mass Index, smoking, alcohol, physical activity, area, hypertension, family history of diabetes, coffee, magnesium, calcium                               | 5                         | ♂:<br>0.94 (0.71, 1.24)<br>♀:<br>1.04 (0.73, 1.48)     |

|            |      |         |             |       |       |        |       |             |                                                   |                  |                                                                                                                                                                                                 |      |                                              |
|------------|------|---------|-------------|-------|-------|--------|-------|-------------|---------------------------------------------------|------------------|-------------------------------------------------------------------------------------------------------------------------------------------------------------------------------------------------|------|----------------------------------------------|
| Lacoppidan | 2015 | Denmark | DCH         | 50-64 | Both  | 55060  | 7366  | SFFQ        | registry                                          | apples and bears | Age, Study area, Body Mass Index, energy intake, smoking, alcohol, coffee, fiber, calcium, magnesium, vegetable, fruit, meat, rice, family history of diabetes, Hypertension, physical activity | 15.3 | ♀: 1.03 (0.96, 1.11)<br>♂: 0.97 (0.91, 1.04) |
| Liu        | 2004 | USA     | WHS         | ≥45   | Women | 38018  | 1614  | SFFQ        | self-reported/ADA criteria                        | fruit            | Age, energy intake, Body Mass Index, smoking, alcohol, physical activity, hypertension, hypercholesterolemia, family history of diabetes                                                        | 8.8  | 0.97 (0.82, 1.15)                            |
| Mamluk     | 2016 | USA     | NIH-AARP    | >50   | Both  | 401909 | 22782 | FFQ         | self-administered questionnaires or in interviews | fruit            | age, sex, Body Mass Index, physical activity, energy intake, alcohol consumption, education, smoking                                                                                            | 10.6 | 0.95 (0.91, 0.99)                            |
| Mamluk     | 2016 | Europe  | EPIC Greece | >50   | Both  | 20629  | 1077  | 26 h recall | self-administered questionnaires or in interviews | fruit            | age, sex, Body Mass Index, physical activity, energy intake, alcohol consumption, education, smoking                                                                                            | 10   | 1.09 (0.77, 1.54)                            |

|          |      |         |                                                 |       |       |       |      |                           |                                                                                          |                 |                                                                                                                                                                                                                                     |                      |                      |
|----------|------|---------|-------------------------------------------------|-------|-------|-------|------|---------------------------|------------------------------------------------------------------------------------------|-----------------|-------------------------------------------------------------------------------------------------------------------------------------------------------------------------------------------------------------------------------------|----------------------|----------------------|
| Meyer    | 2000 | USA     | IWHS                                            | 55-69 | Women | 35988 | 1141 | FFQ                       | self reported                                                                            | fruit           | Age, energy intake, Body Mass Index, waist: hip ratio, education, smoking, alcohol, physical activity                                                                                                                               | 6                    | 1.14<br>(0.93, 1.40) |
| Montonen | 2005 | Finland | Finnish Mobile Clinic Health Examination Survey | 40-69 | Both  | 4304  | 383  | Dietary history interview | registration to the Social Insurance Institution                                         | fruit & berries | Age, Sex, energy intake, Body Mass Index, smoking, family history of diabetes, Geographic area                                                                                                                                      | 23                   | 0.69<br>(0.51, 0.93) |
| Muraki   | 2013 | USA     | NHS                                             | 48.2  | Women | 66105 | 6358 | SFFQ                      | self reported/extra questionnaire/National Diabetes Data group criteria or death reports | whole fruit     | Age, ethnicity, energy intake, Body Mass Index, smoking, multivitamin use, fruit juice, physical activity, area, family history of diabetes, modified alternate healthy index score, menopausal status, post-menopausal hormone use | 1394127 person years | 0.99<br>(0.82, 1.20) |
| Muraki   | 2013 | USA     | NHS II                                          | 35.9  | Women | 85104 | 3153 | SFFQ                      | self-reported/extra questionnaire/National Diabetes Data group criteria or death reports | whole fruit     | Age, ethnicity, energy intake, Body Mass Index, smoking, multivitamin use, fruit juice, physical activity, area, family history of diabetes, modified alternate healthy index score,                                                | 1416111 person years | 0.82<br>(0.72, 0.93) |

|          |      |         |      |       |       |        |       |                      |                                                                                          |             |                                                                                                                                                                                     |                     |                   |
|----------|------|---------|------|-------|-------|--------|-------|----------------------|------------------------------------------------------------------------------------------|-------------|-------------------------------------------------------------------------------------------------------------------------------------------------------------------------------------|---------------------|-------------------|
|          |      |         |      |       |       |        |       |                      |                                                                                          |             | menopausal status, post-menopausal hormone use, oral contraceptive                                                                                                                  |                     |                   |
| Muraki   | 2013 | USA     | HPFS | 49.9  | Men   | 36173  | 2687  | SFFQ                 | self-reported/extra questionnaire/National Diabetes Data group criteria or death reports | whole fruit | Age, ethnicity, energy intake, Body Mass Index, smoking, multivitamin use, fruit juice, physical activity, area, family history of diabetes, modified alternate healthy index score | 654403 person yaers | 0.92 (0.78, 1.09) |
| Mursu    | 2014 | Finland | KIHD | 42-60 | Men   | 2332   | 432   | 4 day food recording | self reported and diabetes register and blood glucose measurements and OGTT              | whole fruit | Age, examination years, waist: hip ratio, education, energy intake, Body Mass Index, family history of diabetes, smoking, alcohol, physical activity                                | 19.3                | 0.98 (0.75, 1.28) |
| Qiao     | 2014 | USA     | WHI  | 50-79 | Women | 154493 | 10285 | FFQ                  | self reported                                                                            | fruit       | Age, energy intake, Body Mass Index, waist: hip ratio, education, smoking, physical activity, family history of diabetes, study arms, hormone therapy use                           | 7.6                 | 0.99 (0.93, 1.05) |
| Villegas | 2008 | China   | SWHS | 40-70 | Women | 64191  | 1608  | FFQ                  | self-reported/ADA criteria                                                               | fruit       | Age, energy intake, Body Mass Index,                                                                                                                                                | 4.6                 | 1.05 (0.90,       |

|  |  |  |  |  |  |  |  |  |  |  |                                                                                                                                                  |  |       |
|--|--|--|--|--|--|--|--|--|--|--|--------------------------------------------------------------------------------------------------------------------------------------------------|--|-------|
|  |  |  |  |  |  |  |  |  |  |  | waist: hip ratio,<br>education, smoking,<br>alcohol, physical<br>activity, vegetable<br>and fiber intake,<br>income, occupation,<br>hypertension |  | 1.22) |
|--|--|--|--|--|--|--|--|--|--|--|--------------------------------------------------------------------------------------------------------------------------------------------------|--|-------|

Supplementary Table S5: General study characteristics of the included studies investigating the association between fruit intake and risk of T2D.

| Author  | Year | Country | Cohort name   | Age at entry | Sex   | Sample size | Total cases | Dietary assessment | Outcome assessment                                                                                                              | Type of nuts | Adjustment factors                                                                                                                                                         | Follow up years                 | Results (high vs. low intake category) Risk ratio (RR) |
|---------|------|---------|---------------|--------------|-------|-------------|-------------|--------------------|---------------------------------------------------------------------------------------------------------------------------------|--------------|----------------------------------------------------------------------------------------------------------------------------------------------------------------------------|---------------------------------|--------------------------------------------------------|
| Asghari | 2017 | Iran    | TLGS          | ≥20          | Both  | 1984        | 150         | FFQ                | Participants who had FPG ≥126 mg/dl, or 2h plasma glucose ≥ 200 mg/dl during OGTT receiving treatment anti-diabetic medications | nuts         | Sex, education, smoking, BMI, blood pressure, cholesterol, triacylglycerols, vegetables, fruits, red meat, fish, poultry, total sugar, fiber, fats, carbohydrates, protein | 6.2                             | 0.47 (0.25, 0.90)                                      |
| Buijsse | 2015 | Europe  | EPIC-InterAct | 52.3         | Both  | 16835       | 12403       | 24h recall         | self reported or registers or mortality data                                                                                    | nuts & seeds | Centre, Sex, education, energy intake, Body Mass Index, smoking, alcohol, physical activity                                                                                | 3.99 million years of follow-up | 0.88 (0.75, 1.03)                                      |
| Kochar  | 2010 | USA     | PHS I         | 40.7-87.1    | Men   | 20224       | 1828        | SFFQ               | self reported                                                                                                                   | nuts         | Age, randomization arm, Body Mass Index, smoking, alcohol, physical activity, breakfast cereal, dairy, red meat, hypertension                                              | 19.2                            | 0.87 (0.61, 1.24)                                      |
| Pan     | 2013 | USA     | NHS           | 52-77        | Women | 59259       | 5121        | SFFQ               | self-reported/extra questionnaire/National                                                                                      | nuts         | Age, energy intake, Body                                                                                                                                                   | 10                              | 1.00 (0.87, 1.15)                                      |

|     |      |     |        |       |       |       |      |      |                                                                         |      |                                                                                                                                                                                                                                                       |    |                   |
|-----|------|-----|--------|-------|-------|-------|------|------|-------------------------------------------------------------------------|------|-------------------------------------------------------------------------------------------------------------------------------------------------------------------------------------------------------------------------------------------------------|----|-------------------|
|     |      |     |        |       |       |       |      |      | Diabetes Data group criteria                                            |      | Mass Index, race, family history of diabetes, smoking, alcohol, physical activity, postmenopausal status, menopausal hormone use, whole grains, multivitamin use, whole grains, vegetables, fruits, fish, red meat, coffee, sugar sweetened beverages |    |                   |
| Pan | 2013 | USA | NHS II | 35-52 | Women | 91799 | 4098 | SFFQ | self-reported/extra questionnaire/National Diabetes Data group criteria | nuts | Age, energy intake, Body Mass Index, race, family history of diabetes, smoking, alcohol, physical activity, postmenopausal status, menopausal hormone use, whole grains, multivitamin use, whole grains, vegetables, fruits, fish, red meat,          | 10 | 1.02 (0.85, 1.22) |



|             |      |         |           |       |       |       |      |      |                                        |         |                                                                                                                                                                                                                                               |     |                   |
|-------------|------|---------|-----------|-------|-------|-------|------|------|----------------------------------------|---------|-----------------------------------------------------------------------------------------------------------------------------------------------------------------------------------------------------------------------------------------------|-----|-------------------|
|             |      |         |           |       |       |       |      |      |                                        |         | coffee, sugar sweetened beverages                                                                                                                                                                                                             |     |                   |
| Parker      | 2003 | USA     | IWHS      | 11    | Women | 35988 | 1831 | FFQ  | self-reported/ criteria                | nuts    | Age, Body Mass Index, waist: hip ratio, physical activity Smoking, Alcohol, Dairy, Education, Estrogen use, fiber, polyunsaturated fat, saturated fat, monounsaturated fat, trans, fruit, vegetables, whole grains, fish, sea food, magnesium | 11  | 1.51 (1.13, 2.02) |
| Villegas    | 2008 | China   | SWHS      | 40-70 | Women | 64227 | 1605 | FFQ  | self-reported/ criteria                | peanuts | Age, energy intake, Body Mass Index, waist: hip ratio, education, smoking, alcohol, physical activity, vegetable and fiber intake, income, occupation, hypertension                                                                           | 4.6 | 0.80 (0.68, 0.94) |
| von Ruesten | 2013 | Germany | The EPIC- | 35-65 | Both  | 23531 | 837  | SFFQ | self-reported/inquiry to the physician | nuts    | Age, Sex, energy intake, Body                                                                                                                                                                                                                 | 8   | 0.95 (0.87, 1.06) |

|  |  |  |               |  |  |  |  |  |  |  |                                                                                                                                              |  |  |
|--|--|--|---------------|--|--|--|--|--|--|--|----------------------------------------------------------------------------------------------------------------------------------------------|--|--|
|  |  |  | Potsdam study |  |  |  |  |  |  |  | Mass Index, waist: hip ratio, smoking, alcohol, physical activity, Hypertension, high blood lipid levels, education, vitamin supplementation |  |  |
|--|--|--|---------------|--|--|--|--|--|--|--|----------------------------------------------------------------------------------------------------------------------------------------------|--|--|

Supplementary Table S6: General study characteristics of the included studies investigating the association between nut intake and risk of T2D.

| Author  | Year | Country | Cohort name | Age at entry | Sex   | Sample size | Total cases | Dietary assessment | Outcome assessment                                                                                                                                                                                                                                        | Type of legumes | Adjustment factors                                                                                                                                                                                                                                                                          | Follow up years      | Results (high vs. low intake category) Risk ratio (RR) |
|---------|------|---------|-------------|--------------|-------|-------------|-------------|--------------------|-----------------------------------------------------------------------------------------------------------------------------------------------------------------------------------------------------------------------------------------------------------|-----------------|---------------------------------------------------------------------------------------------------------------------------------------------------------------------------------------------------------------------------------------------------------------------------------------------|----------------------|--------------------------------------------------------|
| Bazzano | 2008 | USA     | NHS         | 38-63        | Women | 71346       | 4529        | SFFQ               | self-reported/extra questionnaire/National Diabetes Data group criteria                                                                                                                                                                                   | legumes         | Age, energy intake, Body Mass Index, family history of diabetes, postmenopausal hormone use, smoking, alcohol, physical activity, whole grains, nuts, processed meats, coffee, potatoes, sugar sweetened soft drinks                                                                        | 18                   | 1.14 (1.03, 1.26)                                      |
| Ding    | 2016 | USA     | NHS         | 30-54        | Women | 63115       | 4519        | FFQ                | Self-reported incident T2D was mailed a validated supplementary questionnaire regarding symptoms, diagnostic tests and hypoglycemic therapy to confirm the diagnosis of diabetes. Cases were ascertained using the American Diabetes Association criteria | Soy             | race, family history of diabetes, baseline disease status: hypertension, hypercholesterolemia; Body Mass Index, physical activity, overall dietary pattern (alternate Healthy eating Index), total energy intake, coffee consumption, smoking status, menopausal status, and postmenopausal | 1966321 person years | 0.88 (0.66, 1.17)                                      |

|       |      |     |        |       |       |       |      |     |                                                                                                                                                                                                                                                           |              |                                                                                                                                                                                                                                                                                                         |                      |                   |
|-------|------|-----|--------|-------|-------|-------|------|-----|-----------------------------------------------------------------------------------------------------------------------------------------------------------------------------------------------------------------------------------------------------------|--------------|---------------------------------------------------------------------------------------------------------------------------------------------------------------------------------------------------------------------------------------------------------------------------------------------------------|----------------------|-------------------|
|       |      |     |        |       |       |       |      |     |                                                                                                                                                                                                                                                           |              | hormone use                                                                                                                                                                                                                                                                                             |                      |                   |
| Ding  | 2016 | USA | NHS II | 30-54 | Women | 79061 | 3920 | FFQ | Self-reported incident T2D was mailed a validated supplementary questionnaire regarding symptoms, diagnostic tests and hypoglycemic therapy to confirm the diagnosis of diabetes. Cases were ascertained using the American Diabetes Association criteria | Soy          | race, family history of diabetes, baseline disease status: hypertension, hypercholesterolemia, body mass index, physical activity, overall dietary pattern (alternate Healthy eating Index), total energy intake, coffee consumption, smoking status, menopausal status, and postmenopausal hormone use | 1966321 person years | 0.97 (0.84, 1.12) |
| Ding  | 2016 | USA | HPFS   | 30-54 | Men   | 21281 | 742  | FFQ | Self-reported incident T2D was mailed a validated supplementary questionnaire regarding symptoms, diagnostic tests and hypoglycemic therapy to confirm the diagnosis of diabetes. Cases were ascertained using the American Diabetes Association criteria | Soy          | race, family history of diabetes, baseline disease status: hypertension, hypercholesterolemia, Body Mass Index, physical activity, overall dietary pattern (alternate Healthy eating Index), total energy intake, coffee consumption, smoking status, menopausal status, and postmenopausal hormone use | 1966321 person years | 0.92 (0.80, 1.06) |
| Meyer | 2004 | USA | WHS    | 55-69 | Women | 35988 | 1141 | FFQ | self reported                                                                                                                                                                                                                                             | mature beans | Age, energy intake, Body Mass Index,                                                                                                                                                                                                                                                                    | 6                    | 0.96 (0.76,       |

|          |      |           |      |       |      |       |      |      |                            |                 |                                                                                                                                                                                                                                              |     |                                                              |
|----------|------|-----------|------|-------|------|-------|------|------|----------------------------|-----------------|----------------------------------------------------------------------------------------------------------------------------------------------------------------------------------------------------------------------------------------------|-----|--------------------------------------------------------------|
|          |      |           |      |       |      |       |      |      |                            |                 | waist: hip ratio, education, smoking, alcohol, physical activity                                                                                                                                                                             |     | 1.21)                                                        |
| Morimoto | 2011 | USA       | MEC  | 45-75 | Both | 75344 | 8564 | FFQ  | Registries & Self reported | soy             | Body Mass Index, Ethnicity physical activity, education, total energy, smoking status, alcohol, dietary fiber and processed red meat intake                                                                                                  | 14  | ♂:<br>1.18<br>(1.09, 1.28)<br><br>♀:<br>1.18<br>(1.09, 1.28) |
| Mueller  | 2012 | Australia | SCHS | 45-74 | Both | 43176 | 2252 | SFFQ | Self reported              | unsweetened soy | Body Mass Index, age, sex, dialect, year of interview, educational level, smoking status, alcohol, physical activity, baseline hypertensive status, rice, noodles, other grains, red meat, green vegetable, soybean drink, and energy intake | 5.7 | 0.72<br>(0.59, 0.88)                                         |
| Nanri    | 2010 | Japan     | JPHS | 45-75 | Both | 59791 | 1114 | SFFQ | self reported              | soy products    | age, study area, Body Mass Index, smoking, alcohol, family history of diabetes mellitus, leisure time physical activity, history of hypertension, coffee consumption, green tea consumption, magnesium intake,                               | 5   | ♂:<br>1.02<br>(0.75, 1.39)<br><br>♀:<br>0.98<br>(0.70, 1.37) |

|             |      |         |                        |       |       |       |      |      |                                        |         |                                                                                                                                                                            |     |                      |
|-------------|------|---------|------------------------|-------|-------|-------|------|------|----------------------------------------|---------|----------------------------------------------------------------------------------------------------------------------------------------------------------------------------|-----|----------------------|
|             |      |         |                        |       |       |       |      |      |                                        |         | calcium intake, vegetable intake, fiber intake, fish intake, and energy intake                                                                                             |     |                      |
| Villegas    | 2008 | China   | SWHS                   | 40-70 | Women | 64227 | 1605 | FFQ  | self reported                          | legumes | Age, energy intake, Body Mass Index, waist: hip ratio, education, smoking, alcohol, physical activity, vegetable and fiber intake, income, occupation, hypertension        | 4.6 | 0.62<br>(0.51, 0.75) |
| von Ruesten | 2013 | Germany | The EPIC-Potsdam study | 35-65 | Both  | 23531 | 837  | SFFQ | self-reported/inquiry to the physician | legumes | Age, Sex, energy intake, Body Mass Index, waist: hip ratio, smoking, alcohol, physical activity, Hypertension, high blood lipid levels, education, vitamin supplementation | 8   | 1.01<br>(0.96, 1.06) |

Supplementary Table S7: General study characteristics of the included studies investigating the association between legume intake and risk of T2D.

| Author  | Year | Country | Cohort name | Age at entry | Sex   | Sample size | Total cases | Dietary assessment                | Outcome assessment                                           | Type of eggs | Adjustment factors                                                                                                                                                                                            | Follow up years | Results (high vs. low intake category) Risk ratio (RR) |
|---------|------|---------|-------------|--------------|-------|-------------|-------------|-----------------------------------|--------------------------------------------------------------|--------------|---------------------------------------------------------------------------------------------------------------------------------------------------------------------------------------------------------------|-----------------|--------------------------------------------------------|
| Djousse | 2009 | USA     | PHS I       | ≥40          | Men   | 20703       | 1921        | SFFQ                              | Self reported                                                | eggs         | Age, energy intake, Body Mass Index, smoking, alcohol, physical activity, Hypertension, Hypercholesterolemia, family history of diabetes, red meat, fruits, vegetables, saturated fat, trans, polyunsaturated | 20              | 1.58 (1.25, 2.00)                                      |
| Djousse | 2009 | USA     | WHS         | ≥45          | Women | 36295       | 2112        | SFFQ                              | Self reported                                                | eggs         | Age, energy intake, Body Mass Index, smoking, alcohol, physical activity, Hypertension, Hypercholesterolemia, family history of diabetes, red meat, fruits, vegetables, saturated fat, trans, polyunsaturated | 11.7            | 1.77 (1.28, 2.45)                                      |
| Djousse | 2010 | USA     | CHS         | ≥65          | Both  | 3898        | 313         | picture sorted food questionnaire | annual medication assessment and fasting glucose measurement | eggs         | Age, race, Body Mass Index, smoking, alcohol, physical                                                                                                                                                        | 11.3            | ♂<br>1.81 (0.77,                                       |

|          |      |        |                     |       |      |       |      |                                    |                                     |      |                                                                                                                                                                                                                                                  |     |                                                            |
|----------|------|--------|---------------------|-------|------|-------|------|------------------------------------|-------------------------------------|------|--------------------------------------------------------------------------------------------------------------------------------------------------------------------------------------------------------------------------------------------------|-----|------------------------------------------------------------|
|          |      |        |                     |       |      |       |      |                                    |                                     |      | activity, cereal-fiber, field center                                                                                                                                                                                                             |     | 4.25)<br>♀<br>0.38<br>(0.10, 1.44)                         |
| Djousse  | 2015 | USA    | Jackson Heart Study | 55±13 | Both | 4568  | 1004 | FFQ                                | NA                                  | eggs | age, sex, smoking, alcohol, Body Mass Index, physical activity score, education, energy intake, red meat, fiber, dietary magnesium, fruit/vegetables, trans fat, waist circumference, history of hypertension, history of cardiovascular disease | 7.3 | 1.17<br>(0.81, 1.69)                                       |
| Ericson  | 2015 | Sweden | MDC                 | 45-74 | Both | 26930 | 2860 | 7 day menu book & SFFQ & interview | Registries or follow up examination | eggs | Age, Sex, season, method version, energy intake, Body Mass Index, education, smoking, alcohol, physical activity                                                                                                                                 | 14  | 1.14<br>(1.02, 1.27)                                       |
| Kurotani | 2014 | Japan  | JPHC                | 45-75 | Both | 63466 | 1165 | SFFQ                               | self reported                       | eggs | Age, center area, energy intake, smoking, alcohol, Hypertension, family history of diabetes, physical activity, Body Mass Index, Magnesium, Calcium, Coffee, rice, fish, shellfish, meat,                                                        | 5   | ♂<br>1.06<br>(0.85, 1.32)<br><br>♀<br>0.82<br>(0.63, 1.07) |



|          |      |         |                                                 |       |       |       |      |                           |                                                                   |      |                                                                                                                                                                                                                                                                                         |      |                      |
|----------|------|---------|-------------------------------------------------|-------|-------|-------|------|---------------------------|-------------------------------------------------------------------|------|-----------------------------------------------------------------------------------------------------------------------------------------------------------------------------------------------------------------------------------------------------------------------------------------|------|----------------------|
|          |      |         |                                                 |       |       |       |      |                           |                                                                   |      | vegetables, soft drinks                                                                                                                                                                                                                                                                 |      |                      |
| Lajous   | 2015 | France  | E3N                                             | 43-68 | Women | 65364 | 1803 | FFQ                       | selfreported/supplementary questionnaire or drug information      | eggs | Age, energy intake, education, Body Mass Index, smoking, alcohol, physical activity, hormone replacement therapy, Hypertension, Hypercholesterolemia, family history of diabetes, processed red meat, fruits, vegetables, coffee, sugar sweetened drinks, artificially sweetened drinks | 14   | 1.00<br>(0.78, 1.28) |
| Montonen | 2005 | Finland | Finnish Mobile Clinic Health Examination Survey | 40-69 | Both  | 4304  | 383  | Dietary history interview | registration to the Social Insurance Institution                  | eggs | Age, Sex, energy intake, Body Mass Index, smoking, family history of diabetes, geographic area                                                                                                                                                                                          | 23   | 0.91<br>(0.67, 1.24) |
| Vang     | 2008 | USA     | AMS & AHS                                       | 45-88 | Both  | 8401  | 535  | FFQ                       | self-reported                                                     | eggs | Age, Sex                                                                                                                                                                                                                                                                                | 17   | 1.15<br>(0.85, 1.56) |
| Virtanen | 2015 | Finland | KIHD                                            | 42-60 | Men   | 2332  | 432  | 4-d food records          | selfreported or hospital and insurance registration/ WHO criteria | eggs | Age, energy intake, examination year, education, Body Mass Index, smoking, alcohol, physical activity, hypertension family history of diabetes, serum long chain omega-3 polyunsaturated fatty                                                                                          | 19.3 | 0.55<br>(0.38, 0.80) |

|             |      |         |                        |       |      |       |      |      |                                           |      |                                                                                                                                                                                                                         |     |                      |
|-------------|------|---------|------------------------|-------|------|-------|------|------|-------------------------------------------|------|-------------------------------------------------------------------------------------------------------------------------------------------------------------------------------------------------------------------------|-----|----------------------|
|             |      |         |                        |       |      |       |      |      |                                           |      | acids, fiber, linoleic acid, berries, fruits, vegetables, cholesterol intake                                                                                                                                            |     |                      |
| von Ruesten | 2013 | Germany | The EPIC-Potsdam study | 35-65 | Both | 23531 | 837  | SFFQ | selfreported/inquiry to the physician     | eggs | Age, Sex, energy intake, Body Mass Index, waist: hip ratio, smoking, alcohol, physical activity, Hypertension, high blood lipid levels, education, vitamin supplementation                                              | 8   | 0.97<br>(0.75, 1.25) |
| Wallin      | 2016 | Sweden  | COSM                   | 45-79 | Men  | 39610 | 4173 | FFQ  | registry                                  | eggs | Age, Body Mass Index, energy intake, education, smoking, alcohol, physical activity, cardiovascular disease, coffee, red meat, processed meat, fish, fruit, vegetables, white bread, caviar, sweet buns/biscuits, fiber | 15  | 1.11<br>(0.95, 1.30) |
| Zazpe       | 2013 | Spain   | SUN project            | 20-90 | Both | 15956 | 91   | SFFQ | selfreported/medical records confirmation | eggs | Age, Sex, energy intake, Mediterranean food pattern, Alcohol, Body Mass Index, Smoking, physical activity, family history of diabetes, history of hypertension , history of                                             | 6.6 | 0.70<br>(0.30, 1.21) |

|  |  |  |  |  |  |  |  |  |  |  |                      |  |  |
|--|--|--|--|--|--|--|--|--|--|--|----------------------|--|--|
|  |  |  |  |  |  |  |  |  |  |  | hypercholesterolemia |  |  |
|--|--|--|--|--|--|--|--|--|--|--|----------------------|--|--|

Supplementary Table S8: General study characteristics of the included studies investigating the association between egg intake and risk of T2D.

| Author          | Year | Country     | Cohort name     | Age at entry | Sex  | Sample size | Total cases | Dietary assessment | Outcome assessment                                                                                                                                                    | Type of dairy | Adjustment factors                                                                                                                                                                                                                                                       | Follow up years | Results (high vs. low intake category) Risk ratio (RR) |
|-----------------|------|-------------|-----------------|--------------|------|-------------|-------------|--------------------|-----------------------------------------------------------------------------------------------------------------------------------------------------------------------|---------------|--------------------------------------------------------------------------------------------------------------------------------------------------------------------------------------------------------------------------------------------------------------------------|-----------------|--------------------------------------------------------|
| Brouwer-Brolsma | 2016 | Netherlands | Rotterdam study | >55          | Both | 7983        | 393         | SFFQ               | ascertained using records of general practitioners, hospital discharge letters, and serum glucose measurements from Rotterdam study visits taking place every 4 years | Total dairy   | age, sex, alcohol, smoking, education, physical activity, Body Mass Index, total energy intake, energy adjusted meat intake, energy adjusted fish intake, and potential intermediates: total cholesterol, HDL-cholesterol, C-reactive protein, hypertension              | 9.5             | 0.93 (0.69, 1.25)                                      |
| Chen            | 2014 | USA         | HPFS            | 40-75        | Men  | 41436       | 3364        | SFFQ               | self-reported/extra questionnaire/National Diabetes Data group criteria or death reports                                                                              | Total dairy   | Age, energy intake, Body Mass Index, Alcohol, physical activity, family history of diabetes, Smoking, race, history of Hypertension and/or Hypercholesterolemia, oral contraceptive use, trans fat, glycemic load, red & processed meat, nuts sugar sweetened beverages, | 24              | 0.99 (0.77, 1.11)                                      |

|            |      |       |          |       |       |       |      |      |                                                                                          |             |                                                                                                                                                                                                                                                                                                                            |     |                   |
|------------|------|-------|----------|-------|-------|-------|------|------|------------------------------------------------------------------------------------------|-------------|----------------------------------------------------------------------------------------------------------------------------------------------------------------------------------------------------------------------------------------------------------------------------------------------------------------------------|-----|-------------------|
|            |      |       |          |       |       |       |      |      |                                                                                          |             | coffee                                                                                                                                                                                                                                                                                                                     |     |                   |
| Chen       | 2014 | USA   | NHS I    | 30-55 | Women | 67138 | 7841 | SFFQ | self-reported/extra questionnaire/National Diabetes Data group criteria or death reports | Total dairy | Age, energy intake, Body Mass Index, Alcohol, physical activity, family history of diabetes, Smoking, race, history of hypertension and/or hypercholesterolemia, Menopausal status, menopausal hormone use, oral contraceptive use, trans fat, glycemic load, red & processed meat, nuts sugar sweetened beverages, coffee | 30  | 1.05 (0.97, 1.14) |
| Chen       | 2014 | USA   | NHS II   | 25-42 | Women | 85884 | 3951 | SFFQ | self-reported/extra questionnaire/National Diabetes Data group criteria or death reports | Total dairy | Age, energy intake, Body Mass Index, Alcohol, physical activity, family history of diabetes, Smoking, race, history of hypertension and/or hypercholesterolemia, Menopausal status, menopausal hormone use, oral contraceptive use, trans fat, glycemic load, red & processed meat, nuts sugar sweetened beverages, coffee | 16  | 1.00 (0.89, 1.12) |
| Diaz-Lopez | 2015 | Spain | PREDIMED | 55-80 | Both  | 3454  | 270  | SFFQ | Medical records review or routine                                                        | Total dairy | Age, Sex, Body Mass Index, intervention,                                                                                                                                                                                                                                                                                   | 4.1 | 0.68 (0.47,       |

|          |      |           |                              |       |      |       |      |                                    |                                                                              |             |                                                                                                                                                                                                    |    |                        |
|----------|------|-----------|------------------------------|-------|------|-------|------|------------------------------------|------------------------------------------------------------------------------|-------------|----------------------------------------------------------------------------------------------------------------------------------------------------------------------------------------------------|----|------------------------|
|          |      |           |                              |       |      |       |      |                                    | glucose test                                                                 |             | education, physical activity, hypertension or antihypertensive use, fasting glucose, HDL-C, triacylglycerol's, smoking, alcohol, vegetables, legumes, fruits, cereals, meat, fish, olive oil, nuts |    | 0.98)                  |
| Elwood   | 2007 | UK        | Caerphilly prospective study | 45-59 | Men  | 640   | 41   | 7-day weighed record               | self reported                                                                | milk        | Age, Body Mass Index, Smoking, social class                                                                                                                                                        | 20 | 0.57 (0.20, 1.62)      |
| Ericson  | 2015 | Sweden    | MDC                          | 45-74 | Both | 26930 | 2860 | 7 day menu book & SFFQ & interview | Registries or follow up examination                                          | Total dairy | Age, Sex, season, method version, energy intake, Body Mass Index, education, smoking, alcohol, physical activity                                                                                   | 14 | 0.90 (0.80, 1.01)      |
| Grantham | 2012 | Australia | AusDiab                      | 25-88 | Both | 5582  | 209  | SFFQ                               | treatment reporting or fasting plasma glucose or 2h post-load plasma glucose | Total dairy | Age, Sex, energy intake, education, family history of diabetes, smoking, triacylglycerol's, physical activity, systolic blood pressure, waist circumference, HDL-C                                 | 5  | 0.71 (0.48, 1.05)      |
| Kirrii   | 2009 | Japan     | JPHC                         | 40-69 | Both | 59796 | 1114 | SFFQ                               | self reported                                                                | Total dairy | Age, energy intake, Body Mass Index, smoking, alcohol, family history of diabetes,                                                                                                                 | 5  | ♂<br>1.18 (0.90, 1.55) |

|          |      |           |         |       |       |       |      |         |                                                                                                  |             |                                                                                                                                                                                                                     |     |                           |
|----------|------|-----------|---------|-------|-------|-------|------|---------|--------------------------------------------------------------------------------------------------|-------------|---------------------------------------------------------------------------------------------------------------------------------------------------------------------------------------------------------------------|-----|---------------------------|
|          |      |           |         |       |       |       |      |         |                                                                                                  |             | Hypertension, physical activity, area, coffee, magnesium                                                                                                                                                            |     | ♀<br>0.71<br>(0.51, 0.99) |
| Liu      | 2006 | USA       | WHS     | NA    | Women | 37183 | 1603 | SFFQ    | self-reported/ phone call or extra questionnaire/ADA diagnostic criteria or contacting physician | Total dairy | Age, energy intake, Body Mass Index, Alcohol, physical activity, family history of diabetes, Hypercholesterolemia, Hypertension, Hormones, Smoking, fiber, magnesium, glycemic load, total fat, calcium, vitamin D  | 10  | 0.68<br>(0.52, 0.89)      |
| Louie    | 2013 | Australia | BMES    | ≥49   | Both  | 1824  | 145  | SFFQ    | self reported                                                                                    | Total dairy | Age, Sex, Body Mass Index, systolic blood pressure, HDL-C, total-cholesterol, triacylglycerol's, calcium                                                                                                            | 10  | 1.50<br>(0.47, 4.79)      |
| Margolis | 2011 | USA       | WHI-OS  | 50-79 | Women | 82076 | 3946 | SFFQ    | self reported                                                                                    | Total dairy | Age, energy intake, Body Mass Index, race, education, income, family history of diabetes, postmenopausal hormone therapy, smoking, alcohol, physical activity, blood pressure, glycemic load, fat, fiber, magnesium | 7,9 | 0.93<br>(0.83, 1.04)      |
| Montonen | 2005 | Finland   | Finnish | 40-   | Both  | 4304  | 383  | Dietary | registration to the                                                                              | Total       | Age, Sex, energy                                                                                                                                                                                                    | 23  | 0.90                      |

|                |      |        |                                         |     |      |       |       |                                            |                                                                                                                                 |             |                                                                                                                                                                                                                             |                           |                   |
|----------------|------|--------|-----------------------------------------|-----|------|-------|-------|--------------------------------------------|---------------------------------------------------------------------------------------------------------------------------------|-------------|-----------------------------------------------------------------------------------------------------------------------------------------------------------------------------------------------------------------------------|---------------------------|-------------------|
|                |      |        | Mobile Clinic Health Examination Survey | 69  |      |       |       | history interview                          | Social Insurance Institution                                                                                                    | dairy       | intake, Body Mass Index, smoking, family history of diabetes, Geographic area                                                                                                                                               |                           | (0.74, 1.09)      |
| Moslehi        | 2015 | Iran   | TLGS                                    | ≥20 | Both | 520   | 178   | FFQ                                        | Participants who had FPG ≥126 mg/dl, or 2h plasma glucose ≥ 200 mg/dl during OGTT receiving treatment anti-diabetic medications | Total dairy | Age, sex, family history of diabetes, BMI, waist circumference, energy intake, blood pressure, triacylglycerols, cholesterol                                                                                                | NA                        | 0.73 (0.47, 1.16) |
| Sluijs         | 2012 | Europe | EPIC-Interact Study                     | 52  | Both | 16835 | 12405 | SFFQ or quantitative dietary questionnaire | self reported or care registers or medication use, mortality data                                                               | Total dairy | Age, Sex, Body Mass Index, energy intake, education, smoking, alcohol, physical activity, fruit, vegetables, red meat, processed meat, sugar sweetened soft drinks, coffee, cereals, calcium, magnesium, vitamin D          | 3.99 million person years | 0.97 (0.82, 1.15) |
| Soedamah-Muthu | 2012 | UK     | Whitehall II                            | NA  | Both | 4186  | 273   | FFQ                                        | self reported or glucose tolerance test                                                                                         | Total dairy | Sex, Age, energy intake, Body Mass Index, ethnicity, employment grade, smoking, alcohol, family history of coronary heart disease and/or hypertension, physical activity, coffee, fruit, vegetables, bread, meat, fish, tea | 10                        | 1.30 (0.95, 1.78) |



|          |      |         |                                          |       |       |       |      |      |                                   |             |                                                                                                                                                                                                                                           |     |                      |
|----------|------|---------|------------------------------------------|-------|-------|-------|------|------|-----------------------------------|-------------|-------------------------------------------------------------------------------------------------------------------------------------------------------------------------------------------------------------------------------------------|-----|----------------------|
| Struijk  | 2013 | Denmark | Inter99                                  | 30-60 | Both  | 5232  | 214  | FFQ  | health examination/WHO definition | Total dairy | Age, Sex, Intervention group, family history of diabetes, waist: hip ratio, energy intake, education, smoking, alcohol, physical activity, wholegrain cereal, meat, fish, fruit, vegetables, tea, coffee, change in diet during follow-up | 5   | 0.95<br>(0.86, 1.05) |
| van Dam  | 2006 | USA     | Black Women's Health Study               | 21-69 | Women | 41186 | 1964 | SFFQ | selfreported                      | Total dairy | Age, energy intake, Body Mass Index, Alcohol, physical activity, family history of diabetes, Smoking, Education, Coffee, Sugar-sweetened soft drink, red meat, processed meat, whole grain                                                | 8   | 0.93<br>(0.75, 1.15) |
| Vang     | 2008 | USA     | AMS & AHS                                | 45-88 | Both  | 8401  | 543  | FFQ  | selfreported                      | milk        | Age, Sex                                                                                                                                                                                                                                  | 17  | 0.91<br>(0.75, 1.10) |
| Villegas | 2009 | China   | SWHS                                     | 40-70 | Women | 64191 | 2270 | FFQ  | selfreported/ADA criteria         | fresh milk  | Age, energy intake, Body Mass Index, WHR, smoking, alcohol, education, income, occupation, Hypertension, physical activity                                                                                                                | 6,9 | 0.72<br>(0.65, 0.80) |
| Zong     | 2014 | China   | Nutrition and Health of Aging Population | 50-70 | Both  | 2091  | 507  | SFFQ | health examination                | Total dairy | Age, Sex, region, residence, family history of diabetes, Body Mass Index,                                                                                                                                                                 | 6   | 0.81<br>(0.63, 1.04) |

|  |  |  |                |  |  |  |  |  |  |  |                                                                             |  |  |
|--|--|--|----------------|--|--|--|--|--|--|--|-----------------------------------------------------------------------------|--|--|
|  |  |  | in China study |  |  |  |  |  |  |  | smoking, fiber, changes in Body Mass Index, waist circumference and glucose |  |  |
|--|--|--|----------------|--|--|--|--|--|--|--|-----------------------------------------------------------------------------|--|--|

Supplementary Table S9: General study characteristics of the included studies investigating the association between dairy intake and risk of T2D.

| Author  | Year | Country | Cohort name | Age at entry | Sex   | Sample size | Total cases | Dietary assessment                 | Outcome assessment                  | Type of fish              | Adjustment factors                                                                                                                                                                                                                          | Follow up years | Results (high vs. low intake category) Risk ratio (RR)    |
|---------|------|---------|-------------|--------------|-------|-------------|-------------|------------------------------------|-------------------------------------|---------------------------|---------------------------------------------------------------------------------------------------------------------------------------------------------------------------------------------------------------------------------------------|-----------------|-----------------------------------------------------------|
| Djousse | 2011 | USA     | WHS         | ≥45          | Women | 36328       | 2370        | SFFQ                               | selfreported                        | fish                      | Age, Body Mass Index, energy intake, smoking, alcohol, menopausal status, coffee, cereal fiber, red meat, a-linolenic and linoleic acid, magnesium, trans fat, saturated fat, family history of diabetes, physical activity, glycemic index | 12.4            | 1.49 (1.30, 1.71)                                         |
| Ericson | 2015 | Sweden  | MDC         | 45-74        | Both  | 26930       | 2860        | 7 day menu book & SFFQ & interview | Registries or follow up examination | fish& shellfish, high fat | Age, Study area, Body Mass Index, energy intake, smoking, alcohol, coffee, fiber, calcium, magnesium, vegetable, fruit, meat, rice, family history of diabetes, Hypertension,                                                               | 14              | High-fat: 1.05 (0.94, 1.18)<br>Low-fat: 0.97 (0.86, 1.09) |

|         |      |     |        |       |       |       |      |      |                                                                         |      |                                                                                                                                                                                                                                                   |       |                   |
|---------|------|-----|--------|-------|-------|-------|------|------|-------------------------------------------------------------------------|------|---------------------------------------------------------------------------------------------------------------------------------------------------------------------------------------------------------------------------------------------------|-------|-------------------|
|         |      |     |        |       |       |       |      |      |                                                                         |      | physical activity                                                                                                                                                                                                                                 |       |                   |
| Kaushik | 2009 | USA | NHS II | 26-46 | Women | 91669 | 2728 | SFFQ | self-reported/extra questionnaire/National Diabetes Data group criteria | fish | Age, energy intake, Body Mass Index, smoking, alcohol, family history of diabetes, physical activity, saturated, trans fat, linolenic acid, linoleic acid, caffeine, cereal fiber, glycemic index, hormone replacement therapy, contraceptive use | 14-18 | 1.16 (0.96, 1.40) |
| Kaushik | 2009 | USA | NHS    | 30-55 | Women | 61031 | 4159 | SFFQ | self-reported/extra questionnaire/National Diabetes Data group criteria | fish | Age, energy intake, Body Mass Index, smoking, alcohol, family history of diabetes, physical activity, saturated, trans fat, linolenic acid, linoleic acid, caffeine, cereal fiber, glycemic index, menopausal status, postmenopausal hormone use  | 14-18 | 1.29 (1.05, 1.58) |
| Kaushik | 2009 | USA | HPFS   | 39-78 | Men   | 42504 | 2493 | SFFQ | self-reported/extra questionnaire/National Diabetes Data                | fish | Age, energy intake, Body Mass Index, smoking,                                                                                                                                                                                                     | 14-18 | 1.32 (0.99, 1.76) |

|            |      |         |      |       |       |       |      |      |                |            |                                                                                                                                                                                                                           |      |                                              |
|------------|------|---------|------|-------|-------|-------|------|------|----------------|------------|---------------------------------------------------------------------------------------------------------------------------------------------------------------------------------------------------------------------------|------|----------------------------------------------|
|            |      |         |      |       |       |       |      |      | group criteria |            | alcohol, family history of diabetes, physical activity, saturated, trans fat, linolenic acid, linoleic acid, caffeine, cereal fiber, glycemic index                                                                       |      |                                              |
| Krishnan   | 2010 | USA     | BWHS | 30-69 | Women | 44072 | 2737 | SFFQ | self reported  | fried fish | Age, time period, education, TV watching, energy intake, Body Mass Index, smoking, alcohol, coffee, cereal fiber, sugar sweetened cola, calcium, vitamin D, family history of diabetes, physical activity, glycemic index | 10   | 0.89 (0.64, 1.24)                            |
| Lacoppidan | 2015 | Denmark | DCH  | 50-64 | Women | 55060 | 7366 | SFFQ | registry       | fish       | Age, Study area, Body Mass Index, energy intake, smoking, alcohol, coffee, fiber, calcium, magnesium, vegetable, fruit, meat, rice, family history of diabetes,                                                           | 15.3 | ♀: 0.98 (0.91, 1.06)<br>♂: 1.02 (0.95, 1.08) |

|          |      |         |                                                 |       |       |       |       |                                    |                                                                   |                               |                                                                                                                                                                                     |    |                                                  |
|----------|------|---------|-------------------------------------------------|-------|-------|-------|-------|------------------------------------|-------------------------------------------------------------------|-------------------------------|-------------------------------------------------------------------------------------------------------------------------------------------------------------------------------------|----|--------------------------------------------------|
|          |      |         |                                                 |       |       |       |       |                                    |                                                                   |                               | Hypertension, physical activity                                                                                                                                                     |    |                                                  |
| Montonen | 2005 | Finland | Finnish Mobile Clinic Health Examination Survey | 40-69 | Both  | 4304  | 383   | Dietary history interview          | registration to the Social Insurance Institution                  | Unprocessed; salted or smoked | Age, Sex, energy intake, Body Mass Index, smoking, family history of diabetes, Geographic area                                                                                      | 23 | 0.92 (0.77, 1.10)                                |
| Nanri    | 2011 | Japan   | JPHC                                            | 45-75 | Men   | 52680 | 971   | SFFQ                               | self reported                                                     | fish& seafood                 | Age, Study area, Body Mass Index, energy intake, smoking, alcohol, coffee, fiber, Ca, Mg, vegetable, fruit, meat, rice, family history of diabetes, Hypertension, physical activity | 5  | ♂:<br>0.73 (0.54, 0.99)<br><br>♀:<br>1.01 (0.69) |
| Patel    | 2012 | Europe  | EPIC-InterAct Study                             | 50,7  | Both  | 24813 | 10740 | Quantitative questionnaire or SFFQ | self reported or care registers or medication use, mortality data | fish& shellfish               | Age, Study area, Body Mass Index, energy intake, smoking, alcohol, coffee, fiber, Ca, Mg, vegetable, fruit, meat, rice, family history of diabetes, Hypertension, physical activity | NA | 0.99 (0.86, 1.14)                                |
| Rylander | 2014 | Norway  | NOWAC                                           | 30-70 | Women | 33740 | 479   | FFQ                                | Self reported                                                     | Fish                          | Age, BMI, smoking, physical activity, hypertension                                                                                                                                  | NA | 0.66 (0.36, 1.21)                                |

|                |      |             |                           |       |       |       |      |      |                    |                 |                                                                                                                                                                         |     |                   |
|----------------|------|-------------|---------------------------|-------|-------|-------|------|------|--------------------|-----------------|-------------------------------------------------------------------------------------------------------------------------------------------------------------------------|-----|-------------------|
| Vang           | 2008 | USA         | AMS & AHS                 | 45-88 | Both  | 8401  | 543  | FFQ  | self reported      | fish            | Age, Sex                                                                                                                                                                | 17  | 1.12 (0.88, 1.43) |
| van Woudenberg | 2009 | Netherlands | Rotterdam study           | ≥55   | Both  | 4472  | 463  | SFFQ | Health authorities | fish            | Age, Sex, education, energy intake, smoking, alcohol, saturated, trans fat, fiber                                                                                       | 15  | 1.32 (1.02, 1.71) |
| Villegas       | 2011 | China       | SWHS                      | 40-70 | Women | 64193 | 2262 | FFQ  | self reported      | fish& shellfish | Age, Body Mass Index, WHR, energy intake, smoking, alcohol, income, education, occupation, family history of diabetes, hypertension, physical activity, dietary pattern | 8.9 | 0.86 (0.76, 0.79) |
| Villegas       | 2011 | China       | SMHS                      | 40-74 | Men   | 51936 | 833  | FFQ  | self reported      | fish& shellfish | Age, Body Mass Index, WHR, energy intake, smoking, alcohol, income, education, occupation, family history of diabetes, hypertension, physical activity, dietary pattern | 4.1 | 0.92 (0.73, 1.16) |
| Wallin         | 2015 | Sweden      | The Cohort of Swedish Men | 45-79 | Men   | 35583 | 3624 | FFQ  | registry           | total fish      | Age, Study area, Body Mass Index, energy intake, smoking, alcohol,                                                                                                      | 15  | 0.79 (0.60, 1.04) |

|  |  |  |  |  |  |  |  |  |  |  |                                                                                                                                    |  |  |
|--|--|--|--|--|--|--|--|--|--|--|------------------------------------------------------------------------------------------------------------------------------------|--|--|
|  |  |  |  |  |  |  |  |  |  |  | coffee, fiber, Ca,<br>Mg, vegetable,<br>fruit, meat, rice,<br>family history of<br>diabetes,<br>Hypertension,<br>physical activity |  |  |
|--|--|--|--|--|--|--|--|--|--|--|------------------------------------------------------------------------------------------------------------------------------------|--|--|

Supplementary Table S10: General study characteristics of the included studies investigating the association between fish intake and risk of T2D.



| Author        | Year | Country | Cohort name   | Age at entry | Sex  | Sample size | Total cases | Dietary assessment                     | Outcome assessment                                          | Type of red meat                     | Adjustment factors                                                                                                                                              | Follow up years | Results (high vs. low intake category)                            |
|---------------|------|---------|---------------|--------------|------|-------------|-------------|----------------------------------------|-------------------------------------------------------------|--------------------------------------|-----------------------------------------------------------------------------------------------------------------------------------------------------------------|-----------------|-------------------------------------------------------------------|
| EPIC-Interact | 2013 | Europe  | EPIC-InterAct | 20-80        | Both | 16835       | 11559       | Country specific dietary questionnaire | Self-reported/medication/registers linkage/hospital records | red meat                             | sex, Body Mass Index, energy intake, smoking status, alcohol consumption, physical activity, educational level                                                  | 11.7            | 1.20 (1.07, 1.35)                                                 |
| Ericson       | 2015 | Sweden  | MDC           | 45-74        | Both | 26930       | 2860        | 7 day menu book & SFFQ & interview     | Registries or follow up examination                         | red meat<br>low-fat<br>non processed | Age, Sex, season, method version, energy intake, Body Mass Index, education, smoking, alcohol, physical activity                                                | 14              | Low-fat:<br>1.24 (1.1, 1.39)<br><br>High-fat:<br>1.01 (0.9, 1.14) |
| Fretts        | 2012 | USA     | SHFS          |              | Both | 2001        | 243         | SFFQ                                   | Medication or fasting plasma glucose concentration          | unprocessed red meat                 | age, sex, site, energy intake, Body Mass Index, education, smoking, alcohol, family history of diabetes, physical activity, fiber from grains and glycemic load | 5               | 0.88 (0.57, 1.36)                                                 |
| Kurotani      | 2013 | Japan   | JPHC          | 45-75        | Both | 63849       | 1160        | FFQ                                    | self reported                                               | red meat                             | Age, public health center area, Body Mass Index, smoking status, alcohol consumption, total physical activity,                                                  | 5               | ♂:<br>1.58 (1.14, 2.19)<br><br>♀:<br>0.99 (0.67, 1.46)            |

|          |      |         |      |       |       |       |      |             |                                                  |                       |                                                                                                                                                                                                                                    |    |                                                                                          |
|----------|------|---------|------|-------|-------|-------|------|-------------|--------------------------------------------------|-----------------------|------------------------------------------------------------------------------------------------------------------------------------------------------------------------------------------------------------------------------------|----|------------------------------------------------------------------------------------------|
|          |      |         |      |       |       |       |      |             |                                                  |                       | the history of hypertension, coffee consumption, the family history of diabetes, magnesium intake, calcium intake, rice intake, fish intake, vegetable intake, soft drink consumption energy intake, saturated fat                 |    |                                                                                          |
| Lee      | 2004 | USA     | IWHS | 55-69 | Women | 35698 | NA   | SFFQ        | self reported                                    | red meat non drinkers | Age, energy intake, waist-hip ratio, Body Mass Index, physical activity, Cigarette, smoking, Alcohol, Education, Marital status, Residential area, Hormone replacement therapy, Animal fat, Vegetable fat, Cereal fiber, magnesium | 11 | Non-drinker: 1.11 (0.86, 1.42)<br>1-14g/d: 1.19 (0.84, 1.67)<br>≥15g/d 4.62 (1.5, 14.21) |
| Männistö | 2010 | Finland | ATBC | 50-69 | Men   | 25943 | 1098 | picture FFQ | registration to the Social Insurance Institution | red meat              | Age, energy intake, Body Mass Index, smoking, alcohol, physical activity, blood pressure, total                                                                                                                                    | 12 | 1.22 (0.97, 1.53)                                                                        |

|              |      |         |                                                 |       |      |       |      |                                 |                                                                                                                                                             |          |                                                                                                                                                                                                                                                                                                                          |     |                   |
|--------------|------|---------|-------------------------------------------------|-------|------|-------|------|---------------------------------|-------------------------------------------------------------------------------------------------------------------------------------------------------------|----------|--------------------------------------------------------------------------------------------------------------------------------------------------------------------------------------------------------------------------------------------------------------------------------------------------------------------------|-----|-------------------|
|              |      |         |                                                 |       |      |       |      |                                 |                                                                                                                                                             |          | cholesterol, HDL-C, fruit, vegetable, rye, milk and coffee consumption                                                                                                                                                                                                                                                   |     |                   |
| Mari-Sanchis | 2016 | Spain   | SUN                                             | 20-90 | Both | 18527 | 146  | validated semi-quantitative FFQ | diagnosis of diabetes diagnosed by a doctor, patients were asked to confirm diagnosis with additional confirmation questionnaires and their medical records | Red meat | age, sex, physical activity, energy intake, Body Mass Index, family history of diabetes, , hypercholesterolemia, hypertension, dietary fiber intake, sugar sweetened beverages, smoking status, caffeine, glycemic index, adherence to Mediterranean dietary pattern, prevalent cardiovascular disease, prevalent cancer | 8.7 | 0.95 (0.62, 1.46) |
| Montonen     | 2005 | Finland | Finnish Mobile Clinic Health Examination Survey | 40-69 | Both | 4304  | 383  | Dietary history interview       | registration to the Social Insurance Institution                                                                                                            | red meat | Age, Sex, energy intake, Body Mass Index, smoking, family history of diabetes, Geographic area                                                                                                                                                                                                                           | 23  | 0.99 (0.72, 1.36) |
| Pan          | 2011 | USA     | HPFS                                            | 40-75 | Men  | 37083 | 2438 | SFFQ                            | self-reported/extra questionnaire/medic                                                                                                                     | red meat | Age, energy intake, Body Mass                                                                                                                                                                                                                                                                                            | 20  | 1.44 (1.23, 1.69) |

|     |      |     |        |       |       |       |      |      |                                                                                                           |          |                                                                                                                                                                                                                         |    |                   |
|-----|------|-----|--------|-------|-------|-------|------|------|-----------------------------------------------------------------------------------------------------------|----------|-------------------------------------------------------------------------------------------------------------------------------------------------------------------------------------------------------------------------|----|-------------------|
|     |      |     |        |       |       |       |      |      | al records /National Diabetes Data group criteria or death reports                                        |          | Index, Alcohol, physical activity, family history of diabetes, Smoking, race, history of hypertension and/or hypercholesterolemia, Menopausal status, Hormone use in women, dietary score                               |    |                   |
| Pan | 2011 | USA | NHS I  | 30-55 | Women | 79570 | 8253 | SFFQ | self-reported/extra questionnaire/medical records /National Diabetes Data group criteria or death reports | red meat | Age, energy intake, Body Mass Index, Alcohol, physical activity, family history of diabetes, Smoking, race, history of hypertension and/or hypercholesterolemia, Menopausal status, Hormone use in women, dietary score | 28 | 1.31 (1.21, 1.42) |
| Pan | 2011 | USA | NHS II | 25-42 | Women | 87504 | 3068 | SFFQ | self-reported/extra questionnaire/medical records /National Diabetes Data group criteria or death reports | red meat | Age, energy intake, Body Mass Index, Alcohol, physical activity, family history of diabetes, Smoking, race,                                                                                                             | 16 | 1.37 (1.19, 1.58) |

|                |      |             |                 |       |       |       |      |                                          |                                                                         |          |                                                                                                                                                         |      |                                                  |
|----------------|------|-------------|-----------------|-------|-------|-------|------|------------------------------------------|-------------------------------------------------------------------------|----------|---------------------------------------------------------------------------------------------------------------------------------------------------------|------|--------------------------------------------------|
|                |      |             |                 |       |       |       |      |                                          |                                                                         |          | history of hypertension and/or hypercholesterolemia, Menopausal status, Hormone use in women, dietary score                                             |      |                                                  |
| Song           | 2004 | USA         | WHS             | ≥45   | Women | 37309 | 1558 | SFFQ                                     | self-reported/blood sample/ extra questionnaire/ADA diagnostic criteria | red meat | Age, energy intake, Body Mass Index, Alcohol, physical activity, family history of diabetes, Smoking, fiber, magnesium, glycemic load, total fat        | 8.8  | 1.24 (1.00, 1.54)                                |
| Steinbrecher   | 2011 | USA         | MEC             | 45-75 | Both  | 75512 | 8587 | FFQ                                      | self reported or with medication history or with the health plans       | red meat | Age, energy intake, Body Mass Index, physical activity, Education, Ethnicity                                                                            | 14   | ♂<br>1.43 (1.29, 1.59)<br>♀<br>1.30 (1.17, 1.44) |
| van Woudenberg | 2012 | Netherlands | Rotterdam Study | ≥55   | Both  | 4366  | 456  | self administered questionnaire and SFFQ | general practitioner registries                                         | red meat | age, Body Mass Index, sex, smoking, diet prescription, and family history of diabetes, intake of energy, energy-adjusted carbohydrates, energy-adjusted | 12.4 | 1.18 (0.88, 1.58)                                |

|          |      |       |      |       |       |       |      |      |               |          |                                                                                                                                                                      |     |                   |
|----------|------|-------|------|-------|-------|-------|------|------|---------------|----------|----------------------------------------------------------------------------------------------------------------------------------------------------------------------|-----|-------------------|
|          |      |       |      |       |       |       |      |      |               |          | polyunsaturated fatty acids, energy-adjusted fiber, energy-adjusted milk, energy-adjusted cheese, soya, fish, alcohol, and tea, processed meat, poultry, CRP         |     |                   |
| Villegas | 2006 | China | SWHS | 40-70 | Women | 70609 | 1972 | SFFQ | self reported | red meat | Age, WHR, energy intake, Body Mass Index, smoking, alcohol, physical activity, vegetable intake, income, education, occupation status, hypertension, chronic disease | 4.6 | 0.94 (0.80, 1.10) |

Supplementary Table S11: General study characteristics of the included studies investigating the association between red meat intake and risk of T2D.

| Author        | Year | Country | Cohort name   | Age at entry | Sex  | Sample size | Total cases | Dietary assessment                     | Outcome assessment                                          | Type of processed meat          | Adjustment factors                                                                                                | Follow up years | Results (high vs. low intake category) Risk ratio (RR)    |
|---------------|------|---------|---------------|--------------|------|-------------|-------------|----------------------------------------|-------------------------------------------------------------|---------------------------------|-------------------------------------------------------------------------------------------------------------------|-----------------|-----------------------------------------------------------|
| EPIC-Interact | 2013 | Europe  | EPIC-InterAct | 20-80        | Both | 16835       | 11559       | Country specific dietary questionnaire | Self-reported/medication/registers linkage/hospital records | processed meat                  | sex, Body Mass Index, energy intake, smoking status, alcohol consumption, physical activity, educational level    | 11.7            | 1.16 (1.04, 1.04, 1.29)                                   |
| Ericson       | 2015 | Sweden  | MDC           | 45-74        | Both | 26930       | 2860        | 7 day menu book & SFFQ & interview     | Registries or follow up examination                         | meat products low-fat processed | Age, Sex, season, method version, energy intake, Body Mass Index, education, smoking, alcohol, physical activity  | 14              | Low fat: 1.16 (1.04, 1.30)<br>High-fat: 1.15 (1.01, 1.30) |
| Fretts        | 2012 | USA     | SHFS          | 35           | Both | 2001        | 243         | SFFQ                                   | Medication or fasting plasma glucose concentration          | processed meat                  | age, sex, site, energy intake, Body Mass Index, education, smoking, alcohol, family history of diabetes, physical | 5               | 1.35 (0.81, 2.25)                                         |

|              |      |       |      |       |      |       |      |                                           |                                                                |                       |                                                                                                                                                                                                                                                                                                                                                                                                                 |     |                                                          |
|--------------|------|-------|------|-------|------|-------|------|-------------------------------------------|----------------------------------------------------------------|-----------------------|-----------------------------------------------------------------------------------------------------------------------------------------------------------------------------------------------------------------------------------------------------------------------------------------------------------------------------------------------------------------------------------------------------------------|-----|----------------------------------------------------------|
|              |      |       |      |       |      |       |      |                                           |                                                                |                       | activity,<br>fiber from<br>grains and<br>glycemic load                                                                                                                                                                                                                                                                                                                                                          |     |                                                          |
| Kurotani     | 2013 | Japan | JPHC | 45-75 | Both | 63849 | 1160 | FFQ                                       | self reported                                                  | processed<br>red meat | Age, public<br>health center<br>area, Body<br>Mass Index,<br>smoking status,<br>alcohol<br>consumption,<br>total physical<br>activity, the<br>history of<br>hypertension,<br>coffee<br>consumption,<br>the family<br>history of<br>diabetes,<br>magnesium<br>intake, calcium<br>intake, rice<br>intake, fish<br>intake,<br>vegetable<br>intake, soft<br>drink<br>consumption<br>energy intake,<br>saturated fat | 5   | ♂:<br>1.15 (0.90,<br>1.47)<br>♀:<br>1.05 (0.79,<br>1.40) |
| Mari-Sanchis | 2016 | Spain | SUN  | 20-90 | Both | 18527 | 146  | validated<br>semi-<br>quantitative<br>FFQ | diagnosis of<br>diabetes<br>diagnosed by a<br>doctor, patients | Processed<br>meat     | age, sex,<br>physical<br>activity, energy<br>intake, Body                                                                                                                                                                                                                                                                                                                                                       | 8.7 | 1.60 (0.78,<br>3.28)                                     |



|          |      |         |                                                 |       |      |       |      |                           |                                                                                                       |                |                                                                                                                                                                                       |    |                   |
|----------|------|---------|-------------------------------------------------|-------|------|-------|------|---------------------------|-------------------------------------------------------------------------------------------------------|----------------|---------------------------------------------------------------------------------------------------------------------------------------------------------------------------------------|----|-------------------|
|          |      |         |                                                 |       |      |       |      |                           | were asked to confirm diagnosis with additional confirmation questionnaires and their medical records |                | Mass Index, family history of diabetes, , hypercholesterolemia, hypertension, dietary fiber intake, sugar sweetened beverages, smoking status, caffeine, glycemic index, adherence to |    |                   |
| Männistö | 2014 | Finland | ATBC                                            | 50-69 | Men  | 25943 | 1098 | picture FFQ               | registration to the Social Insurance Institution                                                      | Processed meat | Age, energy intake, Body Mass Index, smoking, alcohol, physical activity, BP, Serum cholesterol, Serum HDL, fruit, vegetable, rye, milk and coffee consumption                        | 12 | 1.37 (1.11, 1.71) |
| Montonen | 2005 | Finland | Finnish Mobile Clinic Health Examination Survey | 40-69 | Both | 4304  | 383  | Dietary history interview | registration to the Social Insurance Institution                                                      | processed meat | Age, Sex, energy intake, Body Mass Index, smoking, family history of diabetes, Geographic                                                                                             | 23 | 1.22 (0.89, 1.67) |

|     |      |     |       |       |       |       |      |      |                                                                                                           |                    |                                                                                                                                                                                                                         |    |                   |
|-----|------|-----|-------|-------|-------|-------|------|------|-----------------------------------------------------------------------------------------------------------|--------------------|-------------------------------------------------------------------------------------------------------------------------------------------------------------------------------------------------------------------------|----|-------------------|
|     |      |     |       |       |       |       |      |      |                                                                                                           |                    | area                                                                                                                                                                                                                    |    |                   |
| Pan | 2011 | USA | HPFS  | 40-75 | Men   | 37083 | 2438 | SFFQ | self-reported/extra questionnaire/medical records /National Diabetes Data group criteria or death reports | processed red meat | Age, energy intake, Body Mass Index, Alcohol, physical activity, family history of diabetes, Smoking, race, history of hypertension and/or hypercholesterolemia, Menopausal status, Hormone use in women, dietary score | 20 | 1.55 (1.33, 1.81) |
| Pan | 2011 | USA | NHS I | 30-55 | Women | 79570 | 8253 | SFFQ | self-reported/extra questionnaire/medical records /National Diabetes Data group criteria or death reports | processed red meat | Age, energy intake, Body Mass Index, Alcohol, physical activity, family history of diabetes, Smoking, race, history of hypertension and/or Hypercholesterolemia, Menopausal                                             | 28 | 1.30 (1.20, 1.41) |

|             |      |     |        |       |           |       |      |      |                                                                                                                                  |                       |                                                                                                                                                                                                                                                                                |     |                      |
|-------------|------|-----|--------|-------|-----------|-------|------|------|----------------------------------------------------------------------------------------------------------------------------------|-----------------------|--------------------------------------------------------------------------------------------------------------------------------------------------------------------------------------------------------------------------------------------------------------------------------|-----|----------------------|
|             |      |     |        |       |           |       |      |      |                                                                                                                                  |                       | status,<br>Hormone use in<br>women, dietary<br>score                                                                                                                                                                                                                           |     |                      |
| Pan         | 2011 | USA | NHS II | 25-42 | Wom<br>en | 87504 | 3068 | SFFQ | self-<br>reported/extra<br>questionnaire/m<br>edical records<br>/National<br>Diabetes Data<br>group criteria or<br>death reports | processed<br>red meat | Age, energy<br>intake, Body<br>Mass Index,<br>Alcohol,<br>physical<br>activity, family<br>history of<br>diabetes,<br>Smoking, race,<br>history of<br>hypertension<br>and/or<br>hypercholeste<br>rolemia,<br>Menopausal<br>status,<br>Hormone use in<br>women, dietary<br>score | 16  | 1.21 (1.07,<br>1.37) |
| Song        | 2004 | USA | WHS    | ≥45   | Wom<br>en | 37309 | 1558 | SFFQ | self-<br>reported/blood<br>sample/ extra<br>questionnaire/A<br>DA diagnostic<br>criteria                                         | processed<br>meat     | Age, energy<br>intake, Body<br>Mass Index,<br>Alcohol,<br>physical<br>activity, family<br>history of<br>diabetes,<br>Smoking, fiber,<br>Mg, GL, total<br>fat                                                                                                                   | 8.8 | 1.19 (1.00,<br>1.42) |
| Steinbreche | 2011 | USA | MEC    | 45-75 | Both      | 75512 | 8587 | FFQ  | self reported or                                                                                                                 | processed             | Age, energy                                                                                                                                                                                                                                                                    | 14  | ♂:                   |

|                 |      |             |                 |       |       |       |      |                                           |                                                  |                |                                                                                                                                                                                                                                                                                                                |      |                                             |
|-----------------|------|-------------|-----------------|-------|-------|-------|------|-------------------------------------------|--------------------------------------------------|----------------|----------------------------------------------------------------------------------------------------------------------------------------------------------------------------------------------------------------------------------------------------------------------------------------------------------------|------|---------------------------------------------|
| r               |      |             |                 |       |       |       |      |                                           | with medication history or with the health plans | red meat       | intake, Body Mass Index, physical activity, Education, Ethnicity                                                                                                                                                                                                                                               |      | 1.44 (1.33, 1.56)<br>♀<br>1.34 (1.24, 1.45) |
| van Woudenbergh | 2012 | Netherlands | Rotterdam Study | ≥55   | Both  | 4366  | 456  | self administrated questionnaire and SFFQ | general practitioner registries                  | processed meat | age, Body Mass Index, sex, smoking, diet prescription, and family history of diabetes, intake of energy, energy-adjusted carbohydrates, energy-adjusted polyunsaturated fatty acids, energy-adjusted fiber, energy-adjusted milk, energy-adjusted cheese, soya, fish, alcohol, and tea, red meat, poultry, CRP | 12.4 | 1.73 (1.16 2.58)                            |
| Villegas        | 2006 | China       | SWHS            | 40-70 | Women | 70609 | 1972 | SFFQ                                      | self reported                                    | processed meat | Age, WHR, energy intake, Body Mass Index, smoking, alcohol, physical activity,                                                                                                                                                                                                                                 | 4.6  | 1.18 (0.99, 1.41)                           |

|  |  |  |  |  |  |  |  |  |  |  |                                                                                                         |  |  |
|--|--|--|--|--|--|--|--|--|--|--|---------------------------------------------------------------------------------------------------------|--|--|
|  |  |  |  |  |  |  |  |  |  |  | vegetable<br>intake, income,<br>education,<br>occupation<br>status,<br>hypertension,<br>chronic disease |  |  |
|--|--|--|--|--|--|--|--|--|--|--|---------------------------------------------------------------------------------------------------------|--|--|

Supplementary Table S12: General study characteristics of the included studies investigating the association between processed meat intake and risk of T2D.

| Author       | Year | Country | Cohort name | Age at entry | Sex   | Sample size | Total cases | Dietary assessment | Outcome assessment                                                                  | Type of SSB                | Adjustment factors                                                                                                                                                                                                                                              | Follow up years | Results (high vs. low intake category)<br>Risk ratio (RR)                                                  |
|--------------|------|---------|-------------|--------------|-------|-------------|-------------|--------------------|-------------------------------------------------------------------------------------|----------------------------|-----------------------------------------------------------------------------------------------------------------------------------------------------------------------------------------------------------------------------------------------------------------|-----------------|------------------------------------------------------------------------------------------------------------|
| Bhupathiraju | 2013 | USA     | NHS         | 38-63        | Women | 74749       | 7370        | SFFQ               | self-reported/extra questionnaire/<br>National Diabetes Data group and ADA criteria | Caffeinated carbonated SSB | Age, time interval, AHEI, adherence to low caloric diet, reported weight gain, energy intake, Body Mass Index, Alcohol, physical activity, family history of diabetes, Smoking, history of hypertension and/or hypercholesterolemia, Postmenopausal hormone use | 24              | Caffeinated carbonated SSB:<br>1.29 (1.14, 1.47)<br><br>Caffeine-free carbonated SSB:<br>1.20 (1.01, 1.42) |
| Bhupathiraju | 2013 | USA     | HPFS        | 40-75        | Men   | 39059       | 2865        | SFFQ               | self-reported/extra questionnaire/<br>National Diabetes Data group and ADA criteria | Caffeinated carbonated SSB | Age, time interval, AHEI, adherence to low caloric diet, reported weight gain, energy intake, Body Mass Index, Alcohol, physical activity, family history of diabetes, Smoking, history of hypertension and/or hypercholesterolemia                             | 22              | Caffeinated carbonated SSB:<br>1.33 (1.10, 1.60)<br><br>Caffeine-free carbonated SSB:<br>1.37 (1.08, 1.74) |

|               |      |         |                                                 |       |      |       |       |                                         |                                                                          |     |                                                                                                                                                                                                                                                                                                                                     |    |                                                    |
|---------------|------|---------|-------------------------------------------------|-------|------|-------|-------|-----------------------------------------|--------------------------------------------------------------------------|-----|-------------------------------------------------------------------------------------------------------------------------------------------------------------------------------------------------------------------------------------------------------------------------------------------------------------------------------------|----|----------------------------------------------------|
|               |      |         |                                                 |       |      |       |       |                                         |                                                                          |     | ia                                                                                                                                                                                                                                                                                                                                  |    |                                                    |
| EPIC-Interact | 2013 | Europe  | EPIC-InterAct                                   | 20-80 | Both | 16154 | 12403 | country specific dietary questionnaires | self reported or care registers or medication use, mortality data        | SSB | Sex, Body Mass Index, energy intake, education, smoking, alcohol, physical activity, artificially sweetened beverages, juice                                                                                                                                                                                                        | NA | 1.29 (1.02 1.63)                                   |
| Eshak         | 2013 | Japan   | JPHC                                            | 40-59 | Both | 27585 | 824   | FFQ                                     | self-reported/extra questionnaire/ National Diabetes Data group criteria | SSB | Age, Body Mass Index, family history of diabetes mellitus, education, occupation, alcohol intake, history of hypertension, leisure-time physical activity, consumption of coffee, consumption of green tea, energy adjusted intakes of dietary magnesium, calcium, vitamin D, rice and total dietary fiber, and total energy intake | 10 | ♂:<br>0.98 (0.68, 1.41)<br>♀:<br>1.79 (1.11, 2.89) |
| Montonen      | 2007 | Finland | Finnish Mobile Clinic Health Examination Survey | 40-60 | Both | 2360  | 91    | dietary history interview               | registration to the Social Insurance Institution                         | SSB | Age, Sex, energy intake, Body Mass Index, smoking, family history of diabetes, Geographic area, physical activity,                                                                                                                                                                                                                  | 12 | 1.60 (0.93, 2.75)                                  |

|          |      |       |                                    |       |       |       |      |      |               |     |                                                                                                                                                                          |     |                                                  |
|----------|------|-------|------------------------------------|-------|-------|-------|------|------|---------------|-----|--------------------------------------------------------------------------------------------------------------------------------------------------------------------------|-----|--------------------------------------------------|
|          |      |       |                                    |       |       |       |      |      |               |     | prudent dietary pattern score, conservative pattern score, serum cholesterol, blood pressure, history of Infraction, Angina pectoris or cardiac failure                  |     |                                                  |
| Odegaard | 2010 | China | The Singapore Chinese Health Study | 45-74 | Both  | 43580 | 2273 | SFFQ | self reported | SSB | Age, Sex, dialect, year of interview, education, energy intake, Body Mass Index, smoking, alcohol, saturated fat, dietary fiber, dairy, juice, coffee, physical activity | 5.7 | 1.34 (1.17, 1.53)                                |
| Palmer   | 2008 | USA   | BWHS                               | 21-69 | Women | 43960 | 2713 | SFFQ | self reported | SSB | Age, family history of diabetes, education, smoking, red meat, processed meat, cereal fiber, GI, coffee, physical activity                                               | 10  | 1.24 (1.06, 1.45)                                |
| Paynter  | 2006 | USA   | ARIC                               | 45-64 | Both  | 12204 | 1437 | SFFQ | self reported | SSB | Age, race, family history of diabetes, Hypertension, education, energy intake, Body Mass Index, WHR, smoking, alcohol, dietary fiber,                                    | 12  | ♂<br>1.02 (0.76, 1.37)<br>♀<br>1.07 (0.79, 1.45) |



|         |      |       |        |       |       |       |     |                            |                                                                         |     |                                                                                                                                                                                                                                         |     |                   |
|---------|------|-------|--------|-------|-------|-------|-----|----------------------------|-------------------------------------------------------------------------|-----|-----------------------------------------------------------------------------------------------------------------------------------------------------------------------------------------------------------------------------------------|-----|-------------------|
|         |      |       |        |       |       |       |     |                            |                                                                         |     | physical activity, using diagnosis/medication for outcome classification                                                                                                                                                                |     |                   |
| Sakurai | 2014 | Japan | NA     | 35-55 | Men   | 2037  | 170 | diet history questionnaire | HbA1c measurement/ADA criteria                                          | SSB | Age, family history of diabetes, Hypertension, Dyslipidemia, diet treatment for chronic disease, energy intake, Body Mass Index, smoking, alcohol, dietary fiber, physical activity, diet soda, fruit juice, vegetable juice, coffee    | 5.5 | 1.34 (0.72, 2.49) |
| Schulze | 2004 | USA   | NHS II | 26-46 | Women | 91249 | 741 | SFFQ                       | self-reported/extra questionnaire/National Diabetes Data group criteria | SSB | Age, smoking, alcohol, family history of diabetes, physical activity, polyunsaturated to saturated ratio, trans fat, magnesium, cereal fiber, diet soft drinks, fruit juice, fruit punch, postmenopausal hormone use, contraceptive use | 8   | 1.83 (1.42, 2.36) |

Supplementary Table S13: General study characteristics of the included studies investigating the association between sugar sweetened beverages intake and risk of T2D.

| Dietary factor            | No of studies | RR   | 95% CI     | I <sup>2</sup> (%)<br>95% CI |
|---------------------------|---------------|------|------------|------------------------------|
| Whole grains              |               |      |            |                              |
| High vs. low              | 13            | 0.77 | 0.71, 0.84 | 86 (78, 91)                  |
| Dose-response             | 12            | 0.87 | 0.82, 0.93 | 91 (86, 94)                  |
| Low risk of bias          | 8             | 0.85 | 0.79, 0.92 | 92                           |
| Gender                    |               |      |            |                              |
| Women                     | 5             | 0.85 | 0.77, 0.93 | 92                           |
| Men                       | 2             | 0.78 | 0.70, 0.88 | 58                           |
| Men and women             | 5             | 0.95 | 0.91, 0.99 | 48                           |
| Age                       |               |      |            |                              |
| <50                       | 3             | 0.78 | 0.68, 0.91 | 87                           |
| ≥50                       | 9             | 0.90 | 0.84, 0.96 | 91                           |
| Follow-up                 |               |      |            |                              |
| <10 years                 | 6             | 0.92 | 0.88, 0.98 | 71                           |
| ≥10 years                 | 6             | 0.82 | 0.74, 0.91 | 93                           |
| Geographic location       |               |      |            |                              |
| Europe                    | 4             | 0.94 | 0.90, 0.98 | 53                           |
| America                   | 7             | 0.83 | 0.76, 0.90 | 89                           |
| Asia & Australia          | 1             | 1.00 | 0.92, 1.08 | NA                           |
| Number of cases           |               |      |            |                              |
| <1000                     | 3             | 0.92 | 0.84, 1.02 | 73                           |
| ≥1000                     | 9             | 0.86 | 0.80, 0.92 | 92                           |
| Dietary assessment method |               |      |            |                              |
| FFQ                       | 10            | 0.85 | 0.79, 0.92 | 90                           |
| 24h-recall/Food records   | 2             | 0.96 | 0.92, 0.99 | 0                            |
| Outcome assessment        |               |      |            |                              |

|                        |   |      |            |    |
|------------------------|---|------|------------|----|
| Self-reported          | 7 | 0.83 | 0.76, 0.90 | 89 |
| Diagnosed by physician | 3 | 0.93 | 0.84, 1.02 | 73 |
| Registry               | 2 | 0.96 | 0.92, 0.99 | 0  |

Supplementary Table S14. Dose-response meta-analysis for each 30 g/d increase in whole grains and risk of type 2 diabetes, stratified by low risk of bias studies, high vs. low intake, gender, follow-up, geographic location, number of cases, dietary assessment method, and outcome assessment

| Dietary factor            | No of studies | RR   | 95% CI     | I <sup>2</sup> (%)<br>95% CI |
|---------------------------|---------------|------|------------|------------------------------|
| Refined grains            |               |      |            |                              |
| High vs. low              | 15            | 1.01 | 0.92, 1.10 | 54 (16, 74)                  |
| Dose-response             | 14            | 1.01 | 0.99, 1.03 | 59 (23, 78)                  |
| Low risk of bias          | 8             | 1.02 | 1.00, 1.04 | 32                           |
| Gender                    |               |      |            |                              |
| Women                     | 5             | 1.01 | 0.98, 1.04 | 68                           |
| Men                       | 3             | 1.03 | 1.00, 1.07 | 12                           |
| Men and women             | 6             | 1.01 | 0.98, 1.04 | 74                           |
| Age                       |               |      |            |                              |
| <50                       | 4             | 1.04 | 1.01, 1.06 | 0                            |
| ≥50                       | 10            | 1.00 | 0.98, 1.02 | 60                           |
| Follow-up                 |               |      |            |                              |
| <10 years                 | 6             | 1.00 | 0.97, 1.02 | 70                           |
| ≥10 years                 | 8             | 1.02 | 1.00, 1.04 | 37                           |
| Geographic location       |               |      |            |                              |
| Europe                    | 2             | 0.98 | 0.95, 1.02 | 0                            |
| America                   | 8             | 1.02 | 0.99, 1.04 | 67                           |
| Asia & Australia          | 4             | 1.01 | 0.98, 1.04 | 63                           |
| Number of cases           |               |      |            |                              |
| <1000                     | 4             | 1.01 | 0.96, 1.05 | 66                           |
| ≥1000                     | 10            | 1.01 | 0.99, 1.03 | 58                           |
| Dietary assessment method |               |      |            |                              |
| FFQ                       | 12            | 1.01 | 1.00, 1.03 | 61                           |
| 24h-recall/Food records   | 2             | 0.98 | 0.95, 1.02 | 0                            |
| Outcome assessment        |               |      |            |                              |

|                        |   |      |            |    |
|------------------------|---|------|------------|----|
| Self-reported          | 9 | 1.01 | 0.99, 1.03 | 63 |
| Diagnosed by physician | 3 | 1.03 | 0.96, 1.10 | 71 |
| Registry               | 2 | 0.98 | 0.95, 1.02 | 0  |

Supplementary Table S15. Dose-response meta-analysis for each daily 30 g/d increase in refined grains and risk of type 2 diabetes, stratified by low risk of bias studies, high vs. low intake, gender, follow-up, geographic location, number of cases, dietary assessment method, and outcome assessment

| Dietary factor            | No of studies | RR   | 95% CI     | I <sup>2</sup> (%)<br>95% CI |
|---------------------------|---------------|------|------------|------------------------------|
| Vegetables                |               |      |            |                              |
| High vs. low              | 13            | 0.95 | 0.89, 1.01 | 59 (24, 78)                  |
| Dose-response             | 11            | 0.98 | 0.96, 1.00 | 62 (29, 81)                  |
| Low risk of bias          | 5             | 0.99 | 0.97, 1.02 | 42                           |
| Gender                    |               |      |            |                              |
| Women                     | 4             | 0.99 | 0.95, 1.03 | 82                           |
| Men                       | 1             | 0.90 | 0.78, 1.05 | NA                           |
| Men and women             | 6             | 0.98 | 0.97, 0.99 | 0                            |
| Age                       |               |      |            |                              |
| ≥50                       | 11            | 0.98 | 0.96, 1.00 | 62                           |
| Follow-up                 |               |      |            |                              |
| <10 years                 | 5             | 0.98 | 0.94, 1.01 | 70                           |
| ≥10 years                 | 6             | 0.99 | 0.96, 1.02 | 62                           |
| Geographic location       |               |      |            |                              |
| Europe                    | 4             | 0.97 | 0.89, 1.05 | 44                           |
| America                   | 4             | 1.00 | 0.98, 1.02 | 71                           |
| Asia & Australia          | 3             | 0.95 | 0.91, 0.99 | 44                           |
| Number of cases           |               |      |            |                              |
| <1000                     | 4             | 0.96 | 0.93, 1.00 | 0                            |
| ≥1000                     | 7             | 0.99 | 0.97, 1.01 | 74                           |
| Dietary assessment method |               |      |            |                              |
| FFQ                       | 7             | 0.99 | 0.96, 1.01 | 71                           |
| 24h-recall/Food records   | 4             | 0.97 | 0.89, 1.05 | 44                           |
| Outcome assessment        |               |      |            |                              |
| Self-reported             | 7             | 0.99 | 0.96, 1.01 | 75                           |

|                        |   |      |            |   |
|------------------------|---|------|------------|---|
| Diagnosed by physician | 2 | 0.98 | 0.95, 1.01 | 0 |
| Registry               | 2 | 0.89 | 0.80, 1.00 | 0 |

Supplementary Table S16. Dose-response meta-analysis for each 100 g/d increase in vegetables and risk of type 2 diabetes, stratified by low risk of bias studies, high vs. low intake, gender, follow-up, geographic location, number of cases, dietary assessment method, and outcome assessment



| Dietary factor            | No of studies | RR   | 95% CI     | I <sup>2</sup> (%)<br>95% CI |
|---------------------------|---------------|------|------------|------------------------------|
| Fruits                    |               |      |            |                              |
| High vs. low              | 15            | 0.96 | 0.93, 1.00 | 29 (0, 62)                   |
| Dose-reponse              | 13            | 0.98 | 0.97, 1.00 | 21 (0, 58)                   |
| Low risk of bias          | 7             | 0.96 | 0.95, 0.98 | 0                            |
| Gender                    |               |      |            |                              |
| Women                     | 5             | 0.98 | 0.96, 1.01 | 50                           |
| Men                       | 2             | 0.97 | 0.93, 1.02 | 0                            |
| Men and women             | 6             | 0.98 | 0.97, 1.00 | 23                           |
| Age                       |               |      |            |                              |
| <50                       | 2             | 0.96 | 0.93, 0.98 | 0                            |
| ≥50                       | 11            | 0.99 | 0.97, 1.00 | 1                            |
| Follow-up                 |               |      |            |                              |
| <10 years                 | 5             | 1.00 | 0.98, 1.02 | 0                            |
| ≥10 years                 | 8             | 0.97 | 0.96, 0.99 | 35                           |
| Geographic location       |               |      |            |                              |
| Europe                    | 4             | 0.97 | 0.92, 1.01 | 31                           |
| America                   | 6             | 0.98 | 0.96, 1.00 | 40                           |
| Asia & Australia          | 3             | 0.99 | 0.97, 1.02 | 0                            |
| Number of cases           |               |      |            |                              |
| <1000                     | 4             | 0.97 | 0.92, 1.02 | 35                           |
| ≥1000                     | 9             | 0.98 | 0.97, 1.00 | 22                           |
| Dietary assessment method |               |      |            |                              |
| FFQ                       | 9             | 0.99 | 0.97, 1.00 | 16                           |
| 24h-recall/Food records   | 4             | 0.97 | 0.92, 1.01 | 31                           |
| Outcome assessment        |               |      |            |                              |

|                        |   |      |            |    |
|------------------------|---|------|------------|----|
| Self-reported          | 9 | 0.99 | 0.97, 1.00 | 15 |
| Diagnosed by physician | 2 | 0.97 | 0.94, 1.00 | 0  |
| Registry               | 2 | 0.92 | 0.80, 1.06 | 0  |

Supplementary Table S17. Dose-response meta-analysis for each 100 g/d increase in fruits and risk of type 2 diabetes, stratified by low risk of bias studies, high vs. low intake, gender, follow-up, geographic location, number of cases, dietary assessment method, and outcome assessment

| Dietary factor            | No of studies | RR   | 95% CI     | I <sup>2</sup> (%)<br>95% CI |
|---------------------------|---------------|------|------------|------------------------------|
| Nuts                      |               |      |            |                              |
| High vs. low              | 8             | 0.95 | 0.85, 1.05 | 67 (30, 84)                  |
| Dose-reponse              | 7             | 0.89 | 0.71, 1.12 | 77 (52, 89)                  |
| Low risk of bias          | 4             | 0.93 | 0.81, 1.05 | 38                           |
| Gender                    |               |      |            |                              |
| Women                     | 4             | 1.06 | 0.81, 1.38 | 76                           |
| Men                       | 1             | 0.82 | 0.65, 1.04 | NA                           |
| Men and women             | 2             | 0.54 | 0.24, 1.22 | 71                           |
| Age                       |               |      |            |                              |
| <50                       | 3             | 0.45 | 0.15, 1.34 | 84                           |
| ≥50                       | 4             | 0.98 | 0.76, 1.25 | 78                           |
| Follow-up                 |               |      |            |                              |
| <10 years                 | 3             | 0.42 | 0.18, 0.97 | 74                           |
| ≥10 years                 | 4             | 1.04 | 0.86, 1.25 | 70                           |
| Geographic location       |               |      |            |                              |
| Europe                    | 1             | 0.75 | 0.55, 1.01 | NA                           |
| America                   | 4             | 1.04 | 0.86, 1.25 | 70                           |
| Asia & Australia          | 2             | 0.27 | 0.13, 0.56 | 0                            |
| Number of cases           |               |      |            |                              |
| <1000                     | 2             | 0.54 | 0.24, 1.22 | 71                           |
| ≥1000                     | 5             | 1.00 | 0.80, 1.25 | 75                           |
| Dietary assessment method |               |      |            |                              |
| FFQ                       | 7             | 0.89 | 0.71, 1.12 | 77                           |
| Outcome assessment        |               |      |            |                              |
| Self-reported             | 5             | 1.00 | 0.80, 1.25 | 75                           |

|                        |   |      |            |    |
|------------------------|---|------|------------|----|
| Diagnosed by physician | 2 | 0.54 | 0.24, 1.22 | 71 |
|------------------------|---|------|------------|----|

Supplementary Table S18. Dose-response meta-analysis for each 28 g/d increase in nuts and risk of type 2 diabetes, stratified by low risk of bias studies, high vs. low intake, gender, follow-up, geographic location, number of cases, dietary assessment method, and outcome assessment

| Dietary factor            | No of studies | RR   | 95% CI     | I <sup>2</sup> (%)<br>95% CI |
|---------------------------|---------------|------|------------|------------------------------|
| Legumes                   |               |      |            |                              |
| High vs. low              | 12            | 0.96 | 0.87, 1.05 | 85 (75, 91)                  |
| Dose-response             | 12            | 1.00 | 0.92, 1.09 | 87 (79, 92)                  |
| Low risk of bias          | 8             | 1.08 | 0.97, 1.22 | 83                           |
| Gender                    |               |      |            |                              |
| Women                     | 5             | 0.87 | 0.65, 1.15 | 91                           |
| Men                       | 1             | 0.42 | 0.04, 4.01 | NA                           |
| Men and women             | 6             | 1.05 | 0.96, 1.14 | 86                           |
| Age                       |               |      |            |                              |
| <50                       | 2             | 0.65 | 0.57, 0.74 | 0                            |
| ≥50                       | 10            | 1.05 | 0.98, 1.12 | 78                           |
| Follow-up                 |               |      |            |                              |
| <10 years                 | 6             | 0.93 | 0.85, 1.01 | 89                           |
| ≥10 years                 | 6             | 1.19 | 0.91, 1.54 | 78                           |
| Geographic location       |               |      |            |                              |
| Europe                    | 2             | 1.01 | 0.98, 1.03 | 0                            |
| America                   | 6             | 1.17 | 0.90, 1.51 | 82                           |
| Asia & Australia          | 4             | 0.89 | 0.75, 1.14 | 91                           |
| Number of cases           |               |      |            |                              |
| <1000                     | 3             | 1.01 | 0.98, 1.03 | 0                            |
| ≥1000                     | 9             | 1.01 | 0.88, 1.16 | 90                           |
| Dietary assessment method |               |      |            |                              |
| FFQ                       | 11            | 1.00 | 0.91, 1.10 | 88                           |
| 24h-recall/Food records   | 1             | 1.04 | 0.90, 1.20 | NA                           |
| Outcome assessment        |               |      |            |                              |

|                        |   |      |            |    |
|------------------------|---|------|------------|----|
| Self-reported          | 8 | 0.92 | 0.80, 1.05 | 86 |
| Diagnosed by physician | 2 | 1.01 | 0.98, 1.03 | 0  |
| Registry               | 2 | 1.41 | 0.76, 2.60 | 95 |

Supplementary Table S19. Dose-response meta-analysis for each 50 g/d increase in legumes and risk of type 2 diabetes, stratified by low risk of bias studies, high vs. low intake, gender, follow-up, geographic location, number of cases, dietary assessment method, and outcome assessment

| Dietary factor            | No of studies | RR   | 95% CI     | I <sup>2</sup> (%)<br>95% CI |
|---------------------------|---------------|------|------------|------------------------------|
| Eggs                      |               |      |            |                              |
| High vs. low              | 13            | 1.08 | 0.95, 1.22 | 69 (45, 83)                  |
| Dose-response             | 13            | 1.08 | 0.95, 1.22 | 77 (61, 86)                  |
| Low risk of bias          | 8             | 1.04 | 0.87, 1.25 | 85                           |
| Gender                    |               |      |            |                              |
| Women                     | 2             | 1.29 | 0.96, 1.72 | 82                           |
| Men                       | 3             | 0.98 | 0.65, 1.47 | 94                           |
| Men and women             | 8             | 1.04 | 0.93, 1.17 | 29                           |
| Age                       |               |      |            |                              |
| <50                       | 1             | 0.54 | 0.21, 1.40 | NA                           |
| ≥50                       | 12            | 1.09 | 0.96, 1.24 | 78                           |
| Follow-up                 |               |      |            |                              |
| <10 years                 | 3             | 0.96 | 0.84, 1.08 | 0                            |
| ≥10 years                 | 10            | 1.12 | 0.97, 1.30 | 79                           |
| Geographic location       |               |      |            |                              |
| Europe                    | 6             | 0.96 | 0.82, 1.12 | 77                           |
| America                   | 5             | 1.43 | 1.28, 1.61 | 0                            |
| Asia & Australia          | 1             | 0.96 | 0.82, 1.12 | NA                           |
| Number of cases           |               |      |            |                              |
| <1000                     | 5             | 0.91 | 0.65, 1.27 | 80                           |
| ≥1000                     | 8             | 1.17 | 1.05, 1.31 | 70                           |
| Dietary assessment method |               |      |            |                              |
| FFQ                       | 10            | 1.17 | 1.03, 1.32 | 65                           |
| 24h-recall/Food records   | 3             | 0.83 | 0.53, 1.30 | 91                           |
| Outcome assessment        |               |      |            |                              |

|                        |   |      |            |    |
|------------------------|---|------|------------|----|
| Self-reported          | 5 | 1.29 | 1.03, 1.62 | 77 |
| Diagnosed by physician | 4 | 1.06 | 0.93, 1.20 | 5  |
| Registry               | 4 | 0.92 | 0.72, 1.18 | 87 |

Supplementary Table S20. Dose-response meta-analysis for each 50 g/d increase in eggs and risk of type 2 diabetes, stratified by low risk of bias studies, high vs. low intake, gender, follow-up, geographic location, number of cases, dietary assessment method, and outcome assessment



| Dietary factor            | No of studies | RR   | 95% CI     | I <sup>2</sup> (%)<br>95% CI |
|---------------------------|---------------|------|------------|------------------------------|
| Dairy                     |               |      |            |                              |
| High vs. low              | 21            | 0.91 | 0.85, 0.97 | 63 (41, 77)                  |
| Dose-reponse              | 21            | 0.97 | 0.94, 0.99 | 74 (60, 83)                  |
| Low risk of bias          | 12            | 0.97 | 0.95, 1.00 | 82                           |
| Low fat                   | 14            | 0.97 | 0.94, 1.00 | 71                           |
| High fat                  | 14            | 1.00 | 0.96, 1.04 | 69                           |
| Gender                    |               |      |            |                              |
| Women                     | 6             | 0.93 | 0.88, 0.99 | 91                           |
| Men                       | 2             | 0.99 | 0.96, 1.02 | 0                            |
| Men and women             | 13            | 0.98 | 0.95, 1.00 | 34                           |
| Age                       |               |      |            |                              |
| <50                       | 5             | 0.99 | 0.96, 1.02 | 47                           |
| ≥50                       | 16            | 0.95 | 0.93, 0.98 | 77                           |
| Follow-up                 |               |      |            |                              |
| <10 years                 | 10            | 0.89 | 0.83, 0.96 | 79                           |
| ≥10 years                 | 11            | 0.99 | 0.98, 1.01 | 40                           |
| Geographic location       |               |      |            |                              |
| Europe                    | 8             | 0.98 | 0.95, 1.01 | 36                           |
| America                   | 7             | 0.98 | 0.96, 1.00 | 58                           |
| Asia & Australia          | 6             | 0.84 | 0.71, 1.01 | 85                           |
| Number of cases           |               |      |            |                              |
| <1000                     | 11            | 0.90 | 0.84, 0.96 | 79                           |
| ≥1000                     | 10            | 0.99 | 0.98, 1.01 | 45                           |
| Dietary assessment method |               |      |            |                              |
| FFQ                       | 18            | 0.95 | 0.92, 0.98 | 78                           |

|                         |    |      |            |    |
|-------------------------|----|------|------------|----|
| 24h-recall/Food records | 3  | 0.99 | 0.98, 1.00 | 0  |
| Outcome assessment      |    |      |            |    |
| Self-reported           | 13 | 0.96 | 0.93, 1.00 | 81 |
| Diagnosed by physician  | 5  | 0.91 | 0.83, 0.99 | 59 |
| Registry                | 3  | 0.99 | 0.98, 1.00 | 0  |

Supplementary Table S21. Dose-response meta-analysis for each 200 g/d increase in dairy and risk of type 2 diabetes, stratified by low risk of bias studies, high vs. low-fat dairy products, high vs. low intake, gender, follow-up, geographic location, number of cases, dietary assessment method, and outcome assessment

| Dietary factor            | No of studies | RR   | 95% CI     | I <sup>2</sup> (%)<br>95% CI |
|---------------------------|---------------|------|------------|------------------------------|
| Fish                      |               |      |            |                              |
| High vs. low              | 16            | 1.04 | 0.95, 1.13 | 76 (62, 86)                  |
| Dose-response             | 15            | 1.09 | 0.93, 1.28 | 84 (76, 90)                  |
| Low risk of bias          | 9             | 1.20 | 0.99, 1.46 | 83                           |
| Gender                    |               |      |            |                              |
| Women                     | 6             | 1.22 | 0.86, 1.73 | 93                           |
| Men                       | 2             | 1.07 | 0.79, 1.46 | 78                           |
| Men and women             | 7             | 0.97 | 0.86, 1.09 | 85                           |
| Age                       |               |      |            |                              |
| <50                       | 4             | 0.99 | 0.65, 1.52 | 84                           |
| ≥50                       | 11            | 1.11 | 0.93, 1.33 | 84                           |
| Follow-up                 |               |      |            |                              |
| <10 years                 | 4             | 0.87 | 0.79, 0.94 | 0                            |
| ≥10 years                 | 11            | 1.20 | 0.99, 1.45 | 81                           |
| Geographic location       |               |      |            |                              |
| Europe                    | 6             | 0.94 | 0.78, 1.14 | 48                           |
| America                   | 6             | 1.44 | 1.19, 1.74 | 66                           |
| Asia & Australia          | 3             | 0.87 | 0.80, 0.95 | 0                            |
| Number of cases           |               |      |            |                              |
| <1000                     | 6             | 0.90 | 0.69, 1.18 | 35                           |
| ≥1000                     | 9             | 1.14 | 0.93, 1.39 | 89                           |
| Dietary assessment method |               |      |            |                              |
| FFQ                       | 12            | 1.12 | 0.91, 1.39 | 87                           |
| 24h-recall/Food records   | 3             | 0.98 | 0.88, 1.10 | 0                            |
| Outcome assessment        |               |      |            |                              |

|                        |    |      |            |    |
|------------------------|----|------|------------|----|
| Self-reported          | 10 | 1.15 | 0.93, 1.42 | 88 |
| Diagnosed by physician | 1  | 1.00 | 0.82, 1.22 | 5  |
| Registry               | 4  | 0.96 | 0.70, 1.32 | 64 |

Supplementary Table S22. Dose-response meta-analysis for each 100 g/d increase in fish and risk of type 2 diabetes, stratified by low risk of bias studies, high vs. low intake, gender, follow-up, geographic location, number of cases, dietary assessment method, and outcome assessment

| Dietary factor                   | No of studies | RR   | 95% CI     | I <sup>2</sup> (%)<br>95% CI |
|----------------------------------|---------------|------|------------|------------------------------|
| <b>Red meat</b>                  |               |      |            |                              |
| High vs. low                     | 15            | 1.21 | 1.13, 1.30 | 65 (41, 80)                  |
| Dose-response                    | 14            | 1.17 | 1.08, 1.26 | 83 (72, 89)                  |
| Low risk of bias                 | 10            | 1.22 | 1.13, 1.32 | 83                           |
| <b>Gender</b>                    |               |      |            |                              |
| Women                            | 4             | 1.11 | 1.01, 1.22 | 78                           |
| Men                              | 2             | 1.21 | 1.13, 1.29 | 0                            |
| Men and women                    | 8             | 1.18 | 1.01, 1.38 | 82                           |
| <b>Age</b>                       |               |      |            |                              |
| <50                              | 4             | 1.14 | 1.06, 1.22 | 46                           |
| ≥50                              | 10            | 1.19 | 1.06, 1.33 | 84                           |
| <b>Follow-up</b>                 |               |      |            |                              |
| <10 years                        | 5             | 1.01 | 0.82, 1.25 | 73                           |
| ≥10 years                        | 9             | 1.23 | 1.13, 1.33 | 85                           |
| <b>Geographic location</b>       |               |      |            |                              |
| Europe                           | 6             | 1.15 | 1.05, 1.27 | 38                           |
| America                          | 6             | 1.23 | 1.11, 1.36 | 88                           |
| Asia & Australia                 | 2             | 1.03 | 0.63, 1.68 | 89                           |
| <b>Number of cases</b>           |               |      |            |                              |
| <1000                            | 4             | 0.98 | 0.85, 1.13 | 0                            |
| ≥1000                            | 10            | 1.21 | 1.21, 1.32 | 86                           |
| <b>Dietary assessment method</b> |               |      |            |                              |
| FFQ                              | 11            | 1.17 | 1.06, 1.28 | 86                           |
| 24h-recall/Food records          | 3             | 1.19 | 1.04, 1.35 | 52                           |
| <b>Outcome assessment</b>        |               |      |            |                              |

|                        |   |      |            |    |
|------------------------|---|------|------------|----|
| Self-reported          | 7 | 1.20 | 1.08, 1.34 | 91 |
| Diagnosed by physician | 3 | 1.04 | 0.78, 1.38 | 70 |
| Registry               | 4 | 1.16 | 1.04, 1.29 | 15 |

Supplementary Table S23. Dose-response meta-analysis for each 100 g/d increase in red meat and risk of type 2 diabetes, stratified by low risk of bias studies, high vs. low intake, gender, follow-up, geographic location, number of cases, dietary assessment method, and outcome assessment

| Dietary factor            | No of studies | RR   | 95% CI     | I <sup>2</sup> (%)<br>95% CI |
|---------------------------|---------------|------|------------|------------------------------|
| Processed meat            |               |      |            |                              |
| High vs. low              | 14            | 1.27 | 1.20, 1.35 | 55 (18, 75)                  |
| Dose-response             | 14            | 1.37 | 1.22, 1.55 | 87 (81, 92)                  |
| Low risk of bias          | 10            | 1.39 | 1.21, 1.60 | 92                           |
| Gender                    |               |      |            |                              |
| Women                     | 4             | 1.49 | 1.36, 1.63 | 0                            |
| Men                       | 2             | 1.41 | 0.88, 2.26 | 96                           |
| Men and women             | 8             | 1.33 | 1.11, 1.59 | 90                           |
| Age                       |               |      |            |                              |
| <50                       | 4             | 1.43 | 1.27, 1.61 | 24                           |
| ≥50                       | 10            | 1.36 | 1.18, 1.57 | 90                           |
| Follow-up                 |               |      |            |                              |
| <10 years                 | 5             | 1.30 | 1.13, 1.50 | 0                            |
| ≥10 years                 | 9             | 1.39 | 1.20, 1.61 | 92                           |
| Geographic location       |               |      |            |                              |
| Europe                    | 6             | 1.13 | 1.09, 1.18 | 0                            |
| America                   | 6             | 1.65 | 1.47, 1.85 | 54                           |
| Asia & Australia          | 2             | 1.35 | 1.01, 1.79 | 0                            |
| Number of cases           |               |      |            |                              |
| <1000                     | 4             | 1.32 | 1.13, 1.54 | 0                            |
| ≥1000                     | 10            | 1.38 | 1.20, 1.58 | 91                           |
| Dietary assessment method |               |      |            |                              |
| FFQ                       | 11            | 1.47 | 1.25, 1.72 | 87                           |
| 24h-recall/Food records   | 3             | 1.13 | 1.07, 1.19 | 0                            |
| Outcome assessment        |               |      |            |                              |

|                        |   |      |            |    |
|------------------------|---|------|------------|----|
| Self-reported          | 7 | 1.62 | 1.45, 1.81 | 53 |
| Diagnosed by physician | 3 | 1.11 | 1.04, 1.18 | 0  |
| Registry               | 4 | 1.15 | 1.09, 1.22 | 2  |

Supplementary Table S24. Dose-response meta-analysis for each 50 g/d increase in processed meat and risk of type 2 diabetes, stratified by low risk of bias studies, high vs. low intake, gender, follow-up, geographic location, number of cases, dietary assessment method, and outcome assessment



| Dietary factor            | No of studies | RR   | 95% CI     | I <sup>2</sup> (%)<br>95% CI |
|---------------------------|---------------|------|------------|------------------------------|
| Sugar sweetened beverages |               |      |            |                              |
| High vs. low              | 10            | 1.30 | 1.20, 1.40 | 34 (0, 69)                   |
| Dose-response             | 10            | 1.21 | 1.12, 1.31 | 78 (59, 88)                  |
| Low risk of bias          | 8             | 1.24 | 1.14, 1.35 | 79                           |
| Gender                    |               |      |            |                              |
| Women                     | 3             | 1.22 | 1.08, 1.39 | 88                           |
| Men                       | 2             | 1.25 | 1.14, 1.37 | 0                            |
| Men and women             | 5             | 1.22 | 1.04, 1.42 | 80                           |
| Age                       |               |      |            |                              |
| <50                       | 4             | 1.26 | 1.00, 1.58 | 81                           |
| ≥50                       | 6             | 1.20 | 1.09, 1.32 | 79                           |
| Follow-up                 |               |      |            |                              |
| <10 years                 | 3             | 1.53 | 1.35, 1.74 | 0                            |
| ≥10 years                 | 7             | 1.14 | 1.07, 1.21 | 65                           |
| Geographic location       |               |      |            |                              |
| Europe                    | 2             | 1.65 | 0.70, 3.90 | 80                           |
| America                   | 5             | 1.18 | 1.08, 1.29 | 85                           |
| Asia & Australia          | 3             | 1.33 | 1.10, 1.61 | 34                           |
| Number of cases           |               |      |            |                              |
| <1000                     | 4             | 1.45 | 1.10, 1.92 | 63                           |
| ≥1000                     | 6             | 1.16 | 1.09, 1.24 | 76                           |
| Dietary assessment method |               |      |            |                              |
| FFQ                       | 7             | 1.21 | 1.11, 1.32 | 83                           |
| 24h-recall/Food records   | 3             | 1.35 | 0.95, 1.92 | 62                           |

|                        |   |      |            |    |
|------------------------|---|------|------------|----|
| Outcome assessment     |   |      |            |    |
| Self-reported          | 7 | 1.21 | 1.11, 1.32 | 83 |
| Diagnosed by physician | 2 | 1.15 | 1.07, 1.25 | 0  |
| Registry               | 1 | 2.81 | 1.30, 6.09 | NA |

Supplementary Table S25. Dose-response meta-analysis for each 250 ml/d increase in sugar sweetened beverages and risk of type 2 diabetes, stratified by low risk of bias studies, high vs. low intake, gender, follow-up, geographic location, number of cases, dietary assessment method, and outcome assessment

| Dietary factor            | Amount | No of studies | RR   | 95% CI     | I <sup>2</sup> (%) | NutriGrade grading    |
|---------------------------|--------|---------------|------|------------|--------------------|-----------------------|
| Whole grains              | 30g    | 12            | 0.87 | 0.82, 0.93 | 91                 | High <sup>1</sup>     |
| Refined grains            | 30g    | 14            | 1.01 | 0.99, 1.03 | 59                 | Moderate <sup>2</sup> |
| Vegetables                | 100g   | 11            | 0.98 | 0.96, 1.00 | 62                 | Moderate <sup>2</sup> |
| Fruits                    | 100g   | 13            | 0.98 | 0.97, 1.00 | 21                 | Moderate <sup>2</sup> |
| Nuts                      | 28g    | 7             | 0.89 | 0.71, 1.12 | 77                 | Low <sup>3</sup>      |
| Legumes                   | 50g    | 12            | 1.00 | 0.92, 1.09 | 87                 | Low <sup>3</sup>      |
| Eggs                      | 50g    | 13            | 1.08 | 0.95, 1.22 | 77                 | Moderate <sup>2</sup> |
| Dairy                     | 200g   | 21            | 0.97 | 0.94, 0.99 | 74                 | Moderate <sup>2</sup> |
| Fish                      | 100g   | 15            | 1.09 | 0.93, 1.28 | 84                 | Moderate <sup>2</sup> |
| Red meat                  | 100g   | 14            | 1.17 | 1.08, 1.26 | 83                 | High <sup>1</sup>     |
| Processed meat            | 50g    | 14            | 1.37 | 1.22, 1.55 | 88                 | High <sup>1</sup>     |
| Sugar sweetened beverages | 250ml  | 10            | 1.21 | 1.12, 1.31 | 78                 | High <sup>1</sup>     |

Supplementary Table S26: Linear dose-response meta-analysis including 12 dietary factors and the risk of T2D, and NutriGrade grading.

<sup>1</sup>There is high confidence for the effect estimate, and further research probably will not change the confidence in the effect estimate.

<sup>2</sup>There is moderate confidence for the effect estimate, further research could add evidence on the confidence and may change the effect estimate.

<sup>3</sup>There is low confidence for the effect estimate, further research will provide important evidence on the confidence and likely change the effect estimate.

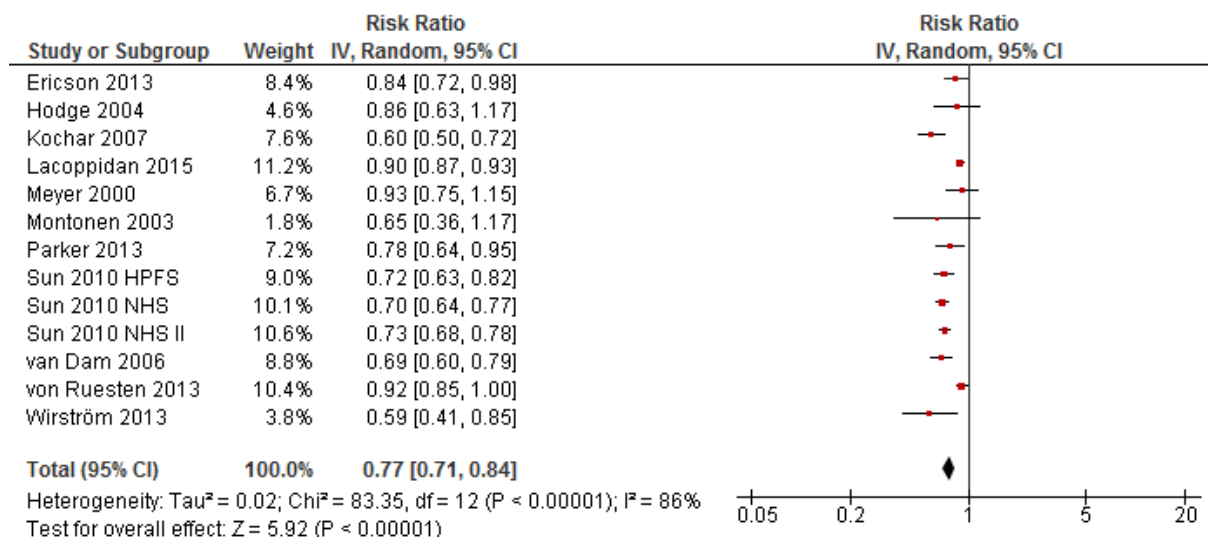

Supplementary Figure S1: Summary of relative risk of type 2 diabetes for high versus low whole grains intake. 95% CI, 95% confidence interval;

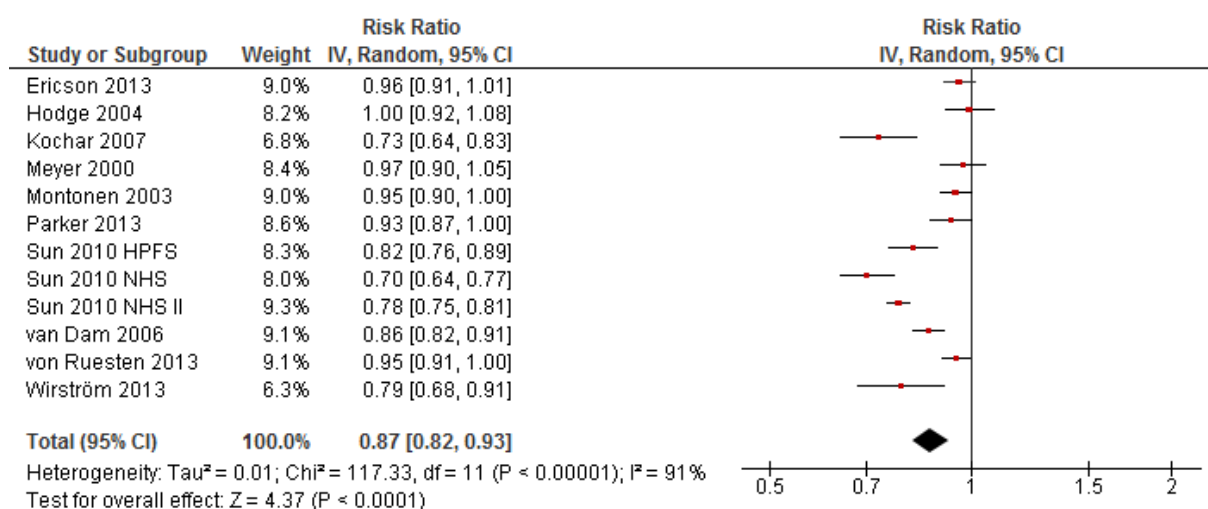

Supplementary Figure S2: Summary of relative risk of type 2 diabetes for each 30g/d increase in whole grains intake. 95% CI, 95% confidence interval;

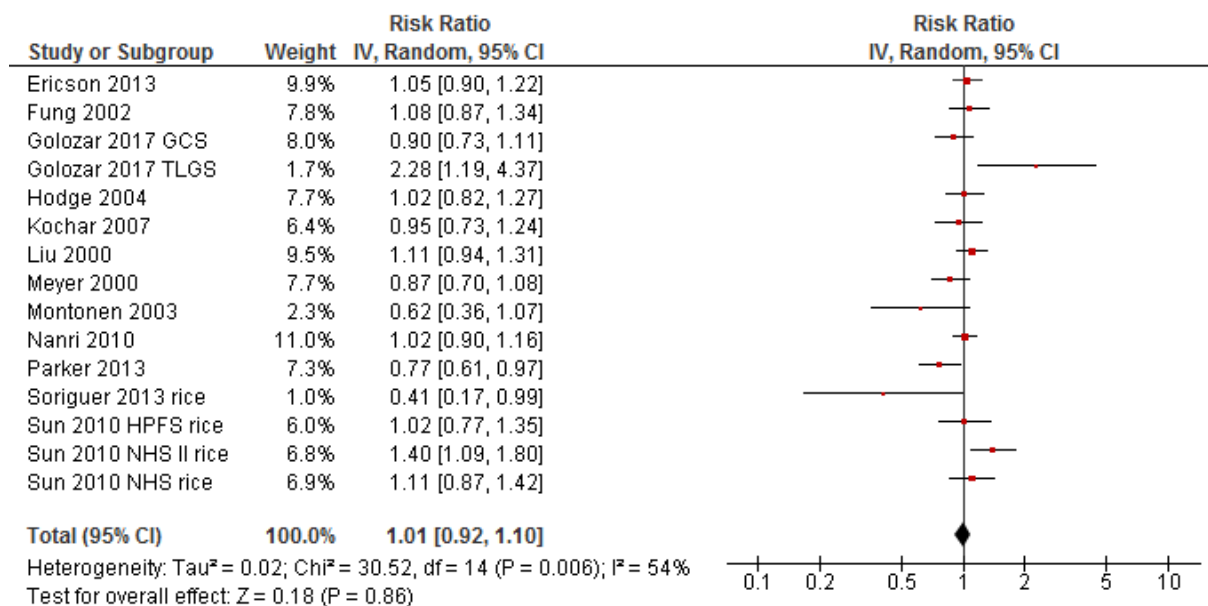

Supplementary Figure S3: Summary of relative risk of type 2 diabetes for high versus low refined grains intake. 95% CI, 95% confidence interval;

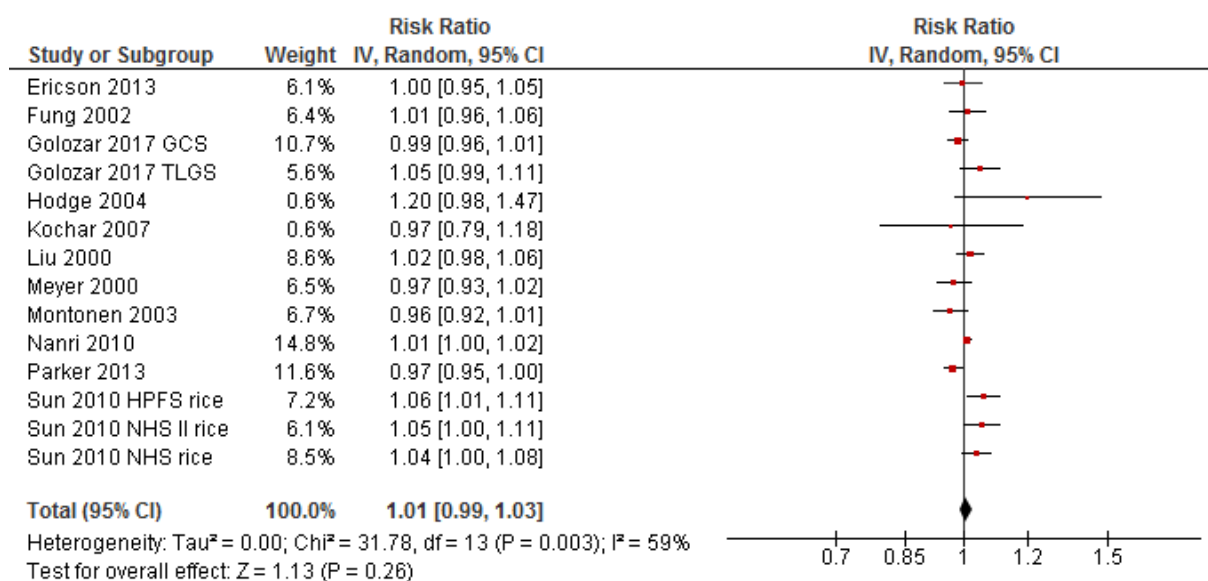

Supplementary Figure S4: Summary of relative risk of type 2 diabetes for each 30 g/d increase in refined grains intake. 95% CI, 95% confidence interval;

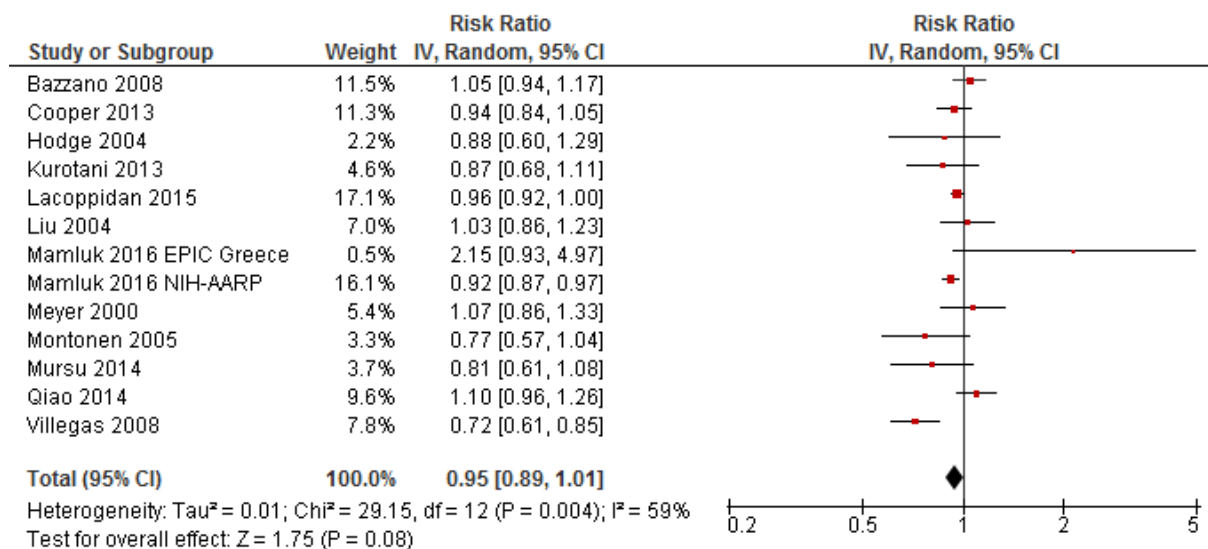

Supplementary Figure S5: Summary of relative risk of type 2 diabetes for high versus low vegetable intake. 95% CI, 95% confidence interval;

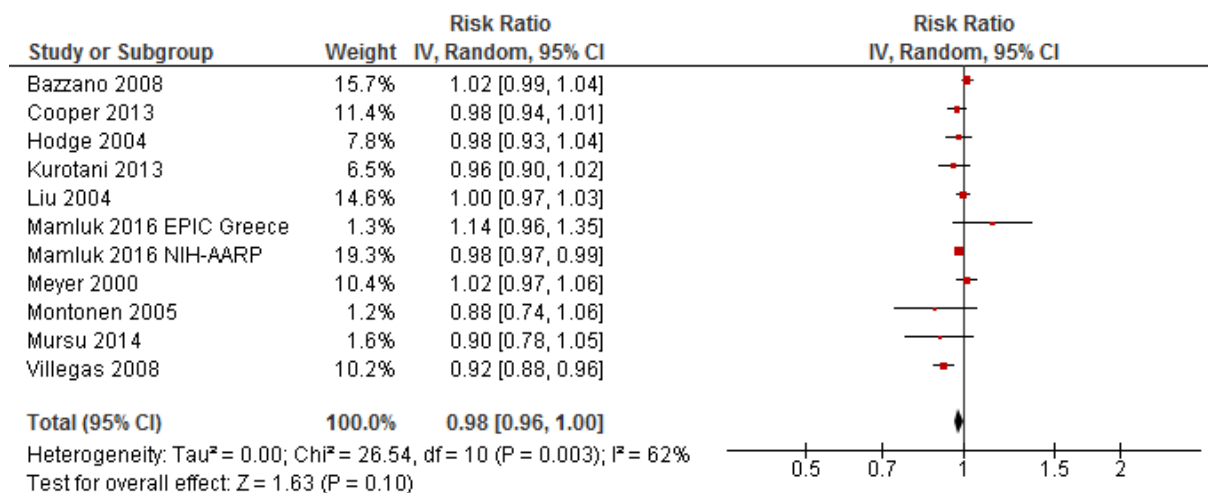

Supplementary Figure S6: Summary of relative risk of type 2 diabetes for each 100g/d increase in vegetable intake. 95% CI, 95% confidence interval;

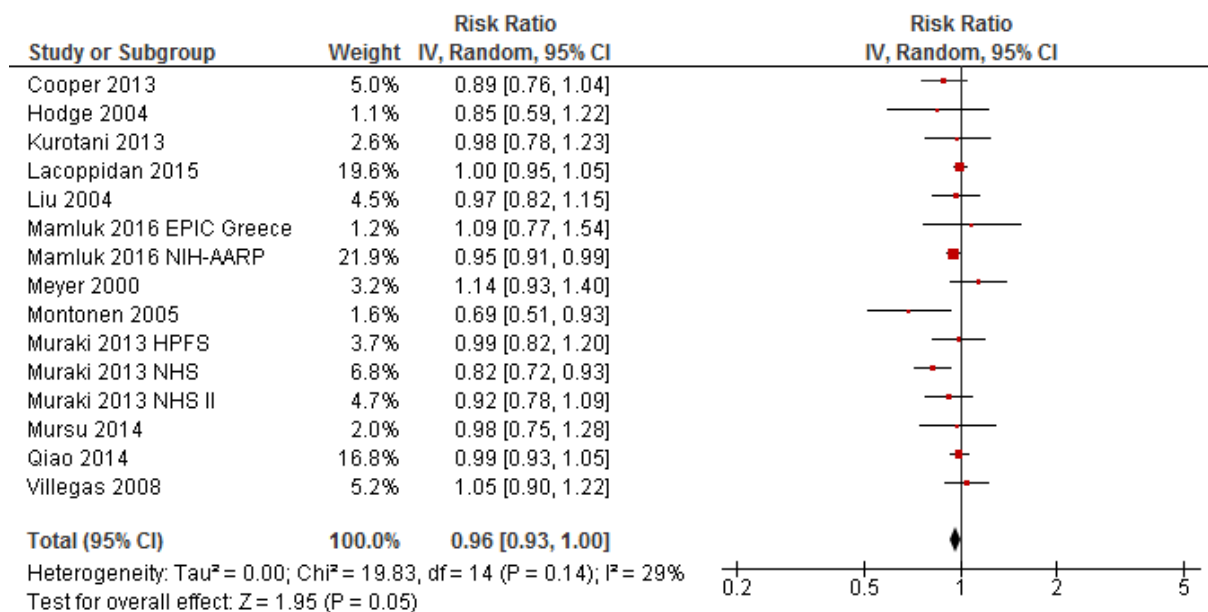

Supplementary Figure S7: Summary of relative risk of type 2 diabetes for high versus low fruit intake. 95% CI, 95% confidence interval;

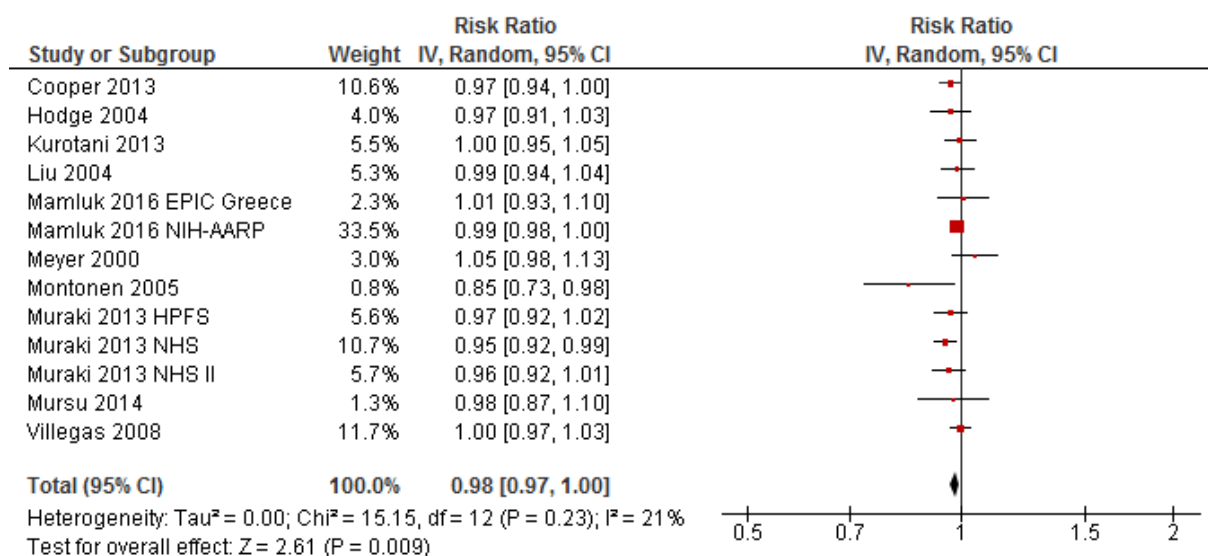

Supplementary Figure S8: Summary of relative risk of type 2 diabetes for each 100g/d increase in fruit intake. 95% CI, 95% confidence interval;

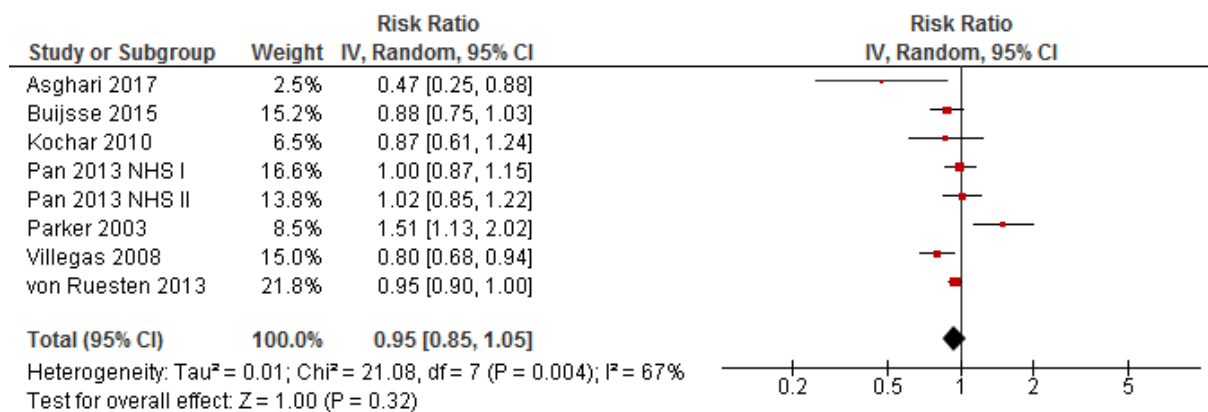

Supplementary Figure S9: Summary of relative risk of type 2 diabetes for high versus low nut intake. 95% CI, 95% confidence interval;

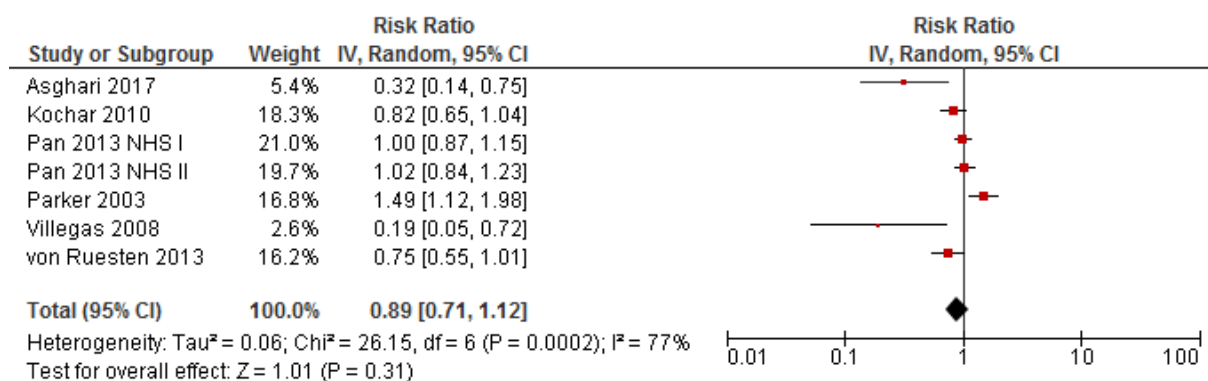

Supplementary Figure S10: Summary of relative risk of type 2 diabetes for each 28 g/d increase in nut intake. 95% CI, 95% confidence interval;



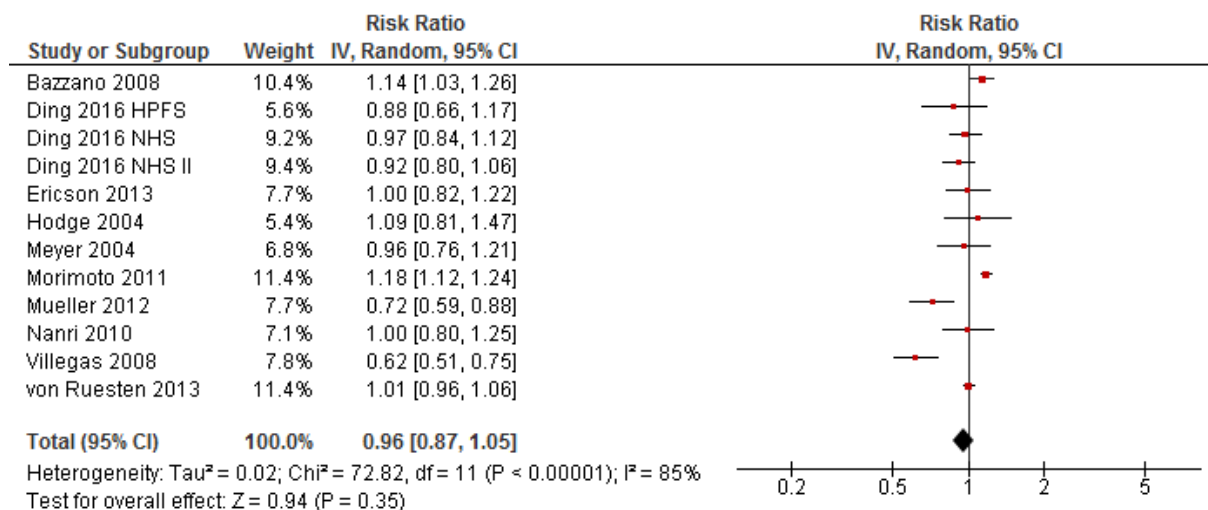

Supplementary Figure S11: Summary of relative risk of type 2 diabetes for high versus low legume intake. 95% CI, 95% confidence interval;

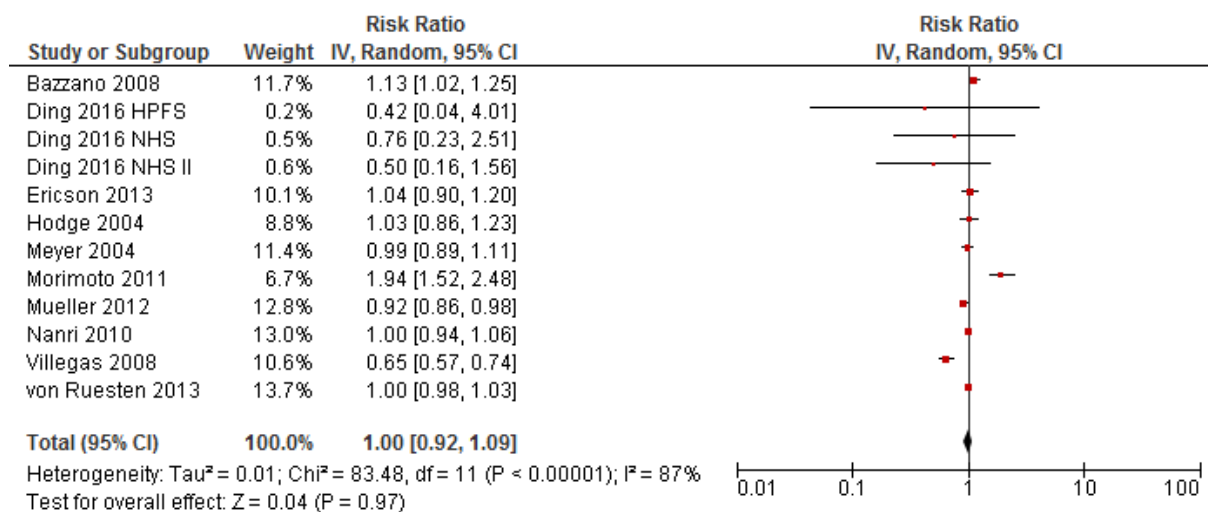

Supplementary Figure S12: Summary of relative risk of type 2 diabetes for each 50 g/d increase in legume intake. 95% CI, 95% confidence interval;

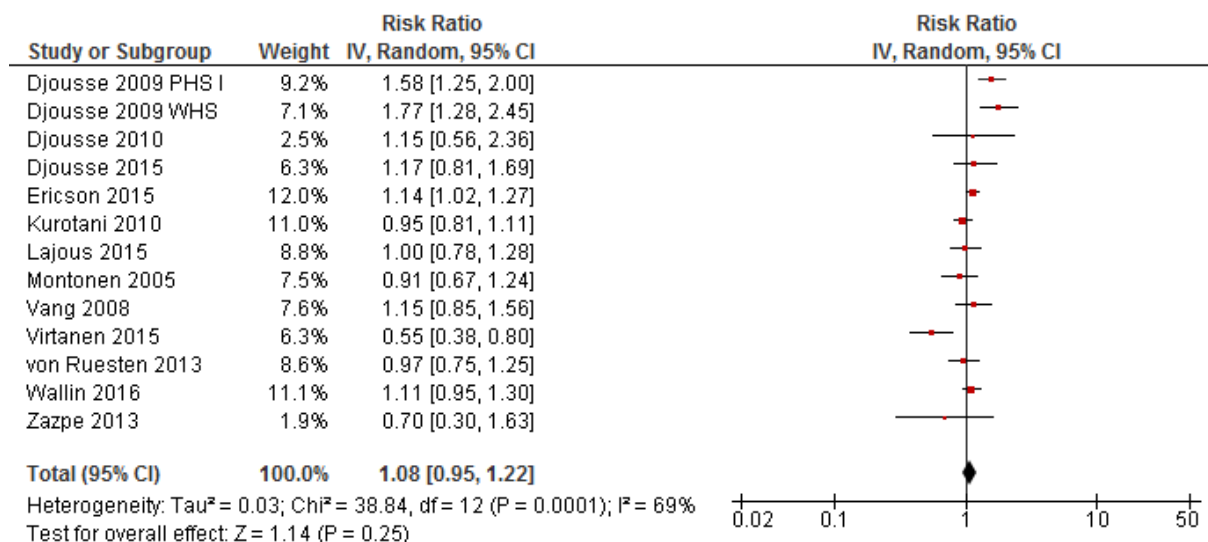

Supplementary Figure S13: Summary of relative risk of type 2 diabetes for high versus low egg intake. 95% CI, 95% confidence interval;

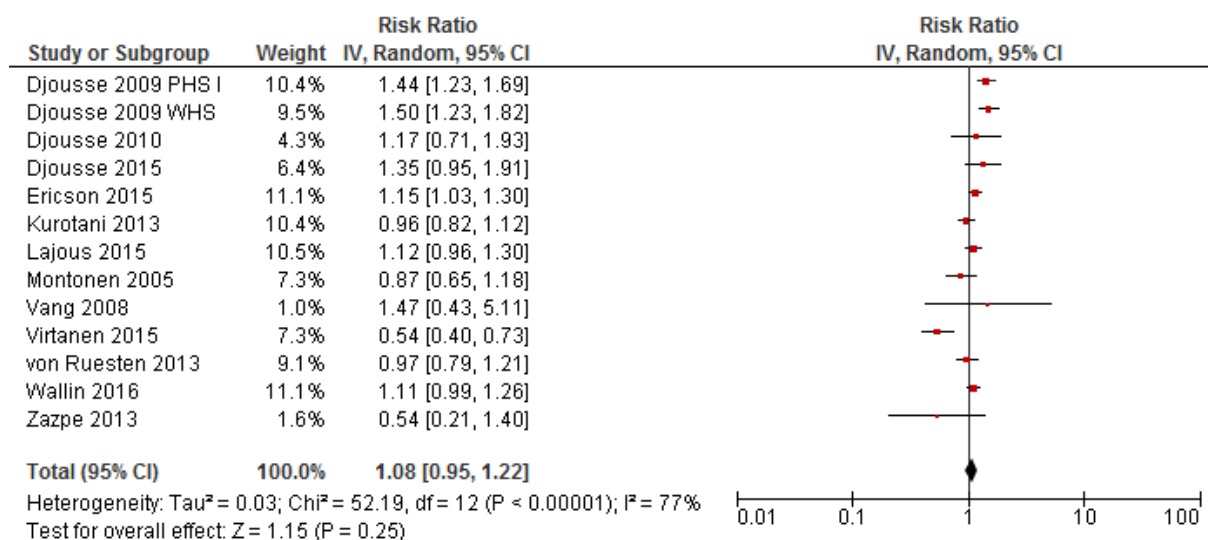

Supplementary Figure S14: Summary of relative risk of type 2 diabetes for each daily 50 g/d increase in egg intake. 95% CI, 95% confidence interval;

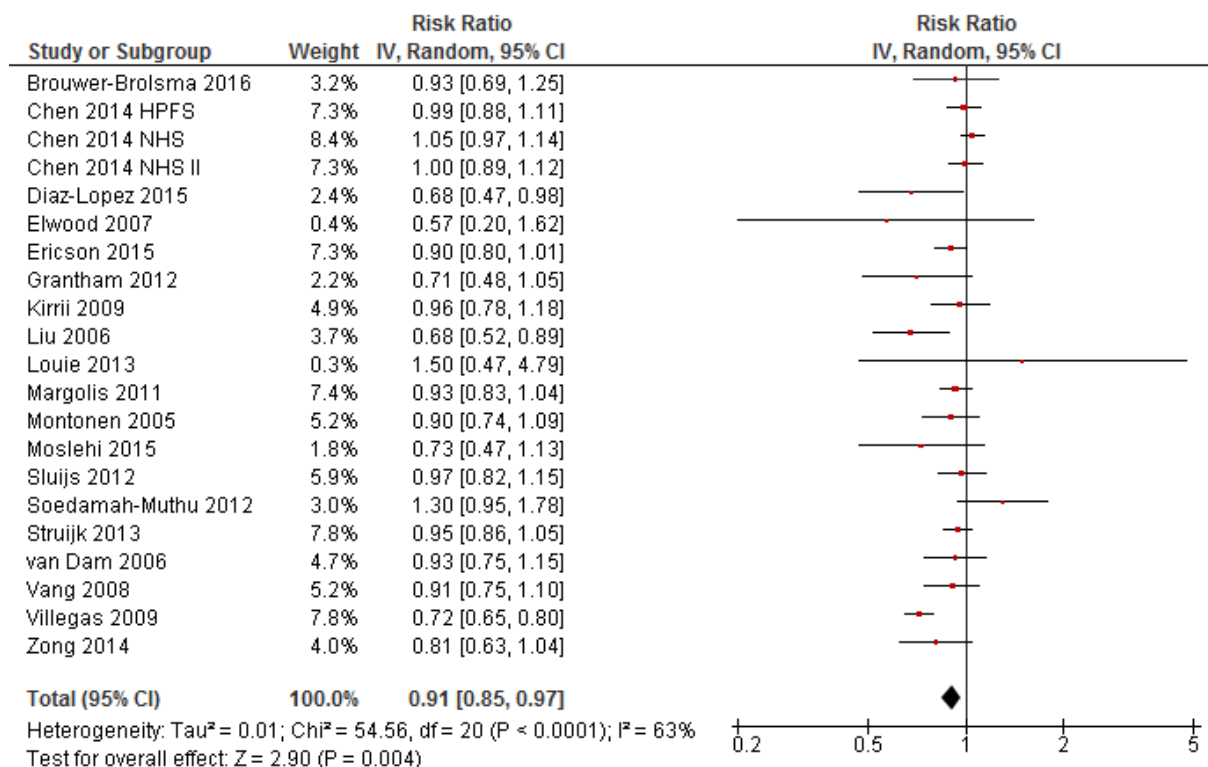

Supplementary Figure S15: Summary of relative risk of type 2 diabetes for high versus low dairy intake. 95% CI, 95% confidence interval;

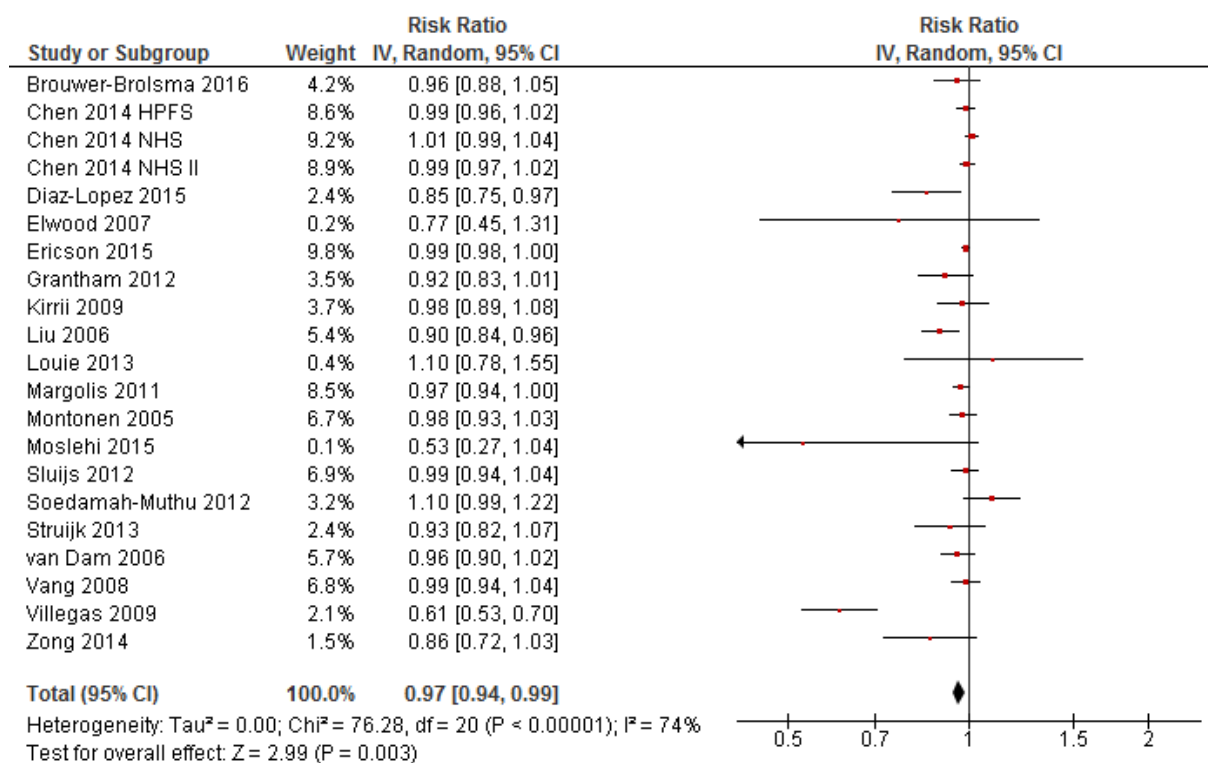

Supplementary Figure S16: Summary of relative risk of type 2 diabetes for each 200 g/d increase in dairy intake. 95% CI, 95% confidence interval;

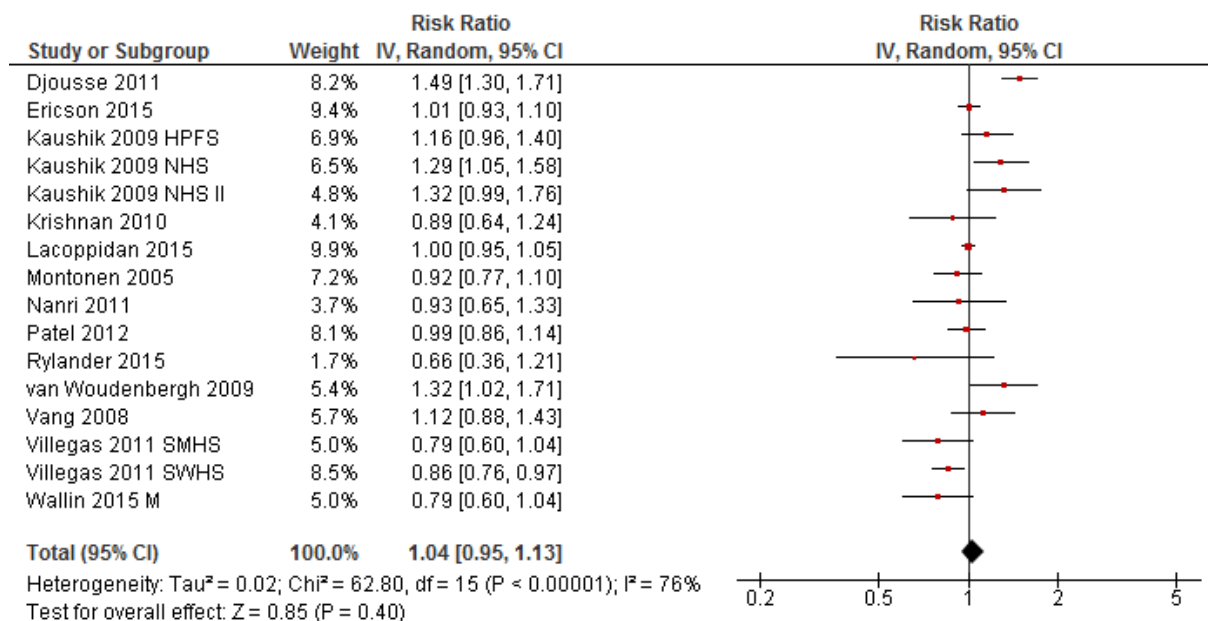

Supplementary Figure S17: Summary of relative risk of type 2 diabetes for high versus low fish intake. 95% CI, 95% confidence interval;

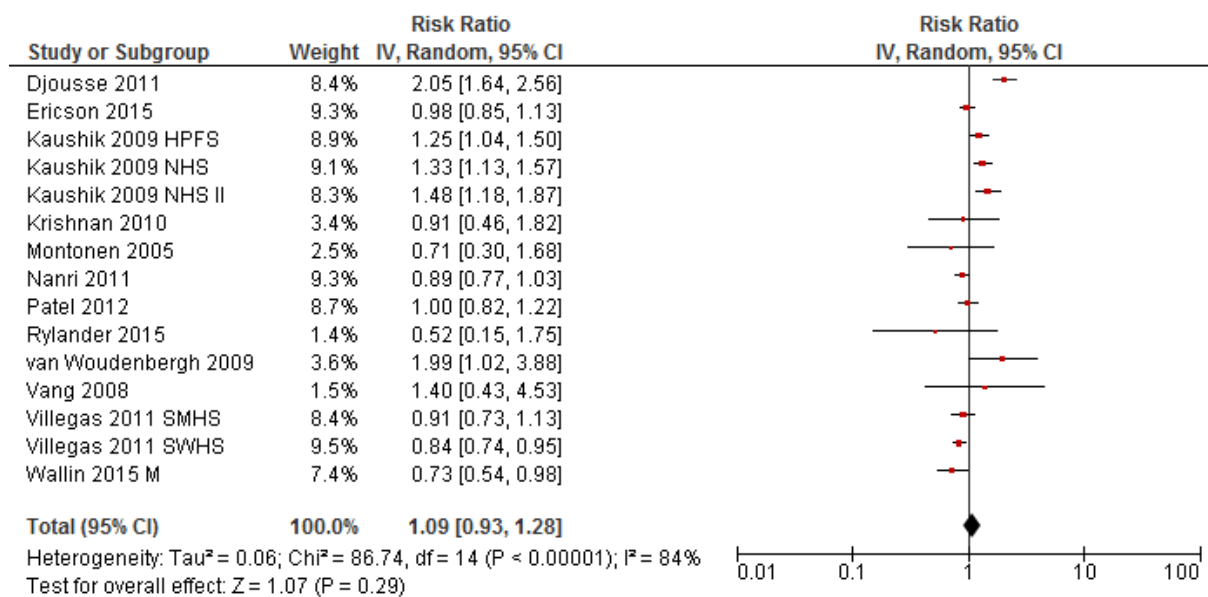

Supplementary Figure S18: Summary of relative risk of type 2 diabetes for each 100 g/d increase in fish intake. 95% CI, 95% confidence interval;

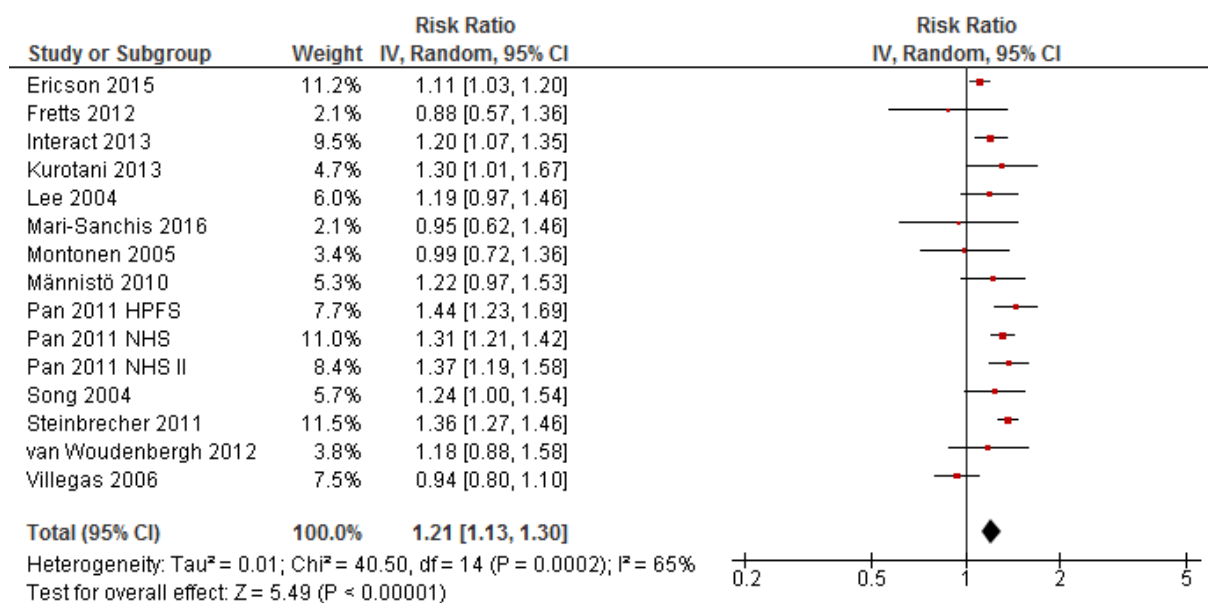

Supplementary Figure S19: Summary of relative risk of type 2 diabetes for high versus low red meat intake. 95% CI, 95% confidence interval;

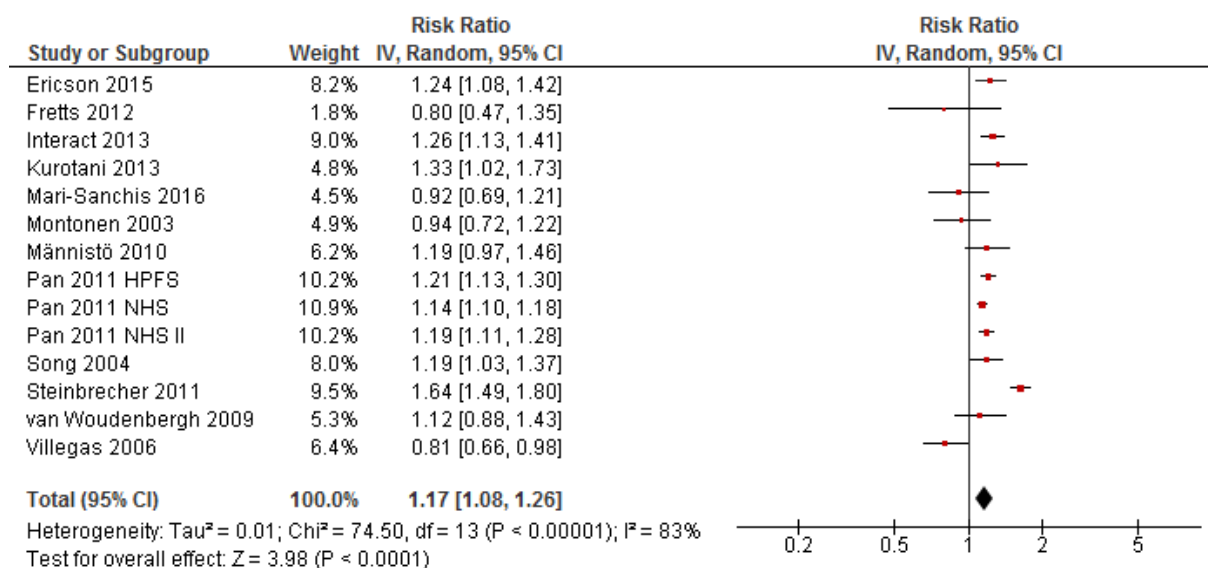

Supplementary Figure S20: Summary of relative risk of type 2 diabetes for each 100 g/d increase in red meat intake. 95% CI, 95% confidence interval;

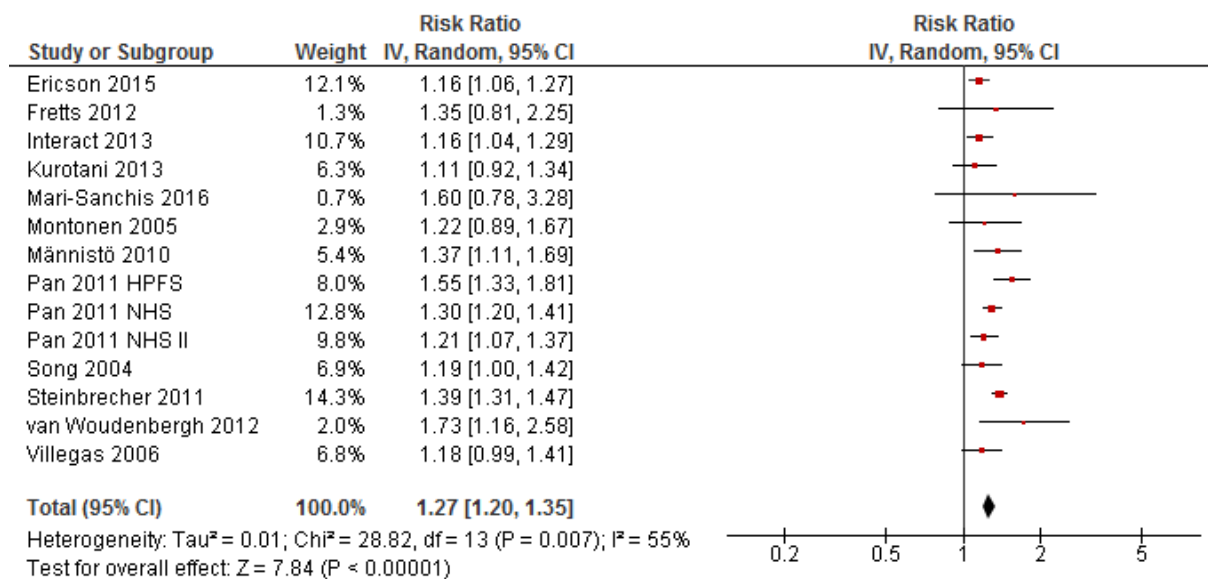

Supplementary Figure S21: Summary of relative risk of type 2 diabetes for high versus low processed meat intake. 95% CI, 95% confidence interval;

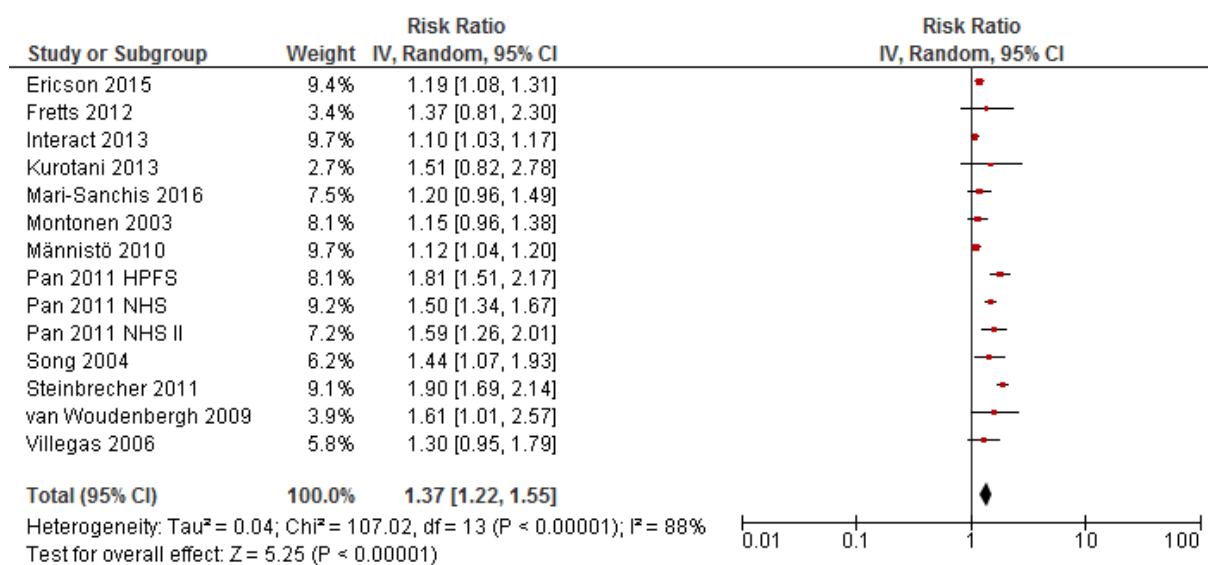

Supplementary Figure S22: Summary of relative risk of type 2 diabetes for each 50 g/d increase in processed meat intake. 95% CI, 95% confidence interval;

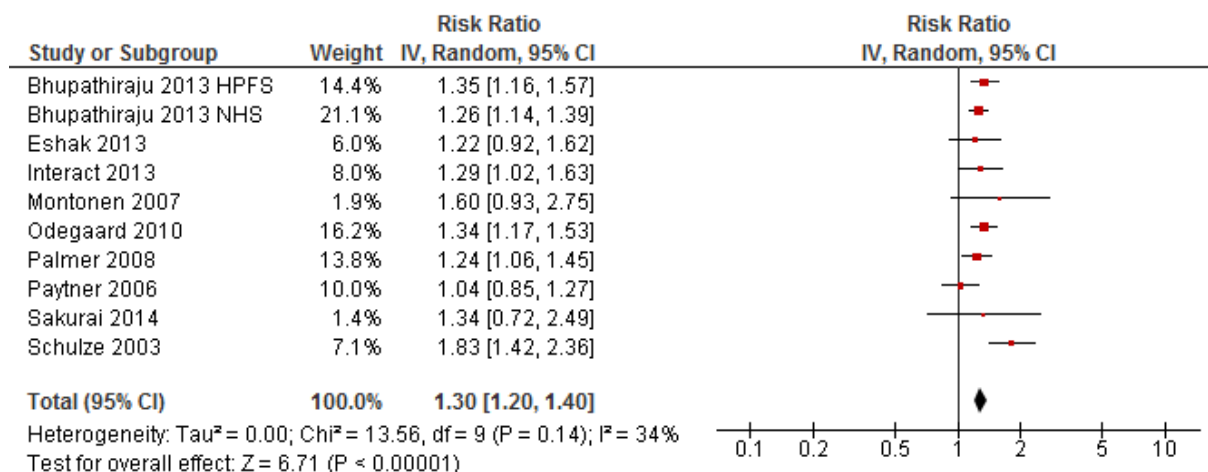

Supplementary Figure S23: Summary of relative risk of type 2 diabetes for high versus low sugar sweetened beverage intake. 95% CI, 95% confidence interval;

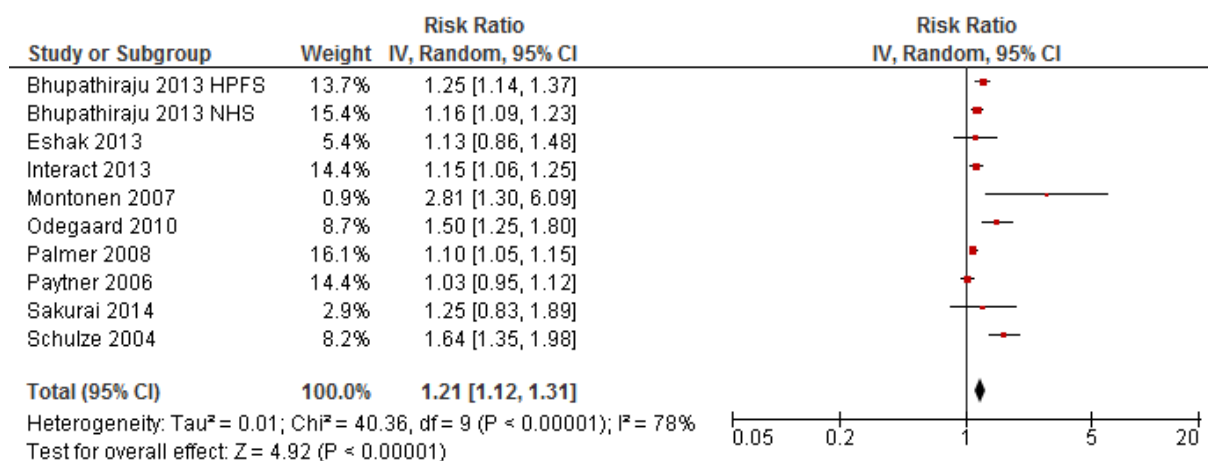

Supplementary Figure S24: Summary of relative risk of type 2 diabetes for each 250 ml/d increase in sugar sweetened beverages intake. 95% CI, 95% confidence interval;

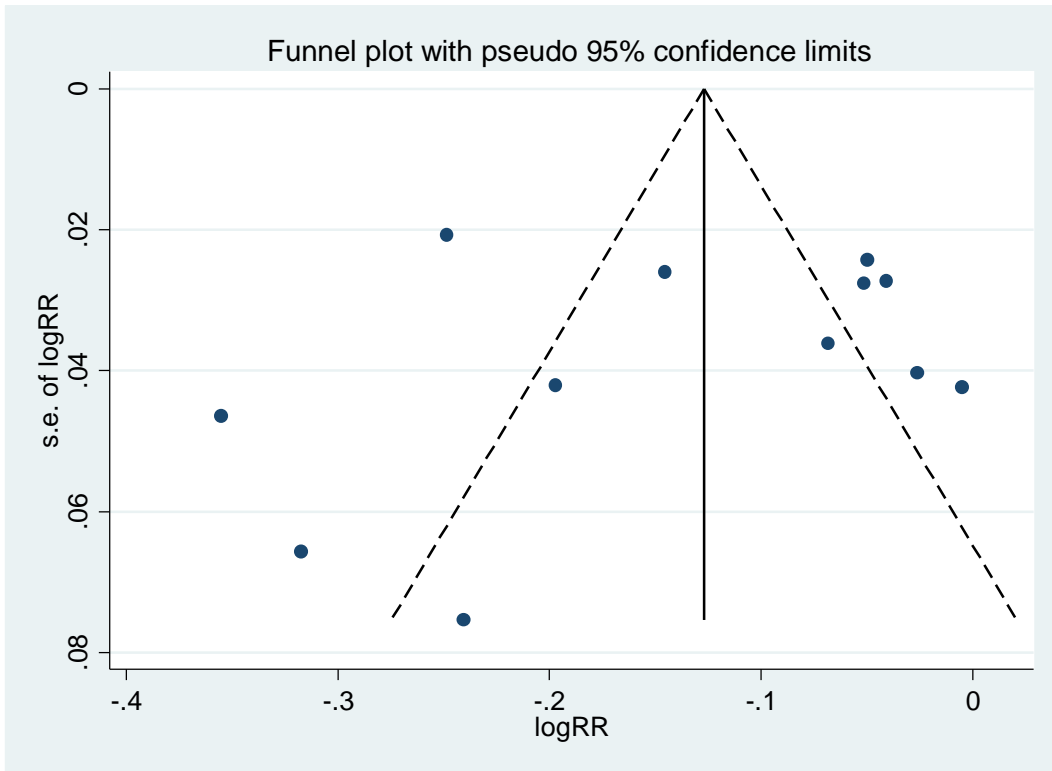

Supplementary Figure S25: Funnel plot showing study precision against the relative risk with 95% CIs for whole grain intake (dose-response meta-analysis) and risk of T2D. SE = Standard error



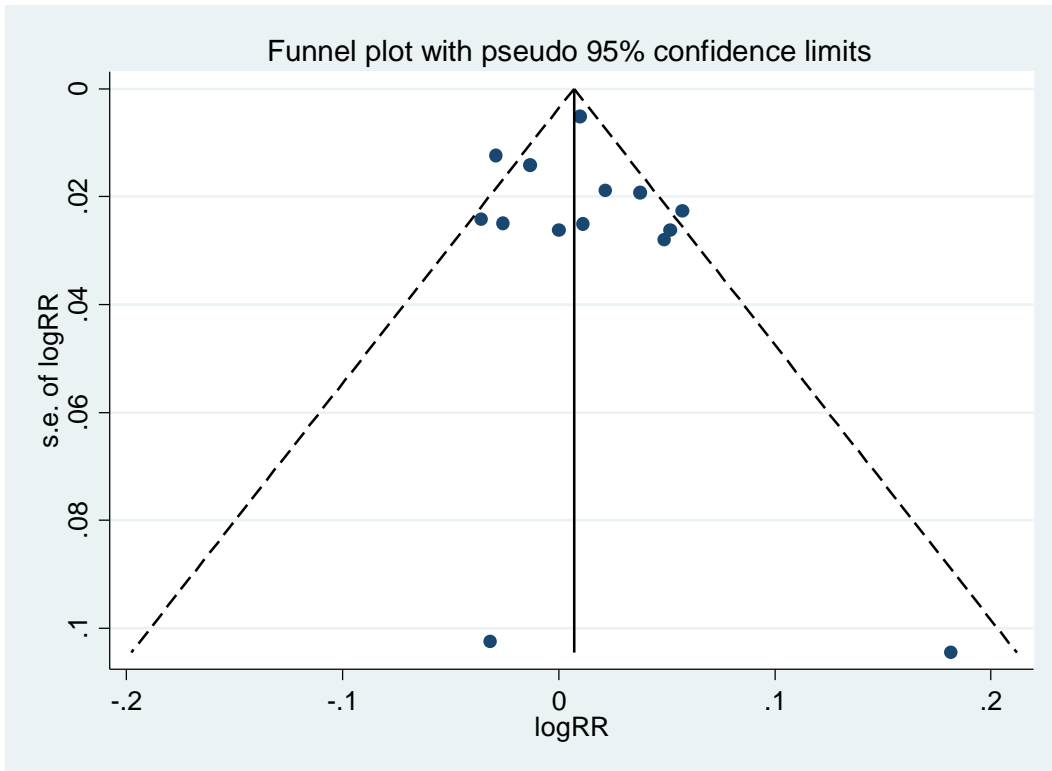

Supplementary Figure S26: Funnel plot showing study precision against the relative risk with 95% CIs for refined grain intake (dose-response meta-analysis) and risk of T2D. SE = Standard error

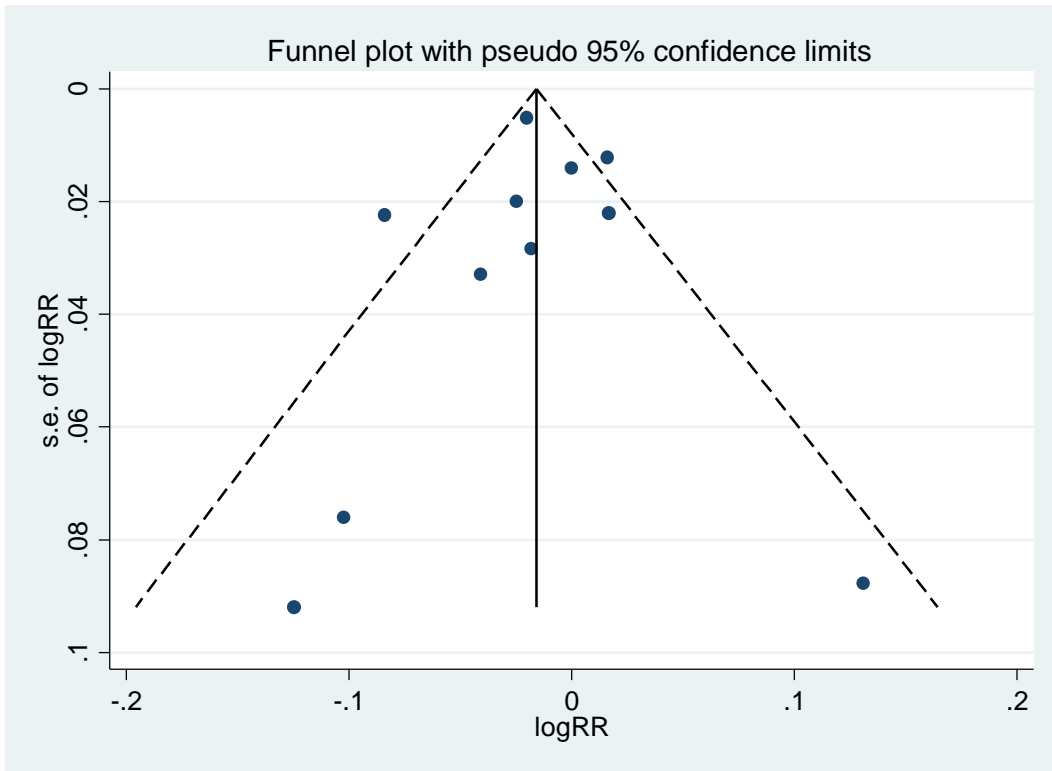

Supplementary Figure S27: Funnel plot showing study precision against the relative risk with 95% CIs for vegetable intake (dose-response meta-analysis) and risk of T2D. SE = Standard error

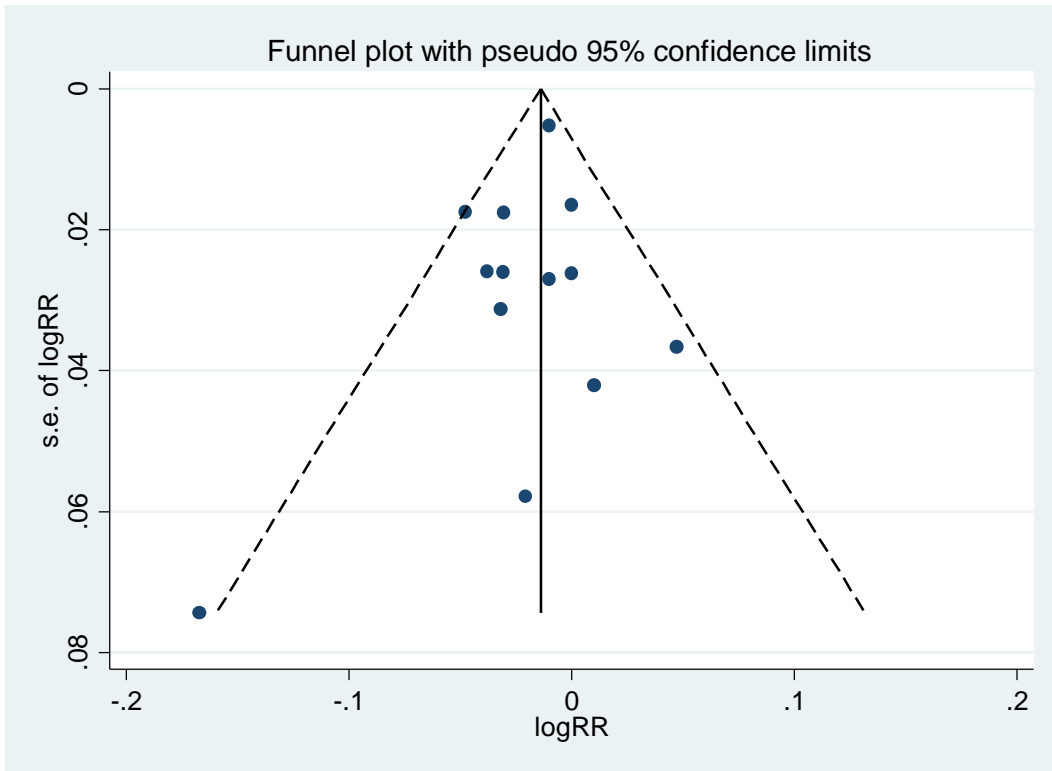

Supplementary Figure S28: Funnel plot showing study precision against the relative risk with 95% CIs for fruit intake (dose-response meta-analysis) and risk of T2D. SE = Standard error

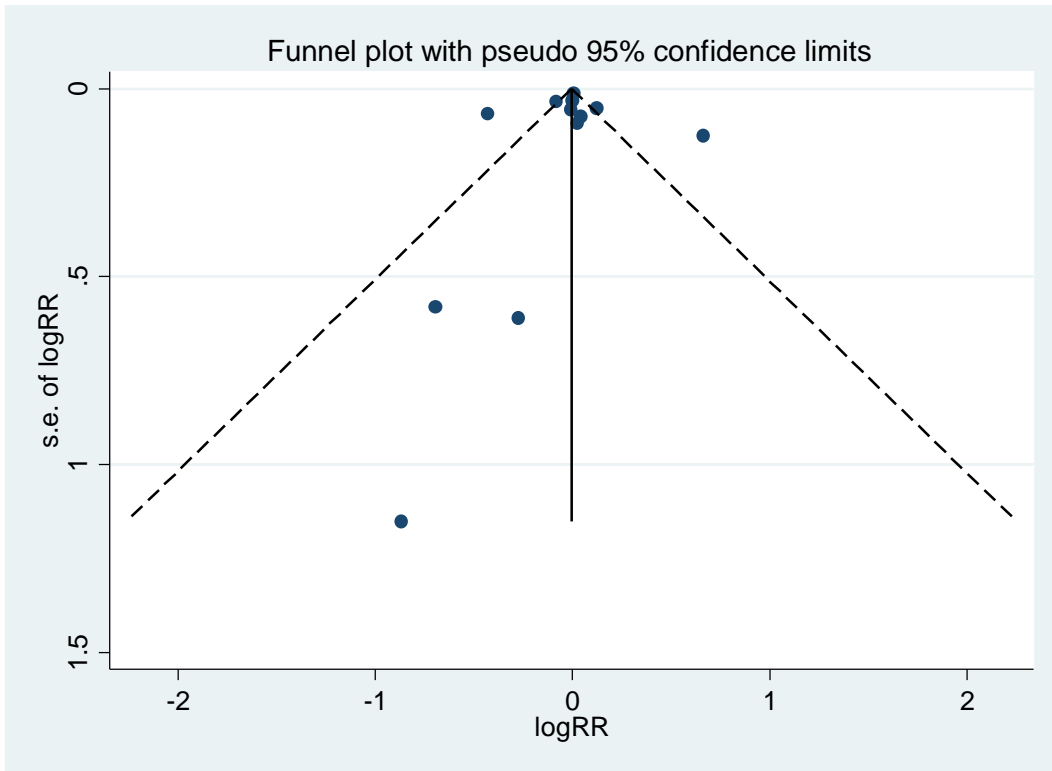

Supplementary Figure S29: Funnel plot showing study precision against the relative risk with 95% CIs for legumes intake (dose-response meta-analysis) and risk of T2D. SE = Standard error

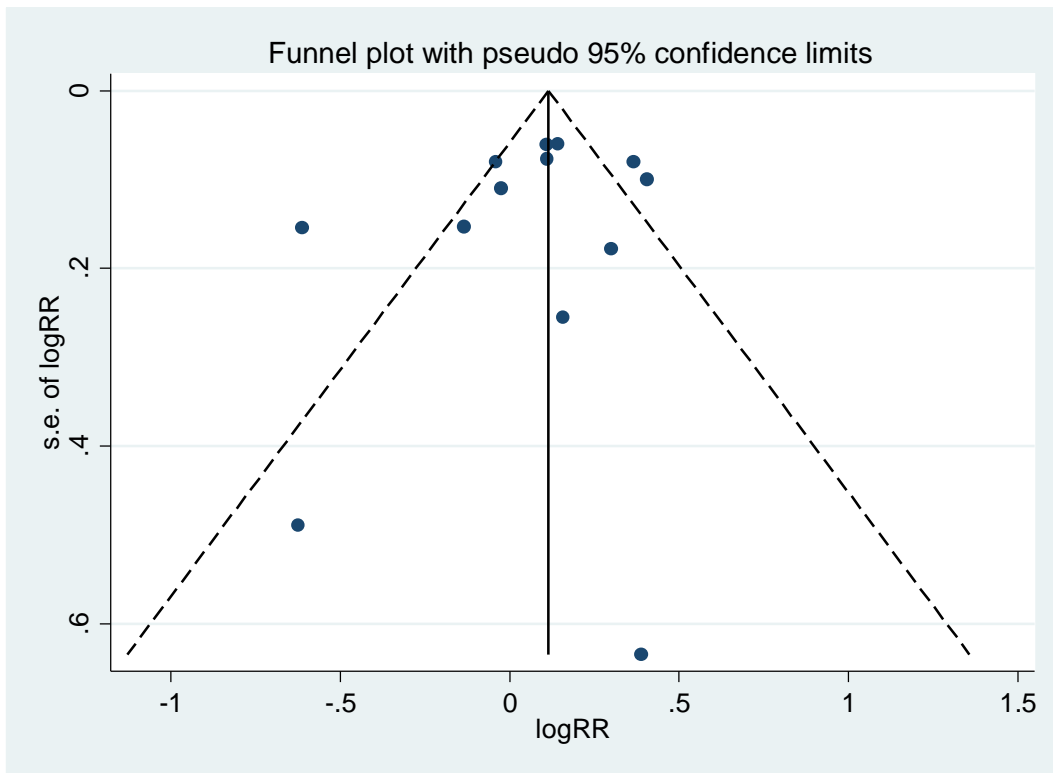

Supplementary Figure S30: Funnel plot showing study precision against the relative risk with 95% CIs for egg intake (dose-response meta-analysis) and risk of T2D. SE = Standard error

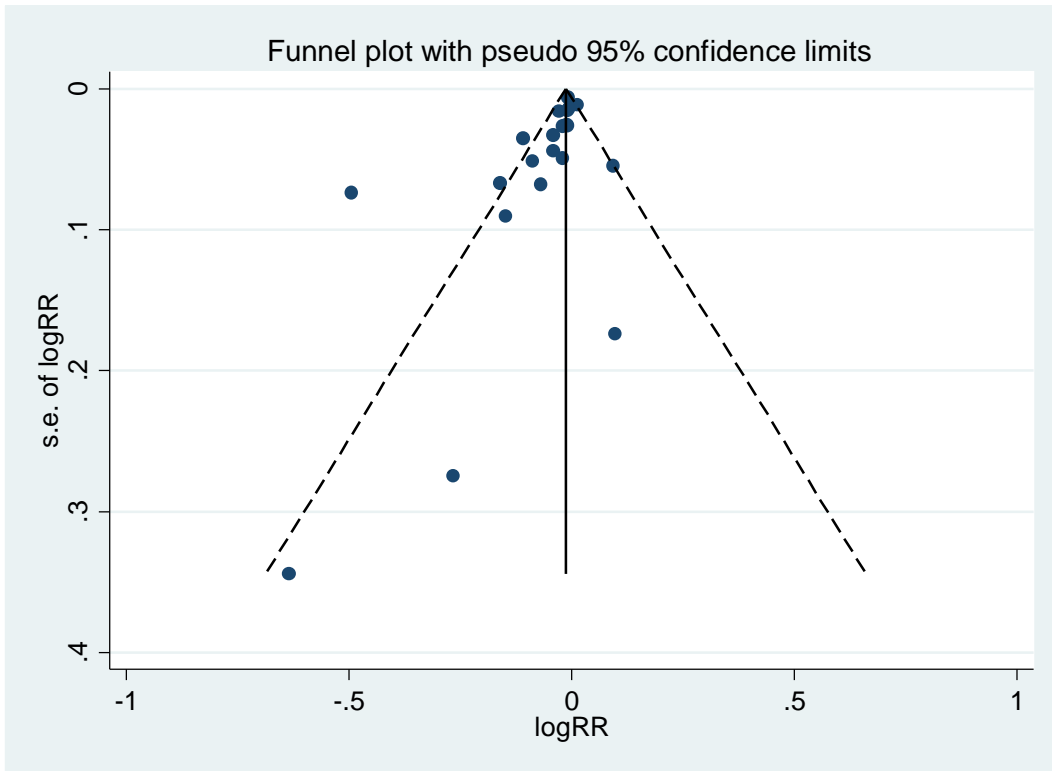

Supplementary Figure S31: Funnel plot showing study precision against the relative risk with 95% CIs for dairy intake (dose-response meta-analysis) and risk of T2D. SE = Standard error

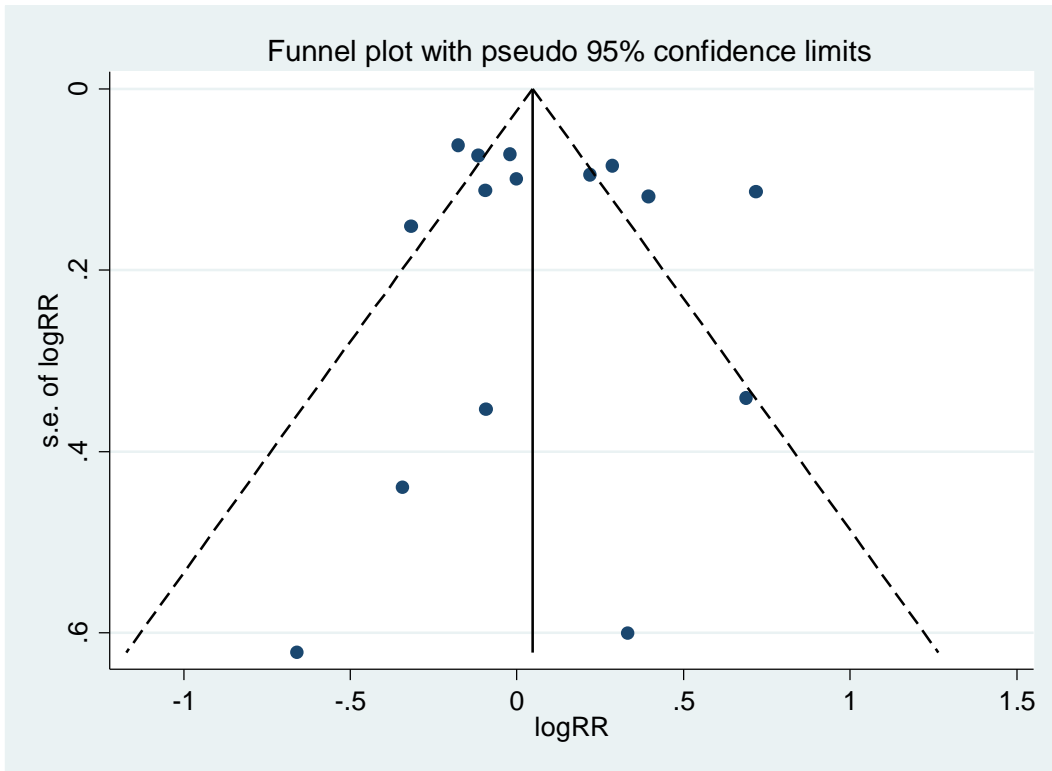

Supplementary Figure S32: Funnel plot showing study precision against the relative risk with 95% CIs for fish intake (dose-response meta-analysis) and risk of T2D. SE = Standard error

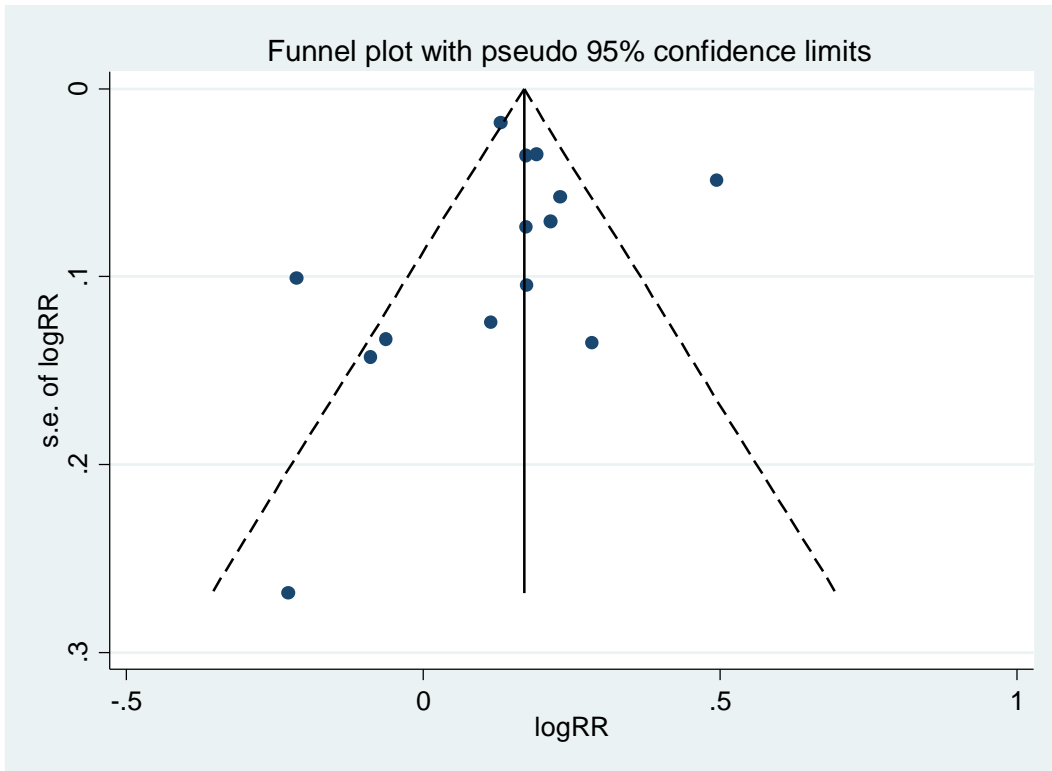

Supplementary Figure S33: Funnel plot showing study precision against the relative risk with 95% CIs for red meat intake (dose-response meta-analysis) and risk of T2D. SE = Standard error



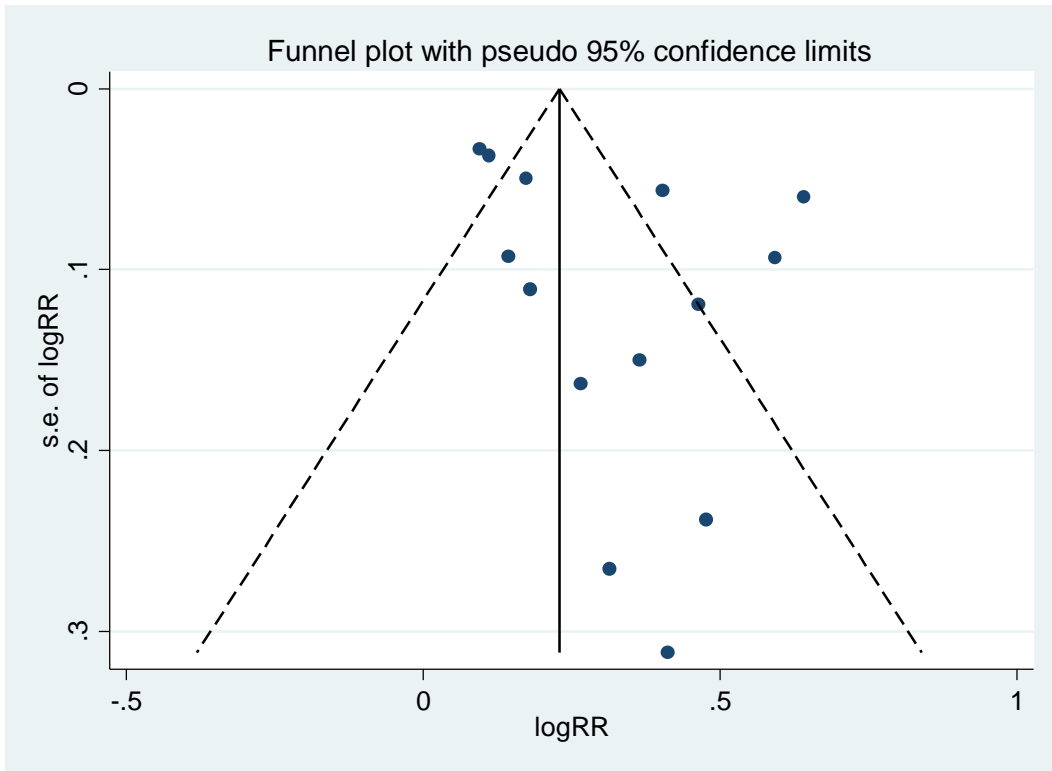

Supplementary Figure S34: Funnel plot showing study precision against the relative risk with 95% CIs for processed meat intake (dose-response meta-analysis) and risk of T2D. SE = Standard error

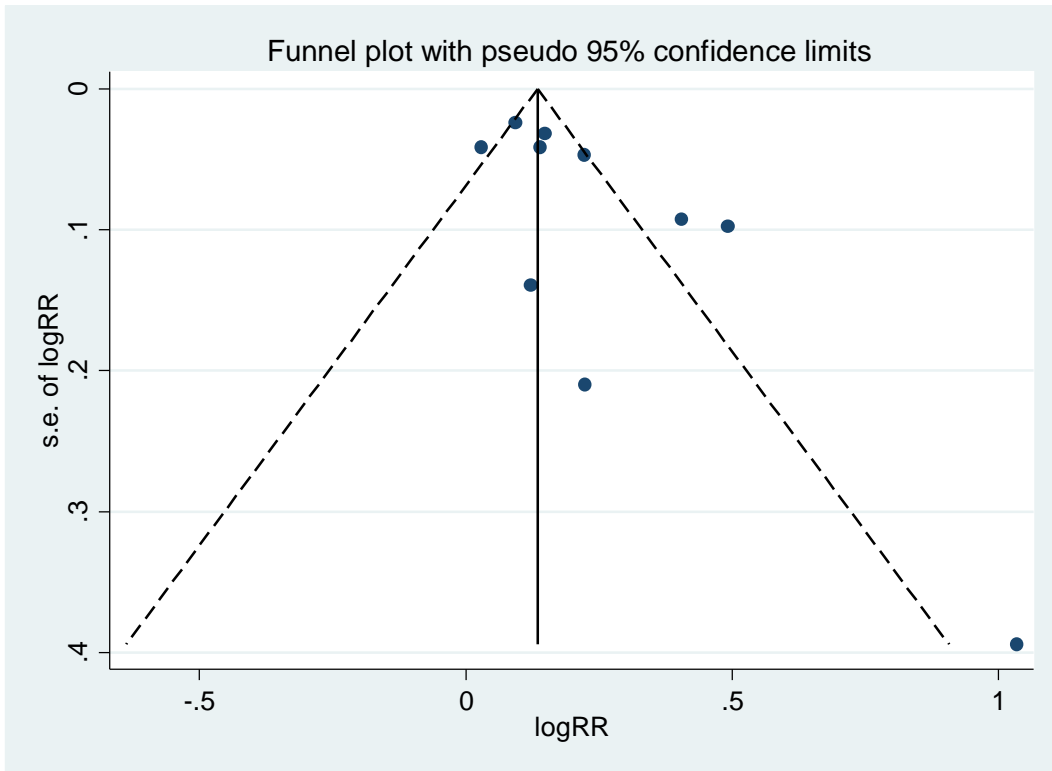

Supplementary Figure S35: Funnel plot showing study precision against the relative risk with 95% CIs for sugar sweetened beverages (dose-response meta-analysis) and risk of T2D. SE = Standard error

Supplementary References S1-88

[1-11]

[1-8, 12-15]

[1, 8, 16-25]

[1, 8, 16-21, 23-26]

[9, 27-32]

[1, 2, 8, 9, 22, 30, 33-36]

[9, 23, 37-46]

[11, 23, 37, 41, 47-61]

[17, 23, 37, 41, 62-70]

[23, 41, 71-79]

[23, 41, 71-78]

[80-88]

1. Meyer KA, Kushi LH, Jacobs DR, Jr., Slavin J, Sellers TA, Folsom AR. Carbohydrates, dietary fiber, and incident type 2 diabetes in older women. *Am J Clin Nutr.* 2000;71(4):921-30.
2. Ericson U, Sonestedt E, Gullberg B, et al. High intakes of protein and processed meat associate with increased incidence of type 2 diabetes. *Br J Nutr.* 2013;109(6):1143-53. doi:10.1017/s0007114512003017
3. Kochar J, Djousse L, Gaziano JM. Breakfast cereals and risk of type 2 diabetes in the Physicians' Health Study I. Obesity (Silver Spring, Md.). 2007;15(12):3039-44. doi:10.1038/oby.2007.362
4. Montonen J, Knekt P, Jarvinen R, Aromaa A, Reunanen A. Whole-grain and fiber intake and the incidence of type 2 diabetes. *Am J Clin Nutr.* 2003;77(3):622-9.
5. Nanri A, Mizoue T, Noda M, et al. Rice intake and type 2 diabetes in Japanese men and women: the Japan Public Health Center-based Prospective Study. *Am J Clin Nutr.* 2010;92(6):1468-77. doi:10.3945/ajcn.2010.29512
6. Parker ED, Liu S, Van Horn L, et al. The association of whole grain consumption with incident type 2 diabetes: the Women's Health Initiative Observational Study. *Annals of epidemiology.* 2013;23(6):321-7. doi:10.1016/j.annepidem.2013.03.010
7. Sun Q, Spiegelman D, van Dam RM, et al. White rice, brown rice, and risk of type 2 diabetes in US men and women. *Arch Intern Med.* 2010;170(11):961-9. doi:10.1001/archinternmed.2010.109
8. Hodge AM, English DR, O'Dea K, Giles GG. Glycemic index and dietary fiber and the risk of type 2 diabetes. *Diabetes Care.* 2004;27(11):2701-6.
9. von Ruesten A, Feller S, Bergmann MM, Boeing H. Diet and risk of chronic diseases: results from the first 8 years of follow-up in the EPIC-Potsdam study. *Eur J Clin Nutr.* 2013;67(4):412-9. doi:10.1038/ejcn.2013.7

10. Wirstrom T, Hilding A, Gu HF, Ostenson CG, Bjorklund A. Consumption of whole grain reduces risk of deteriorating glucose tolerance, including progression to prediabetes. *Am J Clin Nutr.* 2013;97(1):179-87. doi:10.3945/ajcn.112.045583
11. van Dam RM, Hu FB, Rosenberg L, Krishnan S, Palmer JR. Dietary calcium and magnesium, major food sources, and risk of type 2 diabetes in U.S. black women. *Diabetes Care.* 2006;29(10):2238-43. doi:10.2337/dc06-1014
12. Fung TT, Hu FB, Pereira MA, et al. Whole-grain intake and the risk of type 2 diabetes: a prospective study in men. *Am J Clin Nutr.* 2002;76(3):535-40.
13. Liu S, Manson JE, Stampfer MJ, et al. A prospective study of whole-grain intake and risk of type 2 diabetes mellitus in US women. *Am J Public Health.* 2000;90(9):1409-15.
14. Soriquer F, Colomo N, Oliveira G, et al. White rice consumption and risk of type 2 diabetes. *Clin Nutr.* 2013;32(3):481-4. doi:10.1016/j.clnu.2012.11.008
15. Golozar A, Khalili D, Etemadi A, et al. White rice intake and incidence of type-2 diabetes: analysis of two prospective cohort studies from Iran. *BMC Public Health.* 2017;17(1):133. doi:10.1186/s12889-016-3999-4
16. Qiao Y, Tinker L, Olendzki BC, et al. Racial/ethnic disparities in association between dietary quality and incident diabetes in postmenopausal women in the United States: the Women's Health Initiative 1993-2005. *Ethnicity & health.* 2014;19(3):328-47. doi:10.1080/13557858.2013.797322
17. Lacoppidan SA, Kyro C, Loft S, et al. Adherence to a Healthy Nordic Food Index Is Associated with a Lower Risk of Type-2 Diabetes--The Danish Diet, Cancer and Health Cohort Study. *Nutrients.* 2015;7(10):8633-44. doi:10.3390/nu7105418
18. Mamluk L, O'Doherty MG, Orfanos P, et al. Fruit and vegetable intake and risk of incident of type 2 diabetes: results from the consortium on health and ageing network of cohorts in Europe and the United States (CHANCES). *Eur J Clin Nutr.* 2016. doi:10.1038/ejcn.2016.143
19. Mursu J, Virtanen JK, Tuomainen TP, Nurmi T, Voutilainen S. Intake of fruit, berries, and vegetables and risk of type 2 diabetes in Finnish men: the Kuopio Ischaemic Heart Disease Risk Factor Study. *Am J Clin Nutr.* 2014;99(2):328-33. doi:10.3945/ajcn.113.069641
20. Cooper AJ, Forouhi NG, Ye Z, et al. Fruit and vegetable intake and type 2 diabetes: EPIC-InterAct prospective study and meta-analysis. *Eur J Clin Nutr.* 2012;66(10):1082-92. doi:10.1038/ejcn.2012.85
21. Kurotani K, Nanri A, Goto A, et al. Vegetable and fruit intake and risk of type 2 diabetes: Japan Public Health Center-based Prospective Study. *Br J Nutr.* 2013;109(4):709-17. doi:10.1017/s0007114512001705
22. Bazzano LA, Li TY, Josphipura KJ, Hu FB. Intake of fruit, vegetables, and fruit juices and risk of diabetes in women. *Diabetes Care.* 2008;31(7):1311-7. doi:10.2337/dc08-0080
23. Montonen J, Jarvinen R, Heliövaara M, Reunanen A, Aromaa A, Knekt P. Food consumption and the incidence of type II diabetes mellitus. *Eur J Clin Nutr.* 2005;59(3):441-8. doi:10.1038/sj.ejcn.1602094
24. Liu S, Serdula M, Janket SJ, et al. A prospective study of fruit and vegetable intake and the risk of type 2 diabetes in women. *Diabetes Care.* 2004;27(12):2993-6.
25. Villegas R, Shu XO, Gao YT, et al. Vegetable but not fruit consumption reduces the risk of type 2 diabetes in Chinese women. *J Nutr.* 2008;138(3):574-80.
26. Muraki I, Imamura F, Manson JE, et al. Fruit consumption and risk of type 2 diabetes: results from three prospective longitudinal cohort studies. *Bmj.* 2013;347:f5001. doi:10.1136/bmj.f5001
27. Kochar J, Gaziano JM, Djousse L. Nut consumption and risk of type II diabetes in the Physicians' Health Study. *Eur J Clin Nutr.* 2010;64(1):75-9. doi:10.1038/ejcn.2009.121
28. Parker ED, Harnack LJ, Folsom AR. Nut consumption and risk of type 2 diabetes. *Jama.* 2003;290(1):38-9; author reply 9-40. doi:10.1001/jama.290.1.38
29. Pan A, Sun Q, Manson JE, Willett WC, Hu FB. Walnut consumption is associated with lower risk of type 2 diabetes in women. *J Nutr.* 2013;143(4):512-8. doi:10.3945/jn.112.172171
30. Villegas R, Gao YT, Yang G, et al. Legume and soy food intake and the incidence of type 2 diabetes in the Shanghai Women's Health Study. *Am J Clin Nutr.* 2008;87(1):162-7.

31. Buijsse B, Boeing H, Drogan D, et al. Consumption of fatty foods and incident type 2 diabetes in populations from eight European countries. *Eur J Clin Nutr.* 2015;69(4):455-61. doi:10.1038/ejcn.2014.249
32. Asghari G, Ghorbani Z, Mirmiran P, Azizi F. Nut consumption is associated with lower incidence of type 2 diabetes: The Tehran Lipid and Glucose Study. *Diabetes & Metabolism.* 2017;43(1):18-24. doi:<http://dx.doi.org/10.1016/j.diabet.2016.09.008>
33. Morimoto Y, Steinbrecher A, Kolonel LN, Maskarinec G. Soy consumption is not protective against diabetes in Hawaii: the Multiethnic Cohort. *Eur J Clin Nutr.* 2011;65(2):279-82. doi:10.1038/ejcn.2010.228
34. Nanri A, Mizoue T, Takahashi Y, et al. Soy product and isoflavone intakes are associated with a lower risk of type 2 diabetes in overweight Japanese women. *J Nutr.* 2010;140(3):580-6. doi:10.3945/jn.109.116020
35. Mueller NT, Odegaard AO, Gross MD, et al. Soy intake and risk of type 2 diabetes in Chinese Singaporeans [corrected]. *Eur J Nutr.* 2012;51(8):1033-40. doi:10.1007/s00394-011-0276-2
36. Ding M, Pan A, Manson JE, et al. Consumption of soy foods and isoflavones and risk of type 2 diabetes: a pooled analysis of three US cohorts. *Eur J Clin Nutr.* 2016. doi:10.1038/ejcn.2016.117
37. Vang A, Singh PN, Lee JW, Haddad EH, Brinegar CH. Meats, processed meats, obesity, weight gain and occurrence of diabetes among adults: findings from Adventist Health Studies. *Ann Nutr Metab.* 2008;52(2):96-104. doi:10.1159/000121365
38. Djousse L, Gaziano JM, Buring JE, Lee IM. Egg consumption and risk of type 2 diabetes in men and women. *Diabetes Care.* 2009;32(2):295-300. doi:10.2337/dc08-1271
39. Djousse L, Kamineni A, Nelson TL, et al. Egg consumption and risk of type 2 diabetes in older adults. *Am J Clin Nutr.* 2010;92(2):422-7. doi:10.3945/ajcn.2010.29406
40. Djousse L, Petrone AB, Hickson DA, et al. Egg consumption and risk of type 2 diabetes among African Americans: The Jackson Heart Study. *Clin Nutr.* 2016;35(3):679-84. doi:10.1016/j.clnu.2015.04.016
41. Ericson U, Hellstrand S, Brunkwall L, et al. Food sources of fat may clarify the inconsistent role of dietary fat intake for incidence of type 2 diabetes. *Am J Clin Nutr.* 2015;101(5):1065-80. doi:10.3945/ajcn.114.103010
42. Kurotani K, Nanri A, Goto A, et al. Cholesterol and egg intakes and the risk of type 2 diabetes: the Japan Public Health Center-based Prospective Study. *Br J Nutr.* 2014;112(10):1636-43. doi:10.1017/s000711451400258x
43. Lajous M, Bijon A, Fagherazzi G, Balkau B, Boutron-Ruault MC, Clavel-Chapelon F. Egg and cholesterol intake and incident type 2 diabetes among French women. *Br J Nutr.* 2015;114(10):1667-73. doi:10.1017/s0007114515003190
44. Virtanen JK, Mursu J, Tuomainen TP, Virtanen HE, Voutilainen S. Egg consumption and risk of incident type 2 diabetes in men: the Kuopio Ischaemic Heart Disease Risk Factor Study. *Am J Clin Nutr.* 2015;101(5):1088-96. doi:10.3945/ajcn.114.104109
45. Wallin A, Forouhi NG, Wolk A, Larsson SC. Egg consumption and risk of type 2 diabetes: a prospective study and dose-response meta-analysis. *Diabetologia.* 2016;59(6):1204-13.
46. Zazpe I, Beunza JJ, Bes-Rastrollo M, Basterra-Gortari FJ, Mari-Sanchis A, Martinez-Gonzalez MA. Egg consumption and risk of type 2 diabetes in a Mediterranean cohort; the sun project. *Nutr Hosp.* 2013;28(1):105-11. doi:10.3305/nh.2013.28.1.6124
47. Liu S, Choi HK, Ford E, et al. A prospective study of dairy intake and the risk of type 2 diabetes in women. *Diabetes Care.* 2006;29(7):1579-84. doi:10.2337/dc06-0256
48. Elwood PC, Pickering JE, Fehily AM. Milk and dairy consumption, diabetes and the metabolic syndrome: the Caerphilly prospective study. *Journal of epidemiology and community health.* 2007;61(8):695-8. doi:10.1136/jech.2006.053157
49. Kirii K, Mizoue T, Iso H, et al. Calcium, vitamin D and dairy intake in relation to type 2 diabetes risk in a Japanese cohort. *Diabetologia.* 2009;52(12):2542-50. doi:10.1007/s00125-009-1554-x

50. Soedamah-Muthu SS, Masset G, Verberne L, Geleijnse JM, Brunner EJ. Consumption of dairy products and associations with incident diabetes, CHD and mortality in the Whitehall II study. *Br J Nutr.* 2013;109(4):718-26. doi:10.1017/s0007114512001845
51. Margolis KL, Wei F, de Boer IH, et al. A diet high in low-fat dairy products lowers diabetes risk in postmenopausal women. *J Nutr.* 2011;141(11):1969-74. doi:10.3945/jn.111.143339
52. Grantham NM, Magliano DJ, Hodge A, Jowett J, Meikle P, Shaw JE. The association between dairy food intake and the incidence of diabetes in Australia: the Australian Diabetes Obesity and Lifestyle Study (AusDiab). *Public Health Nutr.* 2013;16(2):339-45. doi:10.1017/s1368980012001310
53. Sluijs I, Forouhi NG, Beulens JW, et al. The amount and type of dairy product intake and incident type 2 diabetes: results from the EPIC-InterAct Study. *Am J Clin Nutr.* 2012;96(2):382-90. doi:10.3945/ajcn.111.021907
54. Struijk EA, Heraclides A, Witte DR, et al. Dairy product intake in relation to glucose regulation indices and risk of type 2 diabetes. *Nutr Metab Cardiovasc Dis.* 2013;23(9):822-8. doi:10.1016/j.numecd.2012.05.011
55. Louie JC, Flood VM, Rangan AM, et al. Higher regular fat dairy consumption is associated with lower incidence of metabolic syndrome but not type 2 diabetes. *Nutr Metab Cardiovasc Dis.* 2013;23(9):816-21. doi:10.1016/j.numecd.2012.08.004
56. Zong G, Sun Q, Yu D, et al. Dairy consumption, type 2 diabetes, and changes in cardiometabolic traits: a prospective cohort study of middle-aged and older Chinese in Beijing and Shanghai. *Diabetes Care.* 2014;37(1):56-63. doi:10.2337/dc13-0975
57. Chen M, Sun Q, Giovannucci E, et al. Dairy consumption and risk of type 2 diabetes: 3 cohorts of US adults and an updated meta-analysis. *BMC Med.* 2014;12:215. doi:10.1186/s12916-014-0215-1
58. Diaz-Lopez A, Bullo M, Martinez-Gonzalez MA, et al. Dairy product consumption and risk of type 2 diabetes in an elderly Spanish Mediterranean population at high cardiovascular risk. *Eur J Nutr.* 2016;55(1):349-60. doi:10.1007/s00394-015-0855-8
59. Brouwer-Brolsma EM, van Woudenberg GJ, Oude Elferink SJ, et al. Intake of different types of dairy and its prospective association with risk of type 2 diabetes: The Rotterdam Study. *Nutr Metab Cardiovasc Dis.* 2016. doi:10.1016/j.numecd.2016.08.003
60. Villegas R, Gao YT, Dai Q, et al. Dietary calcium and magnesium intakes and the risk of type 2 diabetes: the Shanghai Women's Health Study. *Am J Clin Nutr.* 2009;89(4):1059-67. doi:10.3945/ajcn.2008.27182
61. Moslehi N, Shab-Bidar S, Mirmiran P, Sadeghi M, Azizi F. Associations between dairy products consumption and risk of type 2 diabetes: Tehran lipid and glucose study. *Int J Food Sci Nutr.* 2015;66(6):692-9. doi:10.3109/09637486.2015.1034249
62. Patel PS, Sharp SJ, Luben RN, et al. Association between type of dietary fish and seafood intake and the risk of incident type 2 diabetes: the European prospective investigation of cancer (EPIC)-Norfolk cohort study. *Diabetes Care.* 2009;32(10):1857-63. doi:10.2337/dc09-0116
63. Kaushik M, Mozaffarian D, Spiegelman D, Manson JE, Willett WC, Hu FB. Long-chain omega-3 fatty acids, fish intake, and the risk of type 2 diabetes mellitus. *Am J Clin Nutr.* 2009;90(3):613-20. doi:10.3945/ajcn.2008.27424
64. van Woudenberg GJ, van Ballegooijen AJ, Kuijsten A, et al. Eating fish and risk of type 2 diabetes: A population-based, prospective follow-up study. *Diabetes Care.* 2009;32(11):2021-6. doi:10.2337/dc09-1042
65. Krishnan S, Coogan PF, Boggs DA, Rosenberg L, Palmer JR. Consumption of restaurant foods and incidence of type 2 diabetes in African American women. *Am J Clin Nutr.* 2010;91(2):465-71. doi:10.3945/ajcn.2009.28682
66. Djousse L, Gaziano JM, Buring JE, Lee IM. Dietary omega-3 fatty acids and fish consumption and risk of type 2 diabetes. *Am J Clin Nutr.* 2011;93(1):143-50. doi:10.3945/ajcn.110.005603
67. Villegas R, Xiang YB, Elasy T, et al. Fish, shellfish, and long-chain n-3 fatty acid consumption and risk of incident type 2 diabetes in middle-aged Chinese men and women. *Am J Clin Nutr.* 2011;94(2):543-51. doi:10.3945/ajcn.111.013193

68. Nanri A, Mizoue T, Noda M, et al. Fish intake and type 2 diabetes in Japanese men and women: the Japan Public Health Center-based Prospective Study. *Am J Clin Nutr.* 2011;94(3):884-91. doi:10.3945/ajcn.111.012252
69. Wallin A, Di Giuseppe D, Orsini N, Akesson A, Forouhi NG, Wolk A. Fish consumption and frying of fish in relation to type 2 diabetes incidence: a prospective cohort study of Swedish men. *Eur J Nutr.* 2015. doi:10.1007/s00394-015-1132-6
70. Rylander C, Sandanger TM, Engeset D, Lund E. Consumption of lean fish reduces the risk of type 2 diabetes mellitus: a prospective population based cohort study of Norwegian women. *PLoS One.* 2014;9(2):e89845. doi:10.1371/journal.pone.0089845
71. Mannisto S, Kontto J, Kataja-Tuomola M, Albanes D, Virtamo J. High processed meat consumption is a risk factor of type 2 diabetes in the Alpha-Tocopherol, Beta-Carotene Cancer Prevention study. *Br J Nutr.* 2010;103(12):1817-22. doi:10.1017/s0007114510000073
72. Song Y, Manson JE, Buring JE, Liu S. A prospective study of red meat consumption and type 2 diabetes in middle-aged and elderly women: the women's health study. *Diabetes Care.* 2004;27(9):2108-15.
73. Villegas R, Shu XO, Gao YT, et al. The association of meat intake and the risk of type 2 diabetes may be modified by body weight. *International journal of medical sciences.* 2006;3(4):152-9.
74. Steinbrecher A, Erber E, Grandinetti A, Kolonel LN, Maskarinec G. Meat consumption and risk of type 2 diabetes: the Multiethnic Cohort. *Public Health Nutr.* 2011;14(4):568-74. doi:10.1017/s1368980010002004
75. Pan A, Sun Q, Bernstein AM, et al. Red meat consumption and risk of type 2 diabetes: 3 cohorts of US adults and an updated meta-analysis. *Am J Clin Nutr.* 2011;94(4):1088-96. doi:10.3945/ajcn.111.018978
76. Fretts AM, Howard BV, McKnight B, et al. Associations of processed meat and unprocessed red meat intake with incident diabetes: the Strong Heart Family Study. *Am J Clin Nutr.* 2012;95(3):752-8. doi:10.3945/ajcn.111.029942
77. van Woudenberg GJ, Kuijsten A, Tigcheler B, et al. Meat consumption and its association with C-reactive protein and incident type 2 diabetes: the Rotterdam Study. *Diabetes Care.* 2012;35(7):1499-505. doi:10.2337/dc11-1899
78. Mari-Sanchis A, Gea A, Basterra-Gortari FJ, Martinez-Gonzalez MA, Beunza JJ, Bes-Rastrollo M. Meat Consumption and Risk of Developing Type 2 Diabetes in the SUN Project: A Highly Educated Middle-Class Population. *PLoS One.* 2016;11(7):e0157990. doi:10.1371/journal.pone.0157990
79. Lee DH, Folsom AR, Jacobs DR, Jr. Dietary iron intake and Type 2 diabetes incidence in postmenopausal women: the Iowa Women's Health Study. *Diabetologia.* 2004;47(2):185-94. doi:10.1007/s00125-003-1307-1
80. Bhupathiraju SN, Pan A, Malik VS, et al. Caffeinated and caffeine-free beverages and risk of type 2 diabetes. *Am J Clin Nutr.* 2013;97(1):155-66. doi:10.3945/ajcn.112.048603
81. Romaguera D, Norat T, Wark PA, et al. Consumption of sweet beverages and type 2 diabetes incidence in European adults: results from EPIC-InterAct. *Diabetologia.* 2013;56(7):1520-30. doi:10.1007/s00125-013-2899-8
82. Montonen J, Jarvinen R, Knekt P, Heliövaara M, Reunanen A. Consumption of sweetened beverages and intakes of fructose and glucose predict type 2 diabetes occurrence. *J Nutr.* 2007;137(6):1447-54.
83. Odegaard AO, Koh WP, Arakawa K, Yu MC, Pereira MA. Soft drink and juice consumption and risk of physician-diagnosed incident type 2 diabetes: the Singapore Chinese Health Study. *Am J Epidemiol.* 2010;171(6):701-8. doi:10.1093/aje/kwp452
84. Palmer JR, Boggs DA, Krishnan S, Hu FB, Singer M, Rosenberg L. Sugar-sweetened beverages and incidence of type 2 diabetes mellitus in African American women. *Arch Intern Med.* 2008;168(14):1487-92. doi:10.1001/archinte.168.14.1487
85. Paynter NP, Yeh HC, Voutilainen S, et al. Coffee and sweetened beverage consumption and the risk of type 2 diabetes mellitus: the atherosclerosis risk in communities study. *Am J Epidemiol.* 2006;164(11):1075-84. doi:10.1093/aje/kwj323

86. Sakurai M, Nakamura K, Miura K, et al. Sugar-sweetened beverage and diet soda consumption and the 7-year risk for type 2 diabetes mellitus in middle-aged Japanese men. *Eur J Nutr.* 2014;53(1):251-8. doi:10.1007/s00394-013-0523-9
87. Schulze MB, Manson JE, Ludwig DS, et al. Sugar-sweetened beverages, weight gain, and incidence of type 2 diabetes in young and middle-aged women. *Jama.* 2004;292(8):927-34. doi:10.1001/jama.292.8.927
88. Eshak ES, Iso H, Mizoue T, Inoue M, Noda M, Tsugane S. Soft drink, 100% fruit juice, and vegetable juice intakes and risk of diabetes mellitus. *Clin Nutr.* 2013;32(2):300-8. doi:10.1016/j.clnu.2012.08.003
